# Supplementary material for: Superhelicenes in the gas phase: experimental and computational evidence of stable radical cation dimers
Source: Royal Society of Chemistry journal article supplement (doi:10.1039/d3cc01312j), 2023-01-01
Supplement: d3cc01312j1.pdf [file d3cc01312j1.pdf]

## Supporting Information

### Superhelicenes in the gas phase: Experimental and computational evidence of stable radical cation dimers

Marina Kinzelmann, David Reger, Vera Warmbrunn, Dominik Lungerich,  
Norbert Jux, Thomas Drewello

#### Contents

|                                                               |    |
|---------------------------------------------------------------|----|
| Mass Spectrometry .....                                       | 2  |
| Material and Sample preparation .....                         | 2  |
| Instrumentation and methods .....                             | 2  |
| Breakdown graph of mono- and dicationic monomers A and B..... | 3  |
| DFT calculations .....                                        | 5  |
| General Computational Methods .....                           | 5  |
| XYZ Coordinates.....                                          | 15 |
| References .....                                              | 33 |

# Mass Spectrometry

## Material and Sample preparation

Both molecules (**A** and **B**) were synthesized following reported procedures.<sup>1</sup> Stock solutions of **A** and **B** were prepared in dichloromethane (0.2 g/L). The final concentration for the electrospray measurements was  $10^{-5}$  M for **A** and **B**, diluted in acetonitrile (ACN) and dichloromethane (DCM) (1:1; v:v). All solvents were purchased from VWR Chemicals in HPLC grade purity.

## Instrumentation and methods

The measurements were performed using a MS/MS capable electrospray ionization quadrupole/time-of-flight (ESI-Qq-ToF) instrument (micrOTOF-Q II, Bruker). Between the needle and the glass capillary, a voltage of - 4.5 kV (positive ion mode) was applied. The nebulizer nitrogen pressure was set to 400 hPa, the dry gas flowrate to 4.0 L/min and 453 K gas temperature. The instrumental parameters were optimized to obtain good intensities for the respective experiments. For the MS/MS experiments, the precursor ions were mass selected by the mass analyser quadrupole and accelerated into the collision cell quadrupole, which contained nitrogen as collision gas, generated by a Parker LCMS64 nitrogen generator with a purity of 99.999 % and a flow rate of 0.5 L/min.

The survival yield (SY) of the precursor ion was plotted as a function of the collision energy in the centre-of-mass frame ( $E_{com}$ ).<sup>2</sup>  $E_{com}$  is expressed by equation (1) through conversion of the laboratory frame collision energy  $E_{lab}$ .  $M_{N_2}$  represents the molecular mass of nitrogen used as the collision gas and  $M_{ion}$  is the molecular mass of the investigated precursor ion.

$$E_{com} = E_{lab} \times \frac{M_{N_2}}{M_{N_2} + M_{ion}} \quad (1)$$

# Breakdown graph of mono- and dicationic monomers A and B

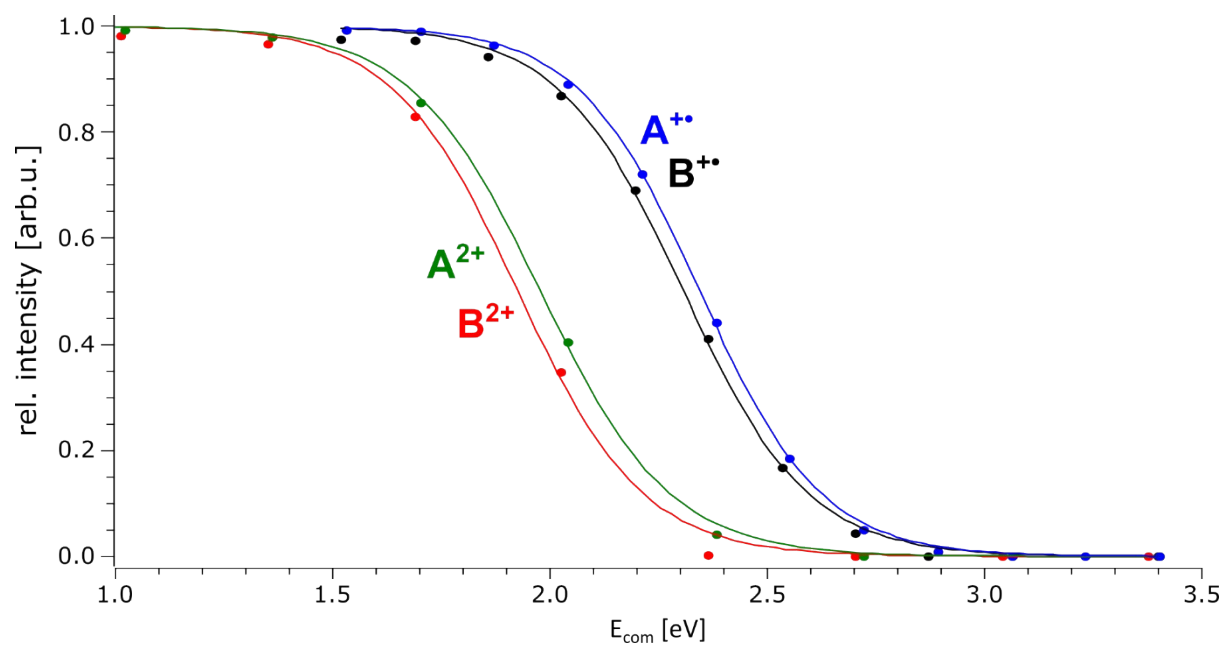

**Figure S1:** Breakdown graphs of the mono- and dicationic superhelicene monomers A and B.

## CID mass spectrum of $(A^{2+})(B^{2+})$

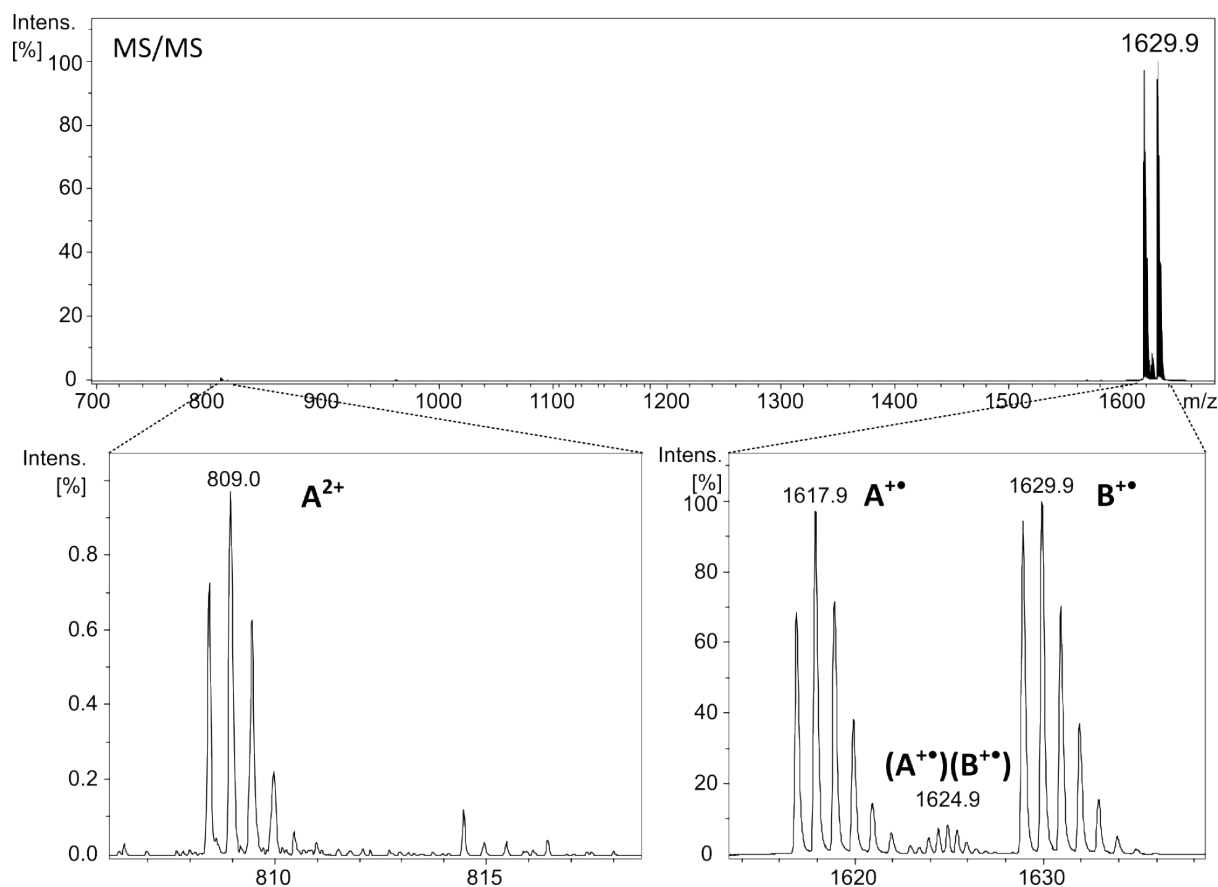

**Figure S2:** The CID mass spectrum of  $AB^{2+}$

The CID spectra of  $AB^{2+}$  show a signal for  $A^{2+}$  of about 1% relative intensity to the signals of  $A^{+}$  and  $B^{+}$ . The  $A^{2+}$  signal is, however, not very likely caused by fragmentation of  $AB^{2+}$  and, therefore, cannot be taken as evidence of a dication-neutral complex on the basis of the following points.

Firstly, the  $A^{2+}$  signal did not show any intensity variations and was observed in low abundance at various collision energies almost throughout the whole CID experiment.

Secondly, there is no clearly visible signal for  $B^{2+}$  in the CID spectra of  $AB^{2+}$ . A dication-neutral complex would not only have a composition of  $A^{2+}-B$  but also of  $B^{2+}-A$  and should also show the  $B^{2+}$  fragment ion in similar abundance as  $A^{2+}$ .

Thirdly, in the CID spectra of  $A_2^{2+}$  and  $B_2^{2+}$  a dication fragment signal ( $A^{2+}$  or  $B^{2+}$ ) could not be established.

We assume that the  $A^{2+}$  signal in the CID spectrum of  $AB^{2+}$  is caused by the fragmentation of a higher charged isobaric interference.

## DFT calculations

### General Computational Methods

Geometry optimization and energy calculations were carried out using Q-Chem, implemented in the Spartan '20 work-package.<sup>3,4</sup>

The structures of monomeric helicenes were first optimized at the semi-empirical level PM6, and then further refined at the density functional theory level, using the Grimme dispersion-corrected range-separated hybrid generalized gradient approximation (RSH-GGA) functional  $\omega$ B97X-D by Head-Gordon with the Pople-type dual basis split-valance double- $\zeta$  quality basis set 6-31G(d).<sup>5</sup> All geometries were optimized in the respective charge state of interest (neutral, open-shell radical cation, open-shell dication, and closed-shell dication). Outer *tert*-butyl groups, which do not interact with the  $\pi$ -surfaces, were omitted to reduce the computational costs. Single-point calculations for the energy evaluation and display of surfaces were carried out using the triple- $\zeta$  quality basis set 6-311G(d,p).

Calculations of dimeric structures were generated from the crystal structure of **A** (CIF: 2062652).<sup>1</sup> The *tert*-butyl groups were replaced by H-atoms and the carbon skeleton was frozen to maintain the geometrical arrangement of the two molecules as obtained in the crystal structure. Derivatives of **A** and **AB** dimers were made from the parent crystal structure and modification at the appropriate position. Single point calculations of the neutral, open-shell radical cation, open-shell dication, and closed-shell dication were carried out using the generalized gradient approximation (GGA) PBE-D3,<sup>6,7</sup> the global-hybrid generalized gradient approximation (GH-GGA) B3LYP-D3,<sup>7-9</sup> and the RSH-GGA CAM-B3LYP functional,<sup>10</sup> in combination with the Karlsruhe-type dual-basis double- $\zeta$  def2-SVPD[def2-SV(P)] basis set by Ahlrich and Weigend.<sup>11</sup>

**Table 1:** Summary of DFT calculations. Basis set for entries 1–8: 6-311G(d,p)[6-31G(d)], for 9-23: def2-SVPD[def2-SV(P)].

| Entry | Functional      | Species               | $E$ (a.u.)   | $\Delta E$ (eV) | HOMO (eV) | LUMO (eV) | HLG (eV) |
|-------|-----------------|-----------------------|--------------|-----------------|-----------|-----------|----------|
| 1     | $\omega$ B97X-D | [B]                   | -3648.035473 | 0               | -6.94     | -1.12     | -5.82    |
| 2     |                 | [B] <sup>++</sup>     | -3647.795282 | 6.53593338      | -9.17     | -3.89     | -5.28    |
| 3     |                 | [osB] <sup>2+</sup>   | -3647.470186 | 15.3822507      | -11.25    | -8.3      | -2.95    |
| 4     |                 | [csB] <sup>2+</sup>   | -3647.478728 | 15.1498109      | -11.31    | -5.62     | -5.69    |
| 5     | $\omega$ B97X-D | [A]                   | -3609.931973 | 0               | -6.86     | -0.93     | -5.93    |
| 6     |                 | [A] <sup>++</sup>     | -3609.69469  | 6.45680263      | -9.09     | -3.67     | -5.42    |
| 7     |                 | [osA] <sup>2+</sup>   | -3609.371914 | 15.2399895      | -11.16    | -8.28     | -2.88    |
| 8     |                 | [csA] <sup>2+</sup>   | -3609.382105 | 14.9626781      | -11.2     | -5.4      | -5.8     |
| 9     | B3LYP-D3        | [2B]                  | -6663.72539  | 0               | -5.23     | -2.66     | 2.57     |
| 10    |                 | [2B] <sup>++</sup>    | -6663.506755 | 5.94936444      | -7.01     | -4.45     | 2.56     |
| 11    |                 | [os-2B] <sup>2+</sup> | -6663.224752 | 13.6230609      | -8.51     | -8.23     | 0.28     |
| 12    |                 | [cs-2B] <sup>2+</sup> | -6663.230083 | 13.4779969      | -8.66     | -6.11     | 2.55     |
| 13    | CAM-            | [2B]                  | -6659.636864 | 0               | -6.28     | -1.66     | 4.62     |
| 14    | B3LYP           | [2B] <sup>++</sup>    | -6659.399816 | 6.45040795      | -8.06     | -3.57     | 4.49     |
| 15    |                 | [os-2B] <sup>2+</sup> | -6659.093702 | 14.7801984      | -9.27     | -8.4      | 0.87     |
| 16    |                 | [cs-2B] <sup>2+</sup> | -6659.114852 | 14.2046773      | -9.69     | -5.23     | 4.46     |
| 17    | B3LYP-D3        | [AB]                  | -6625.624393 | 0               | -5.22     | -2.64     | 2.58     |
| 18    |                 | [AB] <sup>++</sup>    | -6625.406322 | 5.93401721      | -6.99     | -4.43     | 2.56     |
| 19    |                 | [os-AB] <sup>2+</sup> | -6625.12507  | 13.5872779      | -8.49     | -8.21     | 0.28     |
| 20    |                 | [cs-AB] <sup>2+</sup> | -6625.130327 | 13.4442276      | -8.63     | -6.09     | 2.54     |
| 21    | CAM-            | [AB]                  | -6621.560839 | 0               | -6.27     | -1.65     | 4.62     |
| 22    | B3LYP           | [AB] <sup>++</sup>    | -6621.324355 | 6.43506072      | -7.98     | -3.45     | 4.53     |
| 23    |                 | [os-AB] <sup>2+</sup> | -6621.018761 | 14.7507013      | -9.25     | -8.39     | 0.86     |
| 24    |                 | [cs-AB] <sup>2+</sup> | -6621.039828 | 14.1774387      | -9.64     | -5.2      | 4.44     |
| 25    | B3LYP-D3        | [2A]                  | -6591.989552 | 0               | -4.94     | -2.09     | 2.85     |
| 26    |                 | [2A] <sup>++</sup>    | -6591.783819 | 5.59828296      | -6.72     | -3.88     | 2.84     |
| 27    |                 | [os-2A] <sup>2+</sup> | N/A          | --              | --        | --        | --       |
| 28    |                 | [cs-2A] <sup>2+</sup> | N/A          | --              | --        | --        | --       |
| 29    | CAM-            | [2A]                  | -6583.484891 | 0               | -6.26     | -1.45     | 4.81     |
| 30    | B3LYP           | [2A] <sup>++</sup>    | -6583.248788 | 6.42469317      | -8.01     | -3.34     | 4.67     |
| 31    |                 | [os-2A] <sup>2+</sup> | -6582.94384  | 14.7227552      | -9.23     | -8.38     | 0.85     |
| 32    |                 | [cs-2A] <sup>2+</sup> | -6582.964828 | 14.1516423      | -9.62     | -4.95     | 4.67     |

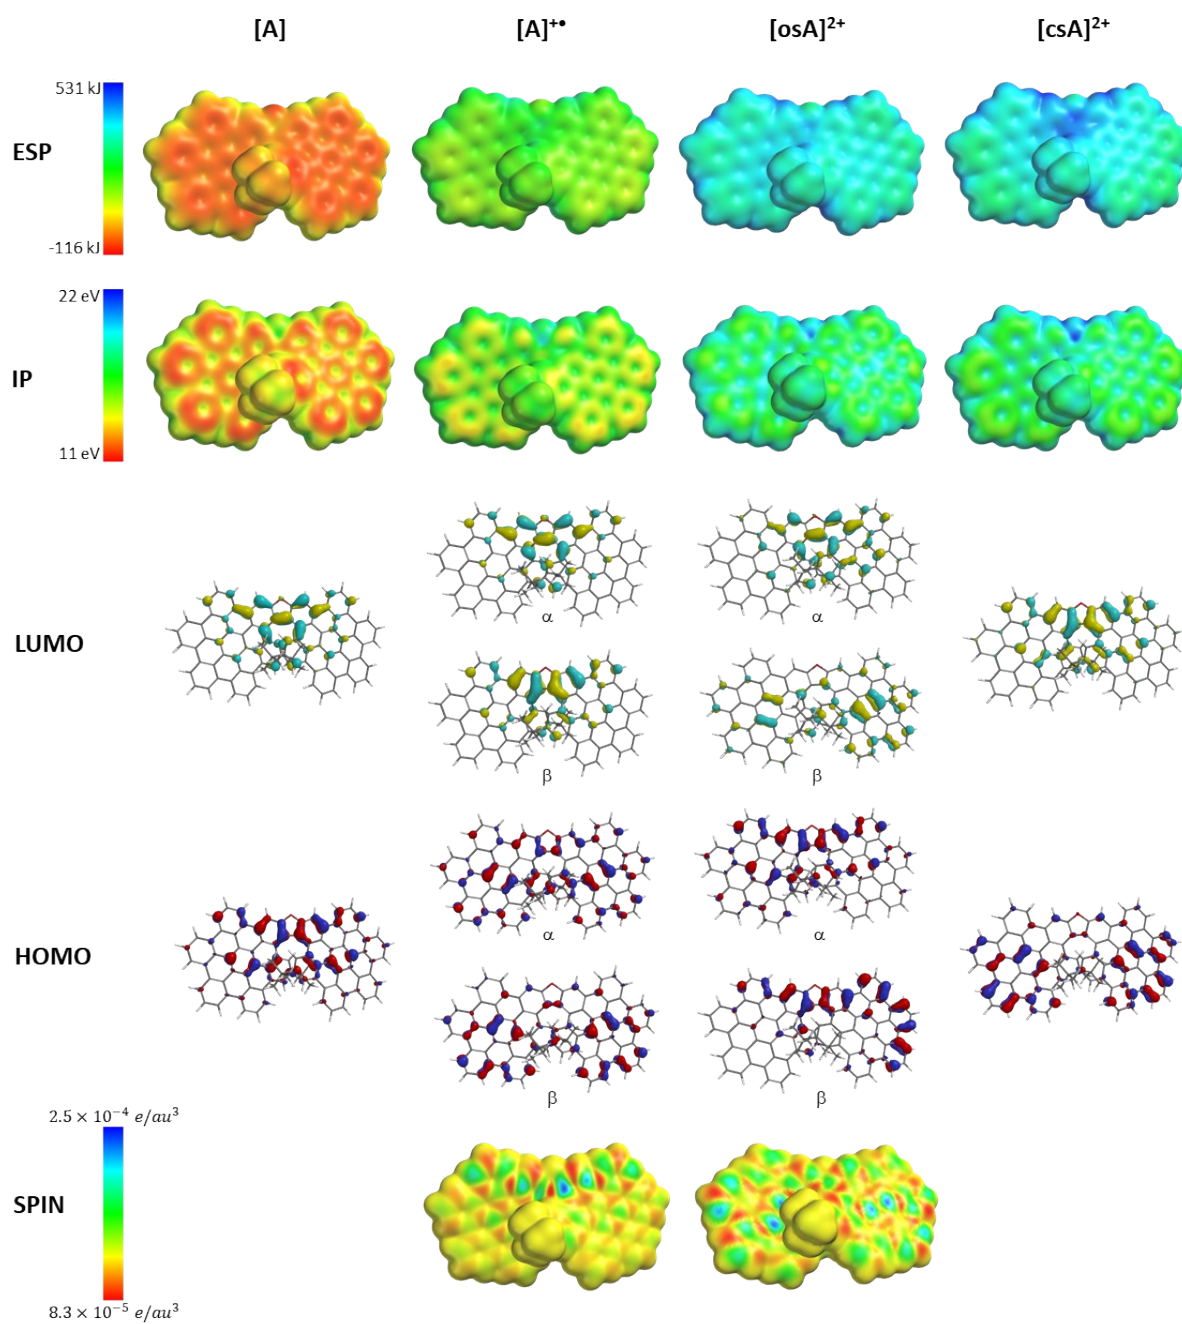

**Figure S3:** Visualization and comparison of different surfaces of each calculated molecule/ion of **A**; ESP = electrostatic potential map, IP = ionization potential map, LUMO = lowest unoccupied molecular orbital, HOMO = highest occupied molecular orbital, SPIN = spin density map; Isovalue for density maps:  $0.002 e/au^3$ , for orbitals:  $0.032 (e/au^3)^{0.5}$ .

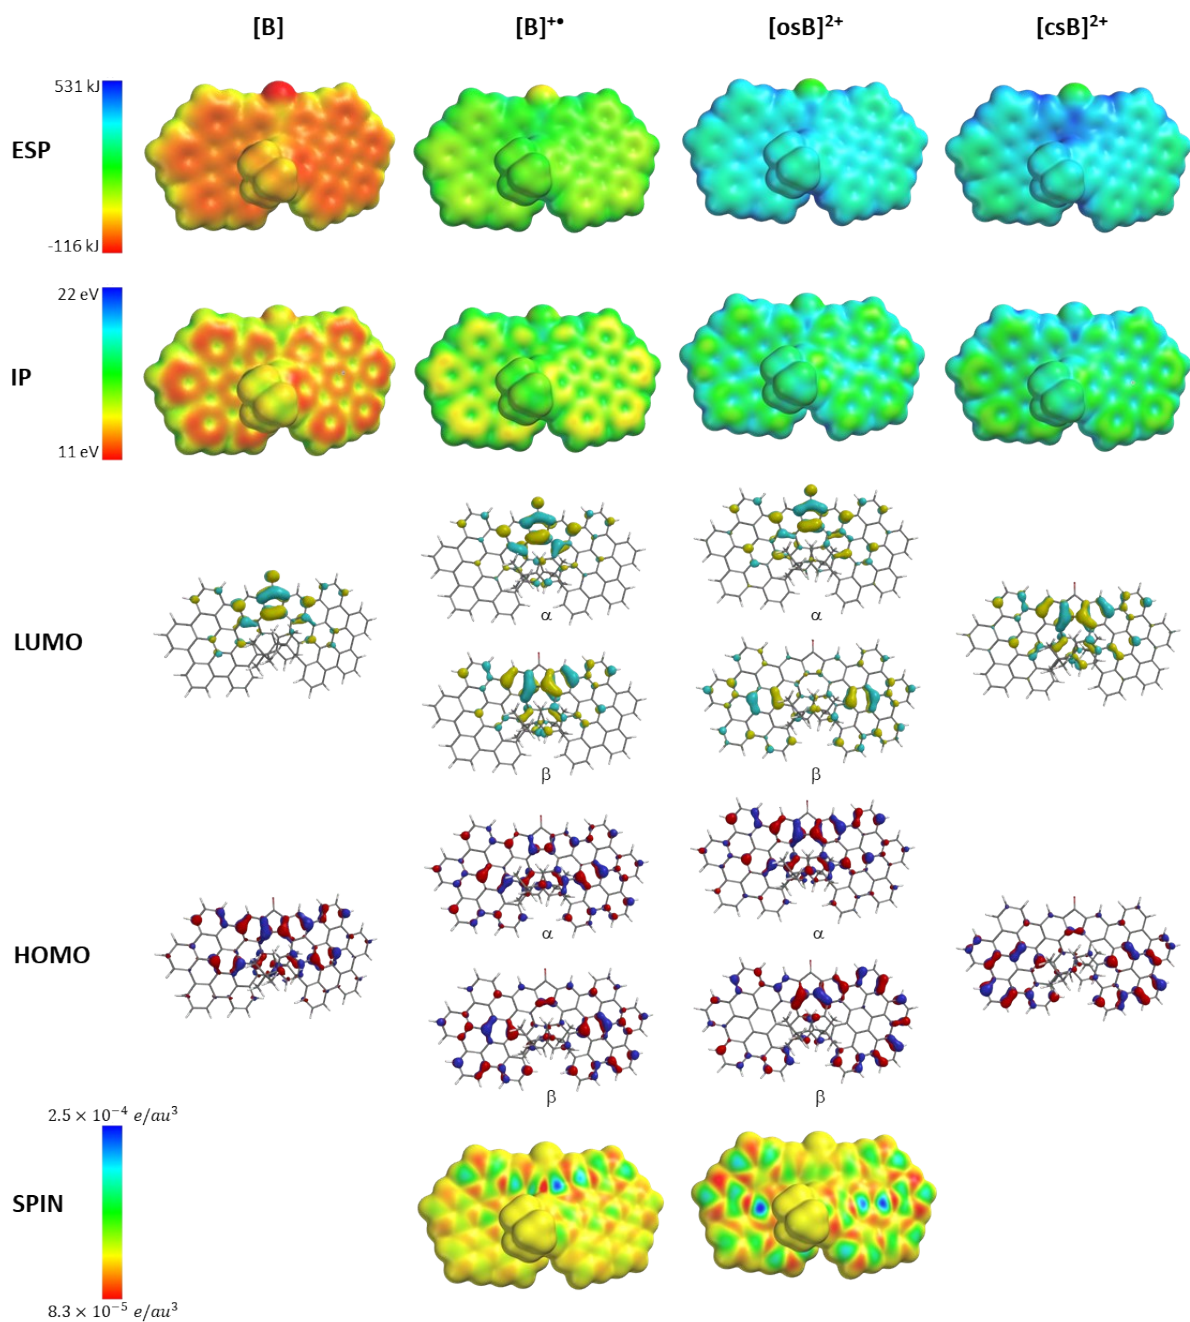

**Figure S4:** Visualization and comparison of different surfaces of each calculated molecule/ion of **B**; ESP = electrostatic potential map, IP = ionization potential map, LUMO = lowest unoccupied molecular orbital, HOMO = highest occupied molecular orbital, SPIN = spin density map; Isovalue for density maps:  $0.002 e/au^3$ , for orbitals:  $0.032 (e/au^3)^{0.5}$ .



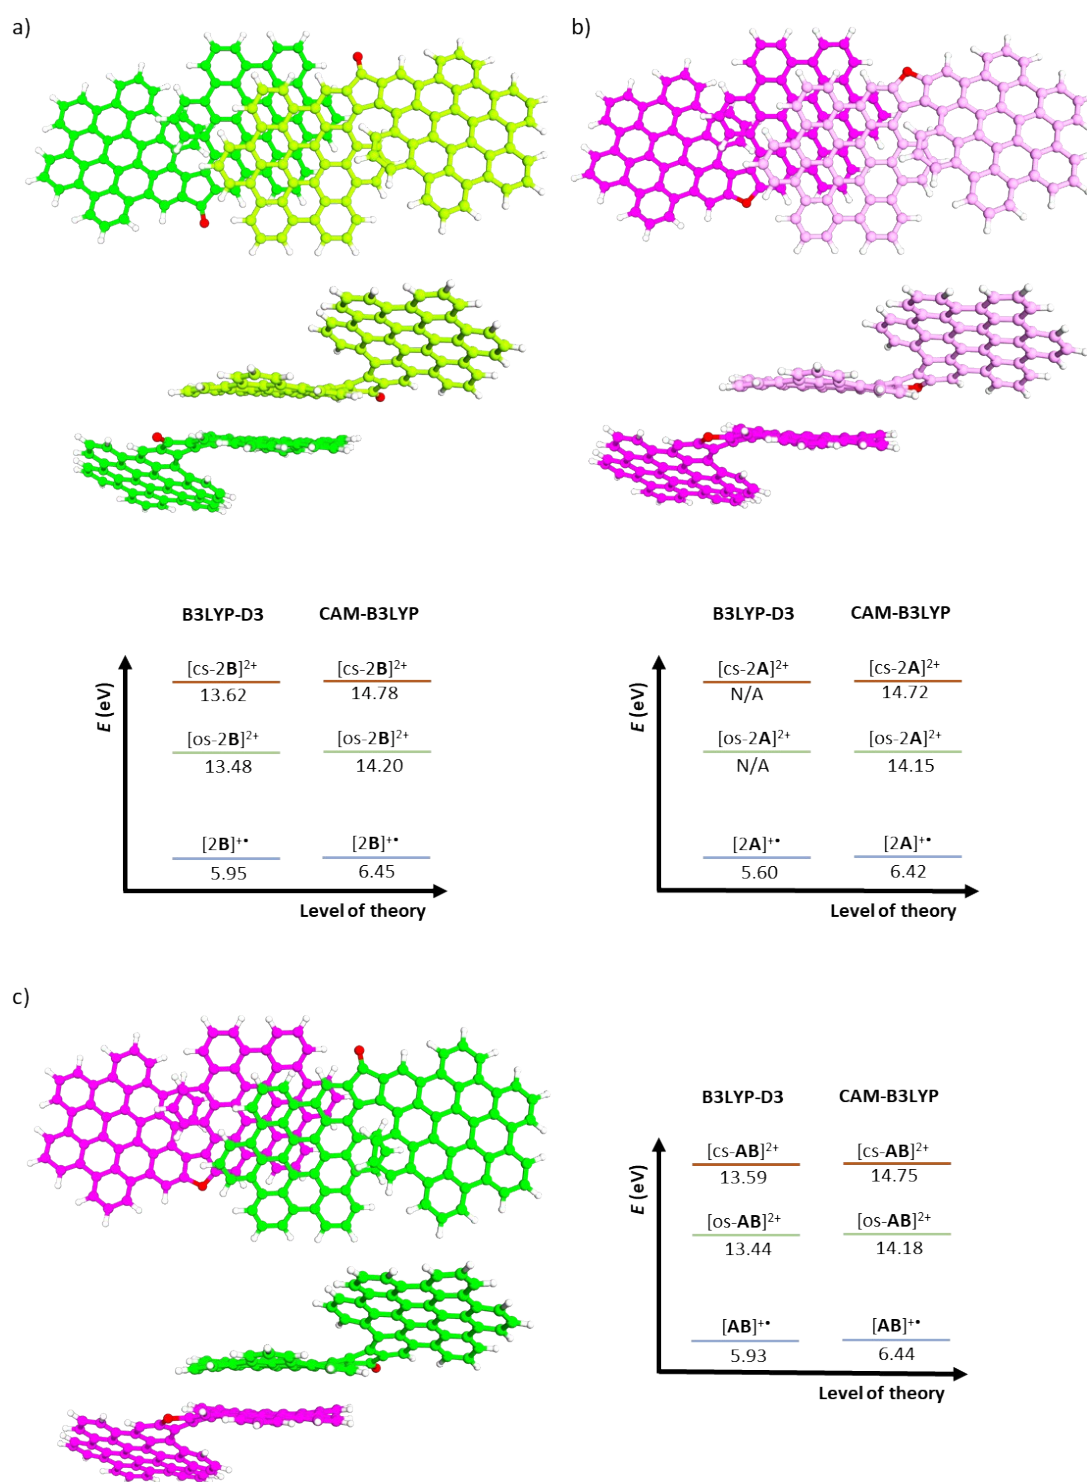

**Figure S5:** Thermochemical analysis of gas-phase dimer ions of a) B, b) A, and c) A and B, calculated with different density functionals with the def2-SVPD[SV(P)] basis set; cs = closed shell, os = open shell.

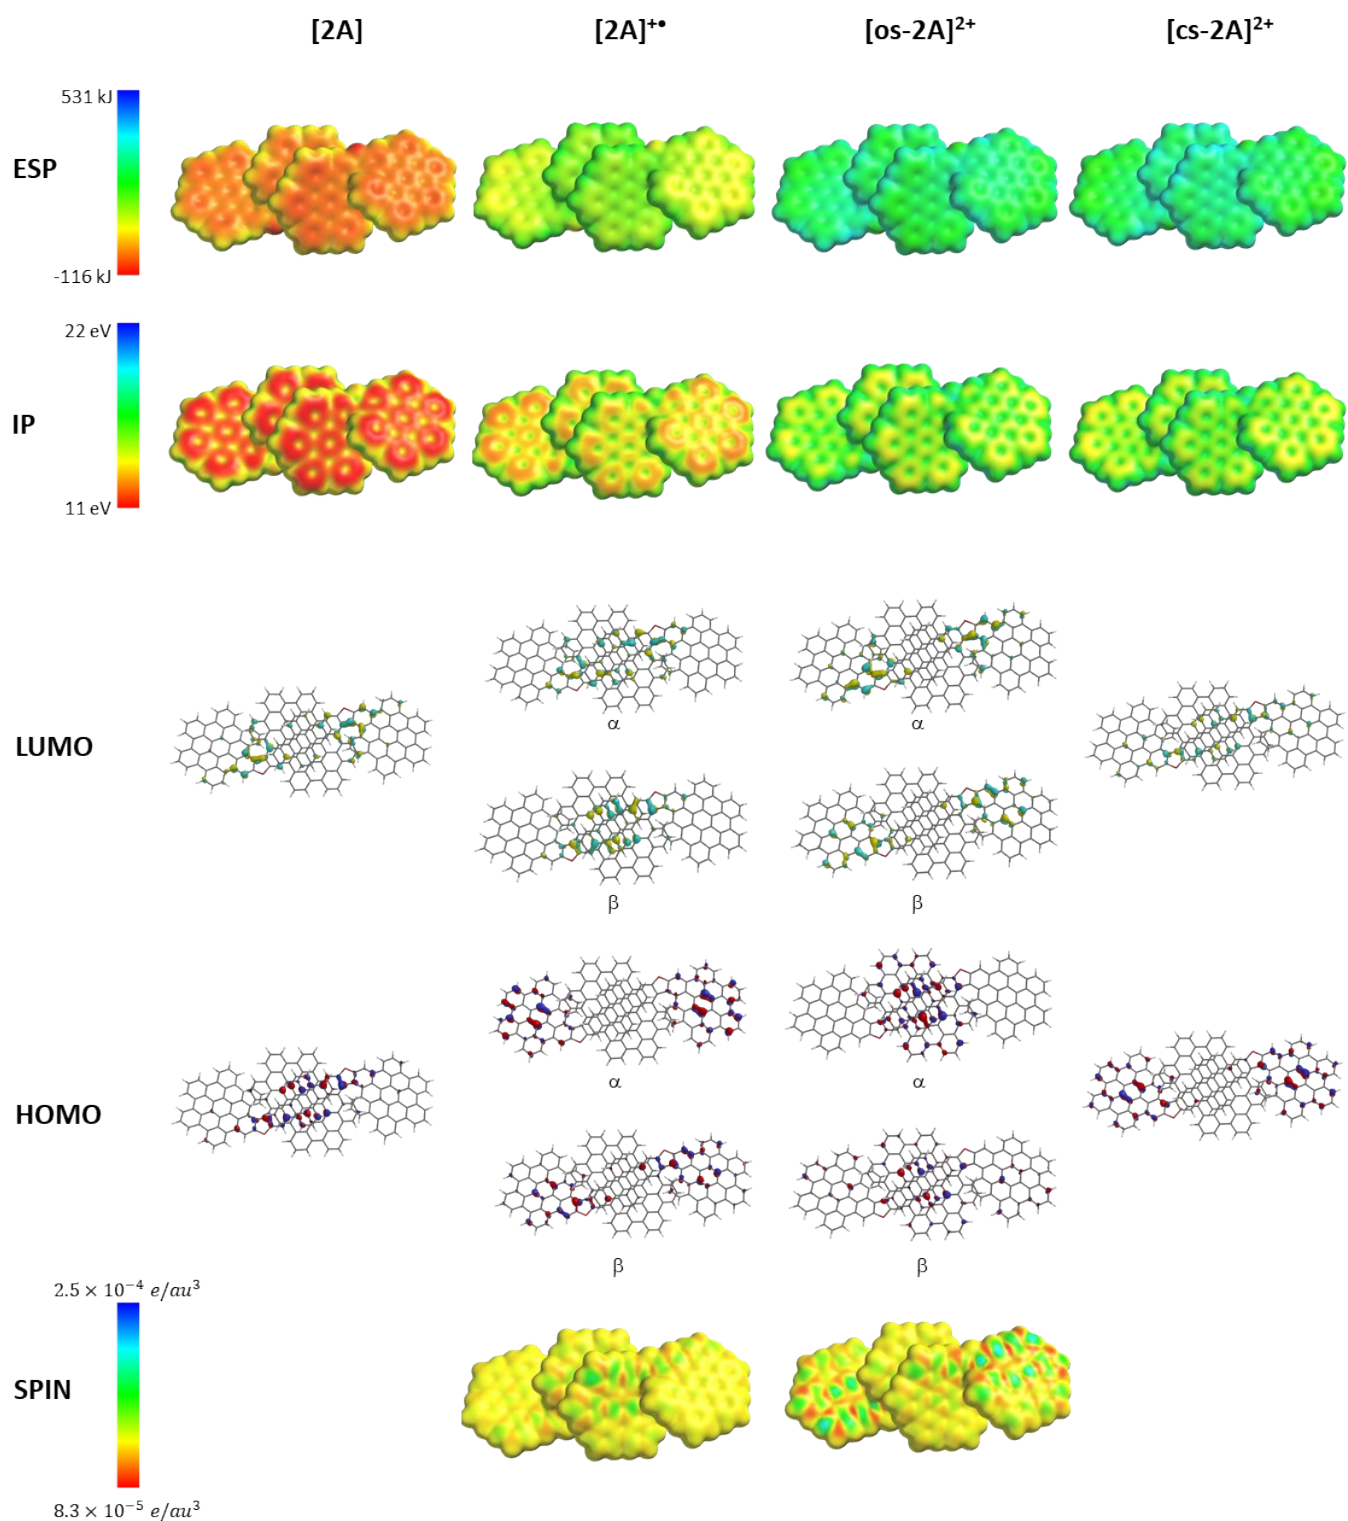

**Figure S6:** Visualization and comparison of different surfaces of each calculated molecule/ion dimer pair of **A**; ESP = electrostatic potential map, IP = ionization potential map, LUMO = lowest unoccupied molecular orbital, HOMO = highest occupied molecular orbital, SPIN = spin density map; Isovalue for density maps:  $0.002 \text{ e/au}^3$ , for orbitals:  $0.032 (\text{e/au}^3)^{0.5}$ .



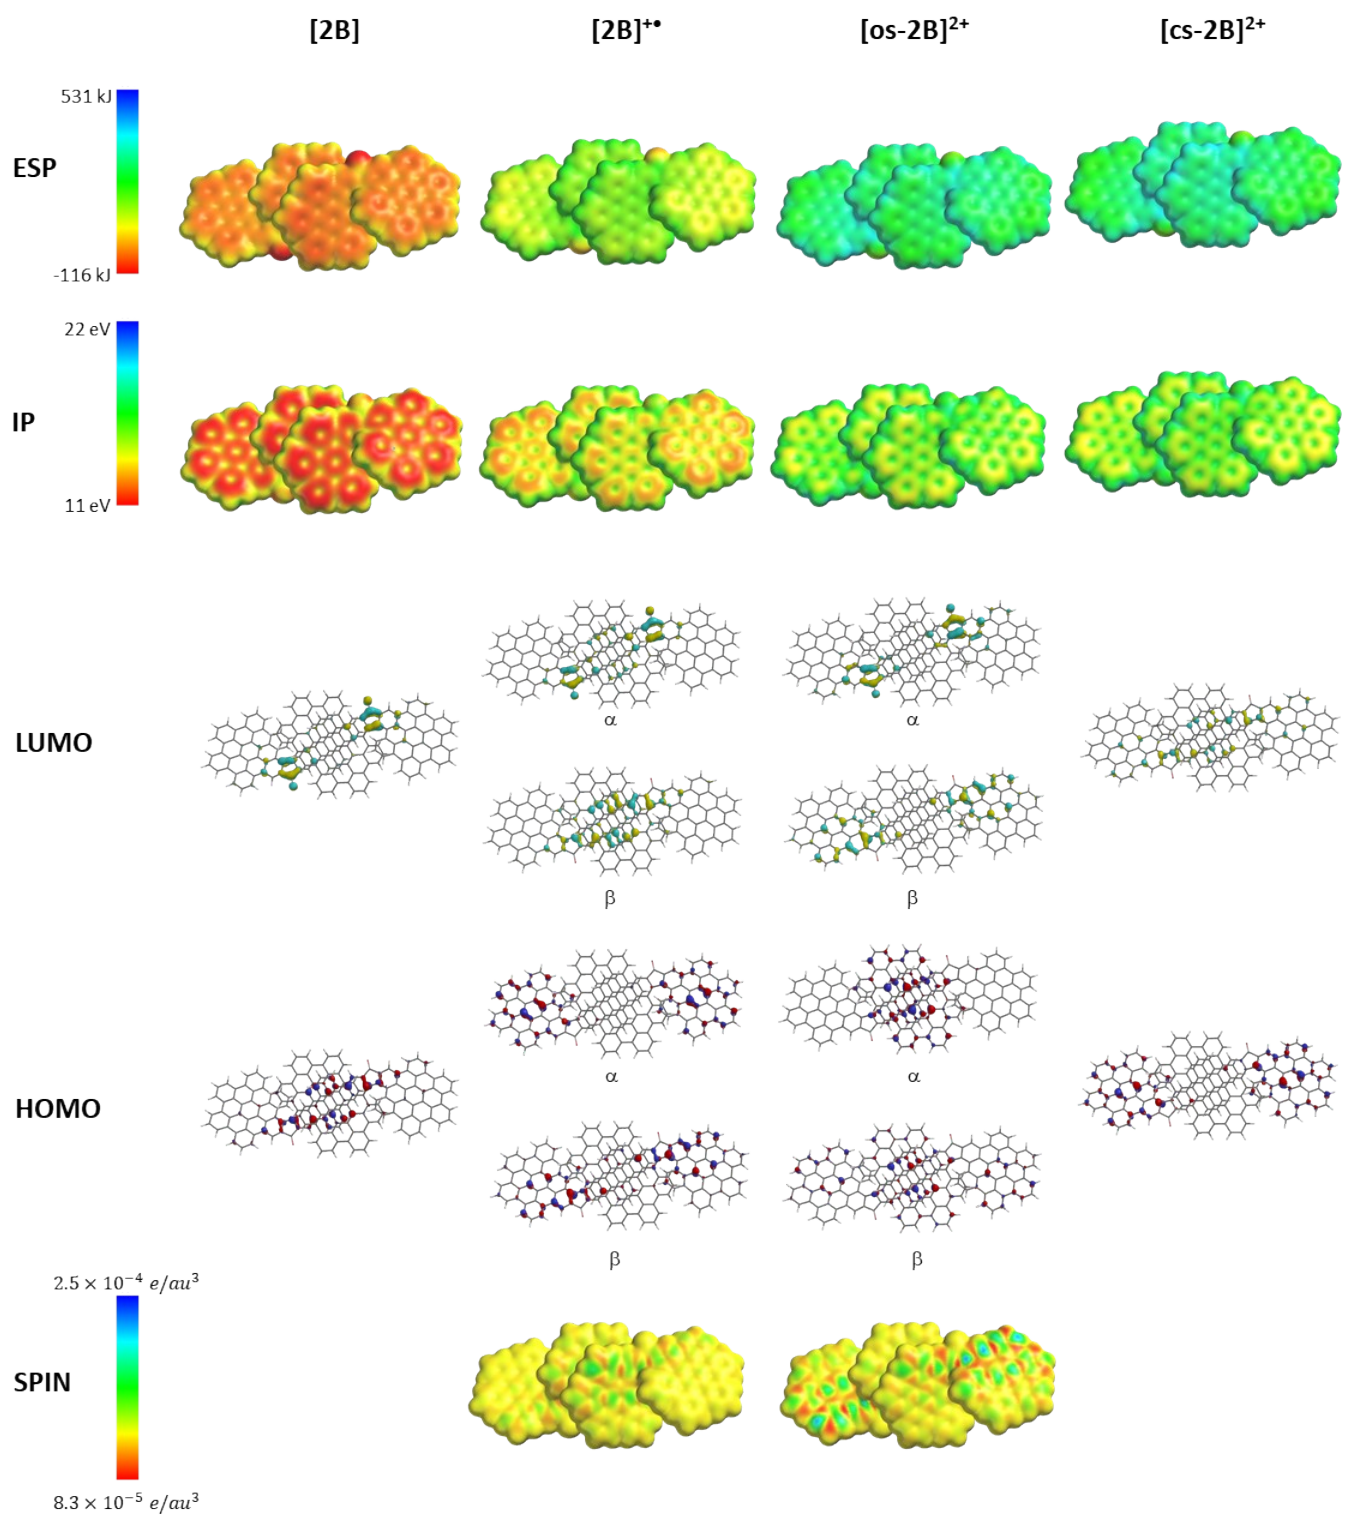

**Figure S7:** Visualization and comparison of different surfaces of each calculated molecule/ion dimer pair of **B**; ESP = electrostatic potential map, IP = ionization potential map, LUMO = lowest unoccupied molecular orbital, HOMO = highest occupied molecular orbital, SPIN = spin density map; Isovalue for density maps:  $0.002 \text{ e/au}^3$ , for orbitals:  $0.032 (\text{e/au}^3)^{0.5}$ .



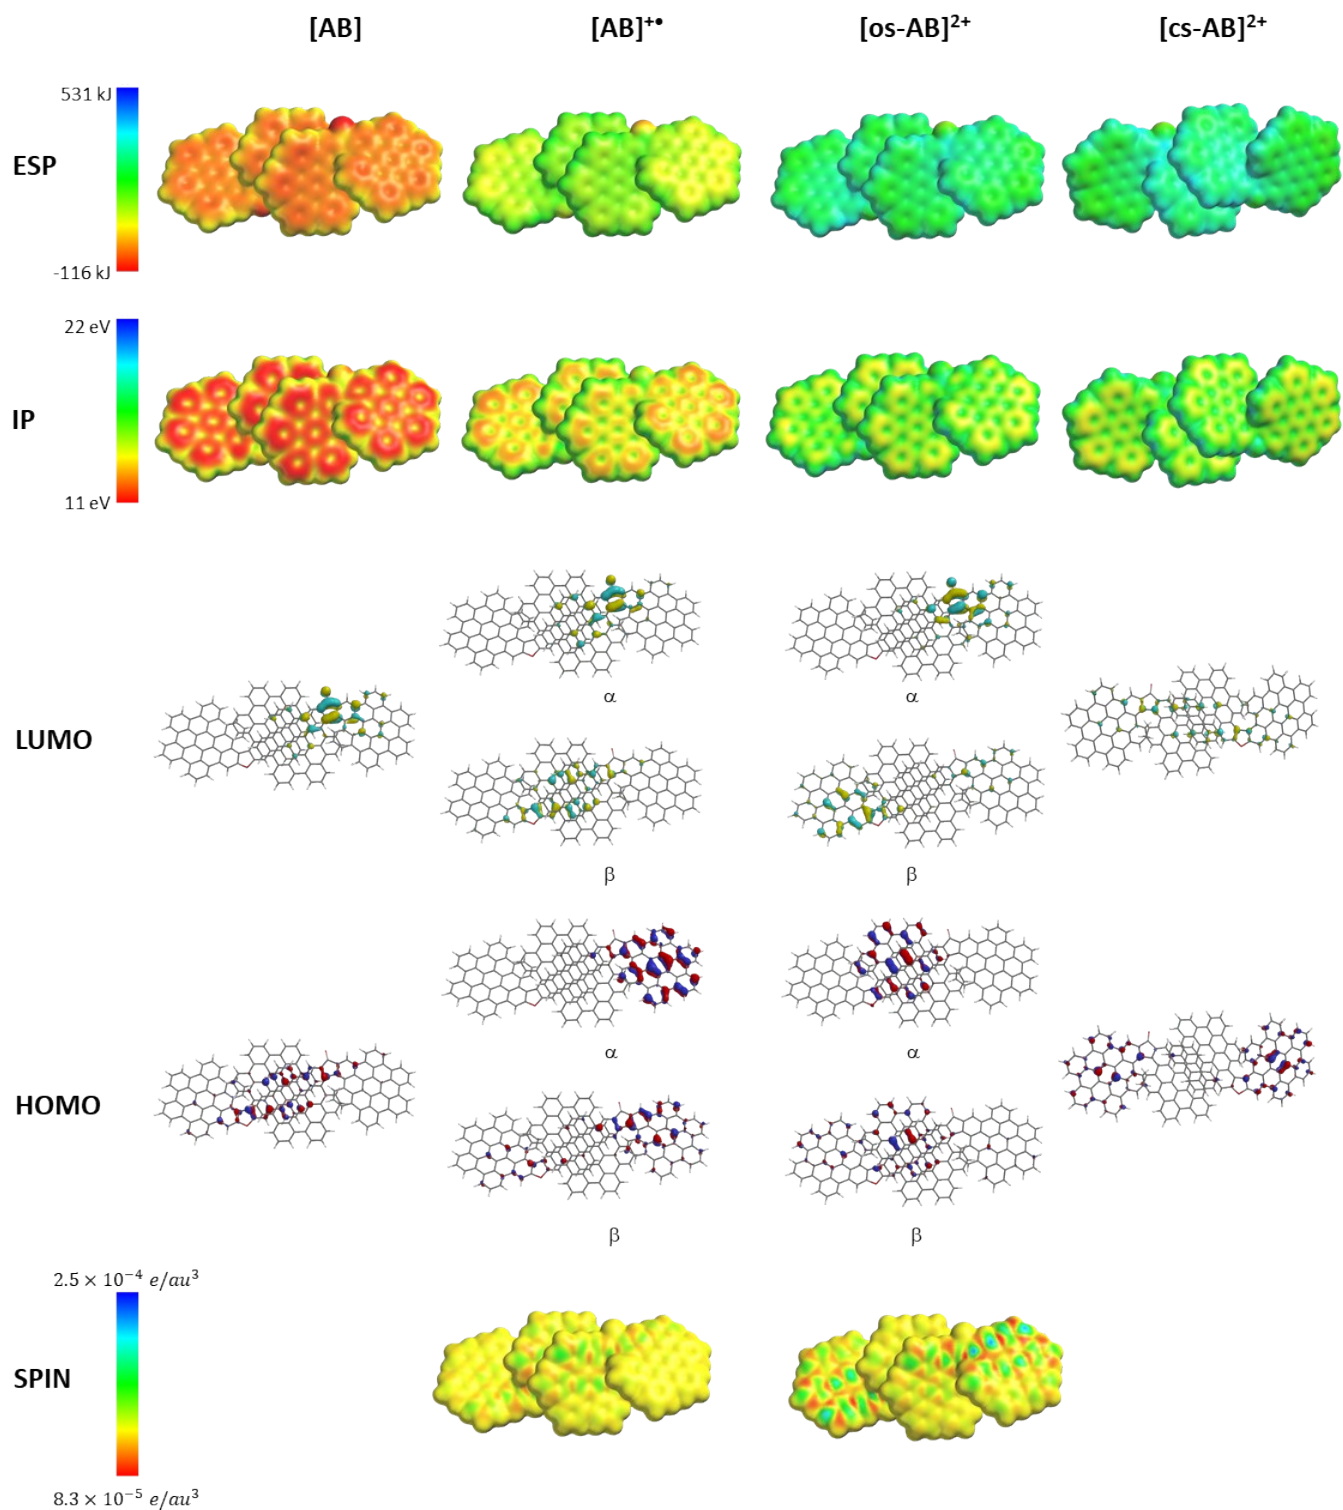

**Figure S8:** Visualization and comparison of different surfaces of each calculated molecule/ion dimer pair of **A** and **B**; ESP = electrostatic potential map, IP = ionization potential map, LUMO = lowest unoccupied molecular orbital, HOMO = highest occupied molecular orbital, SPIN = spin density map; Isovalue for density maps:  $0.002 e/au^3$ , for orbitals:  $0.032 (e/au^3)^{0.5}$ .



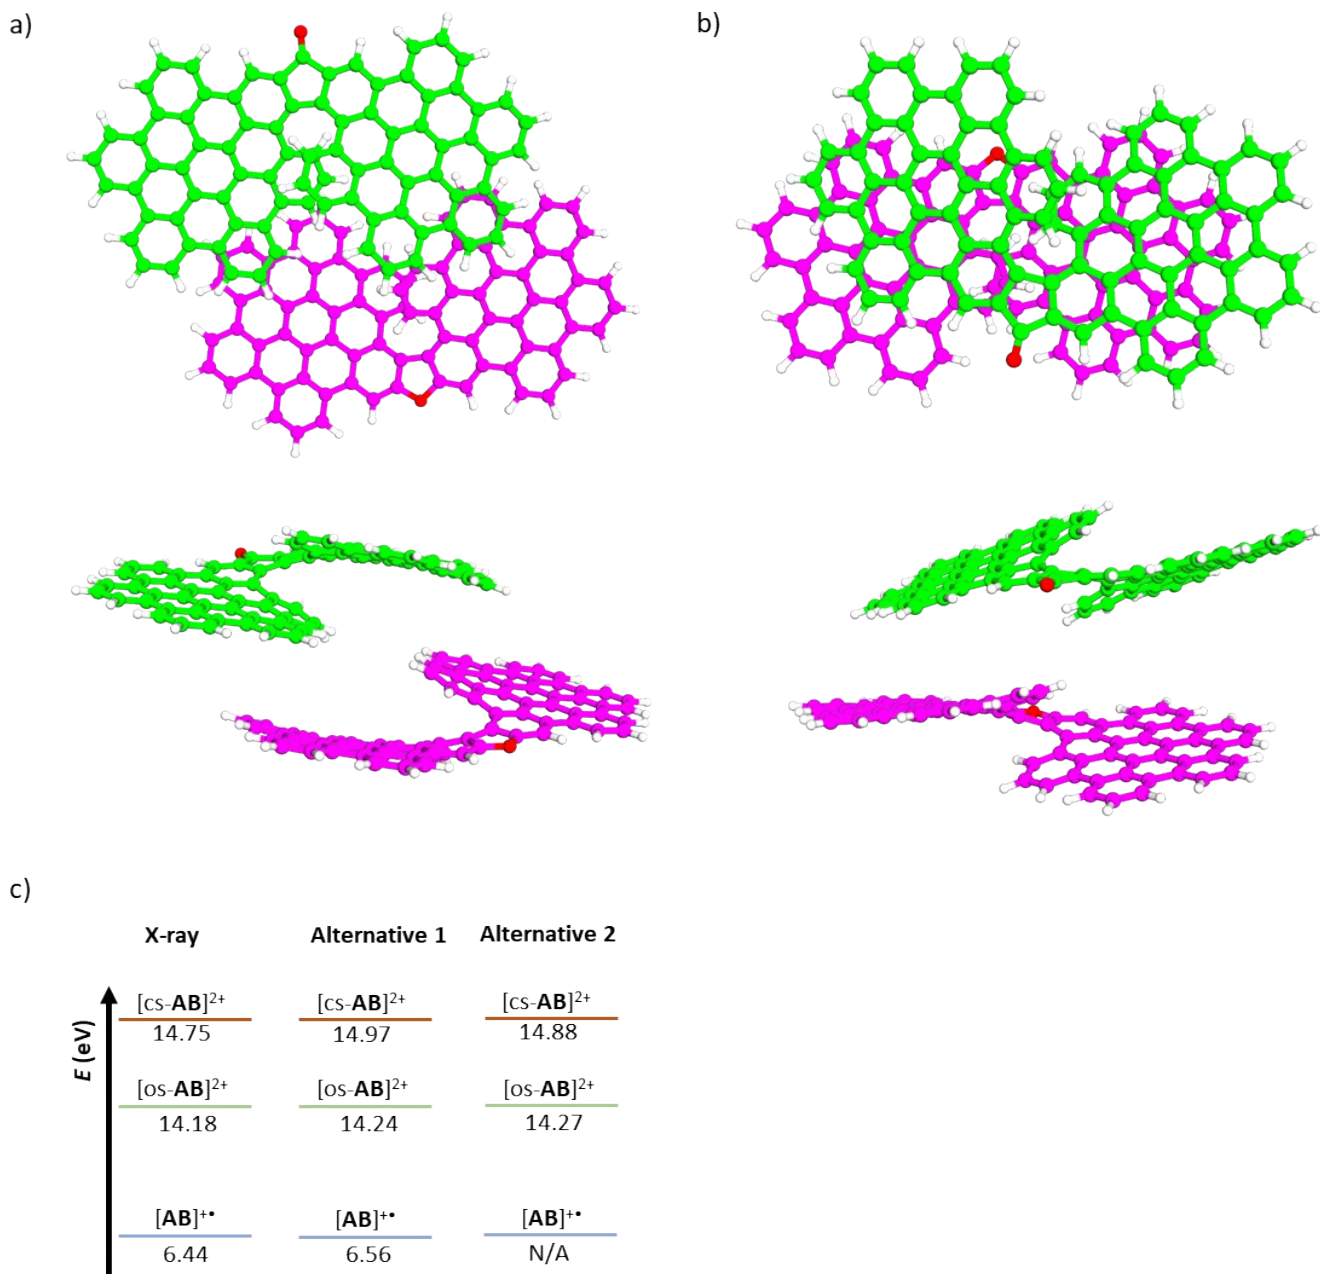

**Figure S9:** Thermochemical analysis of gas-phase dimer ions of **A** and **B** in alternative packing configurations. Alternatives are PM6 geometry optimized structures derived from t-butylated models (compare Figure S10). a) Alternative packing structure 1. b) Alternative packing structure 2. c) Thermochemical summary of gas phase dimer ions, calculated at the CAM-B3LYP/def2-SVPD[SV(P)] level of DFT; cs = closed shell, os = open shell.



Alternative Structure 1

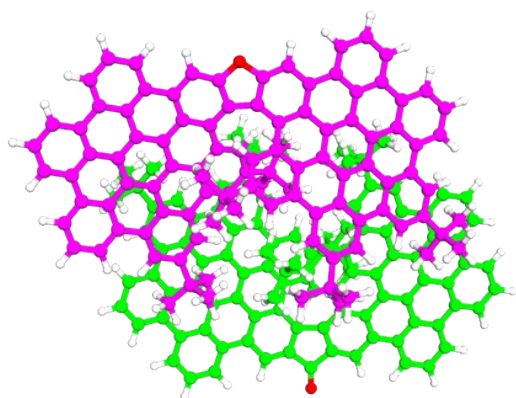

Alternative Structure 2

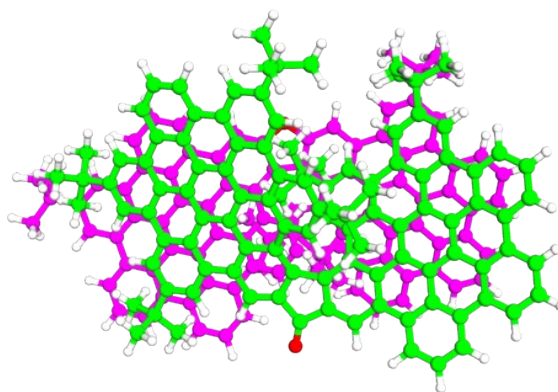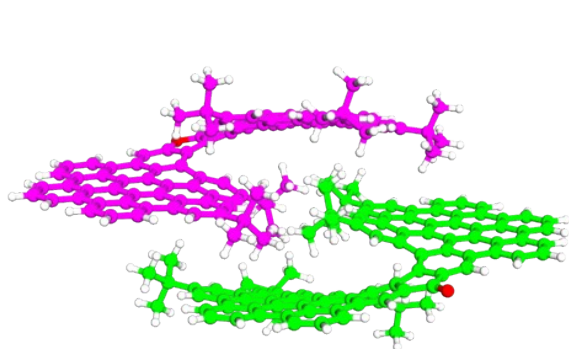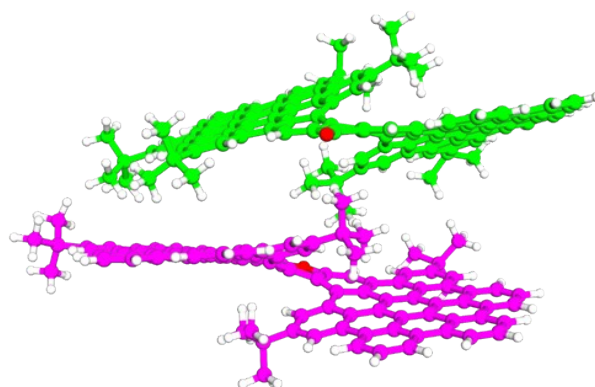

**Figure S10:** Alternative packing structures derived from PM6 geometry optimization, including *t*-Bu groups that are of relevance to the packing.

## XYZ Coordinates

[A] C<sub>92</sub>H<sub>48</sub>O

|   | X         | Y         | Z         |
|---|-----------|-----------|-----------|
| C | -1.703046 | 3.562863  | 1.795751  |
| C | -1.019595 | 4.032410  | 4.498743  |
| C | -1.239087 | 2.504344  | 2.608925  |
| C | -1.885891 | 4.846067  | 2.355271  |
| C | -1.530933 | 5.084364  | 3.702709  |
| C | -0.912869 | 2.731684  | 3.961703  |
| C | -1.938413 | 3.342498  | 0.383732  |
| C | -2.191425 | 2.983985  | -2.328424 |
| C | -2.452584 | 4.389554  | -0.428223 |
| C | -1.610353 | 2.086287  | -0.179894 |
| C | -1.556199 | 1.985843  | -1.583324 |
| C | -2.647970 | 4.168282  | -1.794941 |
| H | -3.093491 | 4.901780  | -2.453032 |
| C | -1.172406 | 1.169527  | 2.069669  |
| C | -1.461474 | -1.461490 | 1.069714  |
| C | -1.429911 | 0.946721  | 0.705418  |
| C | -0.915786 | 0.060680  | 2.905603  |
| C | -1.067390 | -1.224379 | 2.387024  |
| C | -1.613381 | -0.358359 | 0.242022  |
| H | -0.923073 | -2.077646 | 3.039047  |
| H | -1.913900 | -0.500191 | -0.785954 |
| C | -0.478306 | 1.627494  | 4.791958  |
| C | 0.344982  | -0.502409 | 6.408986  |
| C | -0.493629 | 0.302084  | 4.287047  |
| C | -0.045830 | 1.869382  | 6.117184  |
| C | 0.347780  | 0.787834  | 6.910286  |
| C | -0.064619 | -0.742077 | 5.108037  |
| H | 0.653501  | 0.940054  | 7.938040  |
| H | -0.033245 | -1.757894 | 4.733070  |
| H | 0.664938  | -1.328158 | 7.037066  |
| C | -0.578796 | 4.289120  | 5.852288  |
| C | 0.475243  | 4.831292  | 8.385809  |
| C | -0.034760 | 3.240287  | 6.633932  |
| C | -0.646590 | 5.599422  | 6.383080  |
| C | -0.101742 | 5.848604  | 7.645505  |
| C | 0.498055  | 3.538829  | 7.890404  |
| H | -0.101251 | 6.849938  | 8.058134  |
| H | 0.958178  | 2.764794  | 8.492066  |
| H | 0.909376  | 5.046841  | 9.357188  |
| C | -1.698237 | 6.404285  | 4.272176  |
| C | -2.080700 | 8.938619  | 5.397965  |
| C | -1.281061 | 6.663151  | 5.601049  |
| C | -2.292531 | 7.438677  | 3.508189  |
| C | -2.466813 | 8.696841  | 4.091198  |
| C | -1.494838 | 7.931766  | 6.145336  |
| H | -2.909493 | 9.509605  | 3.529434  |
| H | -1.217791 | 8.145837  | 7.170114  |
| H | -2.237044 | 9.919016  | 5.836975  |
| C | -2.450621 | 5.907515  | 1.549524  |
| C | -3.677048 | 7.917748  | 0.036177  |
| C | -2.698513 | 7.177463  | 2.124369  |
| C | -2.781498 | 5.674931  | 0.190456  |
| C | -3.400062 | 6.690996  | -0.541482 |
| C | -3.321231 | 8.161260  | 1.351286  |
| H | -3.683218 | 6.531573  | -1.574625 |
| H | -3.544861 | 9.133907  | 1.770761  |
| H | -4.169057 | 8.691756  | -0.544384 |
| C | -1.069880 | 1.033140  | -2.577120 |
| C | -0.912095 | -0.494416 | -4.934116 |
| C | -1.643610 | 1.453019  | -3.781327 |
| C | -0.172341 | -0.050852 | -2.625926 |
| C | -0.198715 | -0.885194 | -3.768877 |
| C | -1.581059 | 0.733391  | -4.953599 |
| H | -2.086830 | 1.114597  | -5.830428 |
| C | -0.915879 | -1.381462 | -6.098831 |
| C | -1.001056 | -3.114169 | -8.291184 |
| C | -1.500338 | -0.986888 | -7.304541 |
| C | -0.335556 | -2.671674 | -6.001949 |
| C | -0.412099 | -3.557620 | -7.103493 |
| C | -1.530682 | -1.839600 | -8.394461 |
| H | -1.929733 | 0.001625  | -7.411079 |
| H | -1.974291 | -1.510301 | -9.328840 |
| H | -1.043311 | -3.757827 | -9.160816 |
| C | 0.357497  | -3.073287 | -4.796291 |
| C | 1.831389  | -3.799159 | -2.493607 |

|   |           |           |           |
|---|-----------|-----------|-----------|
| C | 0.925189  | -4.364399 | -4.694487 |
| C | 0.482412  | -2.163022 | -3.724151 |
| C | 1.237008  | -2.523157 | -2.584945 |
| C | 1.642258  | -4.735899 | -3.532388 |
| C | 0.121541  | -4.916469 | -6.977340 |
| C | 1.145971  | -7.508530 | -6.729896 |
| C | -0.011488 | -5.845634 | -8.012485 |
| C | 0.774166  | -5.307591 | -5.782004 |
| C | 1.284369  | -6.623482 | -5.657945 |
| C | 0.500710  | -7.125505 | -7.892689 |
| H | -0.524571 | -5.582546 | -8.928827 |
| H | 0.395633  | -7.830289 | -8.711675 |
| H | 1.548433  | -8.512090 | -6.672932 |
| C | 1.466894  | -1.548698 | -1.548266 |
| C | 2.227204  | 0.527435  | 0.217420  |
| C | 2.379975  | -1.804965 | -0.502329 |
| C | 0.833859  | -0.294371 | -1.604345 |
| C | 1.255672  | 0.729565  | -0.752394 |
| C | 2.739326  | -0.763408 | 0.351006  |
| H | 0.829968  | 1.713793  | -0.883875 |
| H | 3.483654  | -0.942527 | 1.117718  |
| C | 2.633824  | -4.137911 | -1.336337 |
| C | 4.172196  | -4.800853 | 0.905441  |
| C | 3.144934  | -5.449002 | -1.189762 |
| C | 2.917068  | -3.158489 | -0.350824 |
| C | 3.672004  | -3.517166 | 0.766951  |
| C | 3.919772  | -5.753305 | -0.066620 |
| H | 3.864402  | -2.796892 | 1.552963  |
| H | 4.341952  | -6.742090 | 0.062106  |
| H | 4.763349  | -5.061369 | 1.778018  |
| C | 2.167308  | -6.077250 | -3.395262 |
| C | 3.034598  | -8.716895 | -3.059997 |
| C | 1.953434  | -7.030611 | -4.419759 |
| C | 2.864534  | -6.452610 | -2.219856 |
| C | 3.277636  | -7.778928 | -2.071678 |
| C | 2.387006  | -8.344600 | -4.225121 |
| H | 3.785153  | -8.101362 | -1.171148 |
| H | 2.209789  | -9.102037 | -4.978245 |
| H | 3.353050  | -9.745476 | -2.921632 |
| C | 2.768324  | 1.662292  | 1.094940  |
| C | 2.042999  | 2.989842  | 0.836327  |
| H | 2.179008  | 3.335396  | -0.194586 |
| H | 2.445191  | 3.762942  | 1.499750  |
| H | 0.970345  | 2.912106  | 1.037216  |
| C | 2.598828  | 1.305334  | 2.581845  |
| H | 3.134200  | 0.388570  | 2.850442  |
| H | 1.544810  | 1.161041  | 2.827202  |
| H | 2.987083  | 2.113423  | 3.212017  |
| C | 4.264082  | 1.856813  | 0.780330  |
| H | 4.412678  | 2.098478  | -0.277799 |
| H | 4.844945  | 0.955470  | 1.003713  |
| H | 4.673478  | 2.677197  | 1.381142  |
| C | -1.749293 | -2.892353 | 0.599724  |
| C | -2.931023 | -3.448224 | 1.417537  |
| H | -2.699333 | -3.486899 | 2.487333  |
| H | -3.173315 | -4.465757 | 1.089561  |
| H | -3.822315 | -2.824358 | 1.289257  |
| C | -2.120842 | -2.948757 | -0.888546 |
| H | -1.318046 | -2.560600 | -1.522775 |
| H | -3.035567 | -2.385061 | -1.103245 |
| H | -2.297373 | -3.988762 | -1.182659 |
| C | -0.511161 | -3.779115 | 0.817481  |
| H | -0.209062 | -3.817501 | 1.869266  |
| H | 0.336966  | -3.407520 | 0.238988  |
| H | -0.719467 | -4.805223 | 0.494051  |
| O | -2.287237 | 2.651328  | -3.650574 |

[A]<sup>+</sup> C<sub>92</sub>H<sub>48</sub>O

|   | X         | Y         | Z         |
|---|-----------|-----------|-----------|
| C | -1.676713 | 3.542740  | 1.773133  |
| C | -1.021803 | 3.971887  | 4.493225  |
| C | -1.242614 | 2.466433  | 2.579252  |
| C | -1.839507 | 4.824701  | 2.339216  |
| C | -1.503138 | 5.044830  | 3.696813  |
| C | -0.925379 | 2.676825  | 3.945126  |
| C | -1.899442 | 3.337754  | 0.363556  |
| C | -2.216878 | 3.005709  | -2.367830 |
| C | -2.398390 | 4.401932  | -0.447528 |
| C | -1.622483 | 2.074001  | -0.200774 |
| C | -1.576388 | 1.983017  | -1.622801 |
| C | -2.628801 | 4.186102  | -1.828917 |
| H | -3.063050 | 4.935797  | -2.474671 |
| C | -1.190408 | 1.145853  | 2.028872  |
| C | -1.483708 | -1.478107 | 0.991673  |
| C | -1.460815 | 0.932717  | 0.658657  |
| C | -0.917158 | 0.024091  | 2.848076  |
| C | -1.076261 | -1.248394 | 2.314728  |
| C | -1.644510 | -0.372962 | 0.178414  |
| H | -0.932468 | -2.108659 | 2.957108  |
| H | -1.963022 | -0.505492 | -0.845495 |
| C | -0.497057 | 1.562141  | 4.760724  |
| C | 0.382187  | -0.582540 | 6.327709  |
| C | -0.485771 | 0.246212  | 4.229685  |
| C | -0.080649 | 1.784268  | 6.094862  |
| C | 0.347731  | 0.693441  | 6.859345  |
| C | -0.028268 | -0.804895 | 5.022720  |
| H | 0.661658  | 0.827561  | 7.886325  |
| H | 0.029837  | -1.811333 | 4.626070  |
| H | 0.730656  | -1.411999 | 6.934593  |
| C | -0.620370 | 4.205502  | 5.862340  |
| C | 0.278358  | 4.683695  | 8.467368  |
| C | -0.115834 | 3.138794  | 6.646555  |
| C | -0.702522 | 5.507088  | 6.413463  |
| C | -0.239043 | 5.722957  | 7.712575  |
| C | 0.332742  | 3.404906  | 7.943322  |
| H | -0.264018 | 6.711351  | 8.152860  |
| H | 0.740154  | 2.615264  | 8.561438  |
| H | 0.639834  | 4.872875  | 9.472877  |
| C | -1.649911 | 6.361558  | 4.271231  |
| C | -1.963450 | 8.906090  | 5.392077  |
| C | -1.266882 | 6.597729  | 5.615457  |
| C | -2.184214 | 7.421576  | 3.495287  |
| C | -2.324968 | 8.684660  | 4.075539  |
| C | -1.442827 | 7.873708  | 6.153792  |
| H | -2.717339 | 9.517900  | 3.506787  |
| H | -1.181270 | 8.080111  | 7.183430  |
| H | -2.087705 | 9.891516  | 5.829051  |
| C | -2.357594 | 5.899763  | 1.532249  |
| C | -3.480718 | 7.961582  | -0.007024 |
| C | -2.566993 | 7.177321  | 2.104510  |
| C | -2.680255 | 5.682478  | 0.163255  |
| C | -3.246473 | 6.730190  | -0.582186 |
| C | -3.137006 | 8.182539  | 1.319233  |
| H | -3.516455 | 6.590162  | -1.620711 |
| H | -3.329763 | 9.162325  | 1.736684  |
| H | -3.927907 | 8.759157  | -0.590534 |
| C | -1.063394 | 1.082725  | -2.596071 |
| C | -0.954097 | -0.505911 | -4.913043 |
| C | -1.648095 | 1.493459  | -3.821161 |
| C | -0.155227 | -0.015706 | -2.632295 |
| C | -0.219865 | -0.879365 | -3.746614 |
| C | -1.611421 | 0.748744  | -4.960211 |
| H | -2.124925 | 1.107861  | -5.840424 |
| C | -0.996518 | -1.410797 | -6.040519 |
| C | -1.159627 | -3.194355 | -8.181272 |
| C | -1.644208 | -1.049040 | -7.233437 |
| C | -0.400385 | -2.698836 | -5.935846 |
| C | -0.511243 | -3.608052 | -7.014832 |
| C | -1.714189 | -1.927100 | -8.294660 |
| H | -2.094495 | -0.071664 | -7.347245 |
| H | -2.207283 | -1.631998 | -9.214710 |
| H | -1.235998 | -3.858506 | -9.032460 |
| C | 0.329264  | -3.071694 | -4.750911 |
| C | 1.855329  | -3.754204 | -2.462983 |
| C | 0.913317  | -4.356959 | -4.642490 |
| C | 0.470160  | -2.144353 | -3.697167 |
| C | 1.247912  | -2.476989 | -2.565280 |

|   |           |           |           |
|---|-----------|-----------|-----------|
| C | 1.658731  | -4.704874 | -3.484777 |
| C | 0.048793  | -4.953758 | -6.889561 |
| C | 1.127889  | -7.521516 | -6.637706 |
| C | -0.099579 | -5.898318 | -7.908203 |
| C | 0.747832  | -5.315435 | -5.709816 |
| C | 1.288068  | -6.620007 | -5.584026 |
| C | 0.438528  | -7.166338 | -7.784591 |
| H | -0.641967 | -5.660254 | -8.814129 |
| H | 0.319755  | -7.885334 | -8.588588 |
| H | 1.544311  | -8.518724 | -6.580642 |
| C | 1.480194  | -1.492351 | -1.552303 |
| C | 2.220462  | 0.610817  | 0.201127  |
| C | 2.383756  | -1.738018 | -0.490673 |
| C | 0.847315  | -0.231116 | -1.623900 |
| C | 1.261173  | 0.805960  | -0.773651 |
| C | 2.733359  | -0.687154 | 0.346958  |
| H | 0.843671  | 1.791490  | -0.921256 |
| H | 3.475445  | -0.855244 | 1.117846  |
| C | 2.661982  | -4.073795 | -1.306078 |
| C | 4.175391  | -4.713450 | 0.958854  |
| C | 3.187959  | -5.378285 | -1.151169 |
| C | 2.925896  | -3.087401 | -0.321050 |
| C | 3.667646  | -3.432701 | 0.807653  |
| C | 3.946570  | -5.670737 | -0.012360 |
| H | 3.845882  | -2.708963 | 1.593880  |
| H | 4.369847  | -6.656255 | 0.131664  |
| H | 4.754612  | -4.966012 | 1.841218  |
| C | 2.211105  | -6.034114 | -3.346836 |
| C | 3.182170  | -8.639185 | -3.030176 |
| C | 2.004871  | -6.997039 | -4.363840 |
| C | 2.936595  | -6.385669 | -2.181701 |
| C | 3.406950  | -7.694974 | -2.045148 |
| C | 2.491878  | -8.292545 | -4.179413 |
| H | 3.952460  | -7.997965 | -1.160850 |
| H | 2.331866  | -9.056939 | -4.928807 |
| H | 3.548583  | -9.652673 | -2.903558 |
| C | 2.762842  | 1.746509  | 1.074822  |
| C | 2.033262  | 3.071185  | 0.815977  |
| H | 2.169561  | 3.420157  | -0.213546 |
| H | 2.433294  | 3.844173  | 1.479464  |
| H | 0.960896  | 2.989640  | 1.018374  |
| C | 2.598320  | 1.389295  | 2.562975  |
| H | 3.141843  | 0.478815  | 2.835233  |
| H | 1.546255  | 1.239059  | 2.815363  |
| H | 2.984813  | 2.201545  | 3.187969  |
| C | 4.257598  | 1.942426  | 0.754190  |
| H | 4.402308  | 2.192472  | -0.302205 |
| H | 4.842342  | 1.042195  | 0.970449  |
| H | 4.667484  | 2.758993  | 1.358774  |
| C | -1.776225 | -2.906730 | 0.521613  |
| C | -2.961749 | -3.456988 | 1.338554  |
| H | -2.737672 | -3.489979 | 2.409891  |
| H | -3.199682 | -4.476648 | 1.016287  |
| H | -3.853860 | -2.837214 | 1.199945  |
| C | -2.145203 | -2.959045 | -0.966932 |
| H | -1.340142 | -2.570180 | -1.598389 |
| H | -3.061082 | -2.397554 | -1.182364 |
| H | -2.321046 | -3.997852 | -1.263225 |
| C | -0.540283 | -3.797118 | 0.742525  |
| H | -0.243319 | -3.844183 | 1.795107  |
| H | 0.314236  | -3.429456 | 0.169752  |
| H | -0.753029 | -4.820440 | 0.414970  |
| O | -2.301737 | 2.682114  | -3.689129 |

[osA]<sup>2+</sup> C<sub>92</sub>H<sub>48</sub>O

|   | X         | Y         | Z         |
|---|-----------|-----------|-----------|
| C | -1.715364 | 3.565701  | 1.792511  |
| C | -1.013052 | 4.076960  | 4.495188  |
| C | -1.254790 | 2.507752  | 2.620592  |
| C | -1.903187 | 4.875255  | 2.353226  |
| C | -1.532488 | 5.124955  | 3.688321  |
| C | -0.925411 | 2.743166  | 3.964417  |
| C | -1.949198 | 3.339908  | 0.403418  |
| C | -2.194652 | 2.968691  | -2.306219 |
| C | -2.480753 | 4.385478  | -0.419703 |
| C | -1.614685 | 2.072010  | -0.157366 |
| C | -1.549475 | 1.972349  | -1.562721 |
| C | -2.666109 | 4.157377  | -1.777600 |
| H | -3.108708 | 4.883290  | -2.445968 |
| C | -1.200268 | 1.174337  | 2.095645  |
| C | -1.473274 | -1.469372 | 1.103860  |
| C | -1.440844 | 0.943735  | 0.728682  |
| C | -0.960811 | 0.071640  | 2.943372  |
| C | -1.101289 | -1.222009 | 2.423800  |
| C | -1.614479 | -0.366749 | 0.269424  |
| H | -0.965632 | -2.071054 | 3.082035  |
| H | -1.909652 | -0.515472 | -0.759225 |
| C | -0.522031 | 1.654013  | 4.806496  |
| C | 0.159579  | -0.475699 | 6.486584  |
| C | -0.575235 | 0.317124  | 4.322973  |
| C | -0.097503 | 1.907165  | 6.136843  |
| C | 0.219219  | 0.833787  | 6.959530  |
| C | -0.221105 | -0.730648 | 5.187019  |
| H | 0.502296  | 0.992555  | 7.992472  |
| H | -0.239775 | -1.757910 | 4.846239  |
| H | 0.414606  | -1.296904 | 7.147984  |
| C | -0.559401 | 4.341880  | 5.820101  |
| C | 0.579367  | 4.917227  | 8.305624  |
| C | -0.022737 | 3.289720  | 6.618389  |
| C | -0.591047 | 5.672583  | 6.330821  |
| C | 0.000592  | 5.932867  | 7.574639  |
| C | 0.557309  | 3.603260  | 7.837733  |
| H | 0.035239  | 6.938540  | 7.972434  |
| H | 1.021779  | 2.836451  | 8.444784  |
| H | 1.052194  | 5.138529  | 9.256606  |
| C | -1.686933 | 6.443457  | 4.242969  |
| C | -2.042597 | 8.999765  | 5.344894  |
| C | -1.233716 | 6.719692  | 5.555086  |
| C | -2.302091 | 7.465289  | 3.480860  |
| C | -2.465553 | 8.739515  | 4.057102  |
| C | -1.431578 | 7.999456  | 6.087709  |
| H | -2.925288 | 9.544192  | 3.498823  |
| H | -1.125594 | 8.228749  | 7.100325  |
| H | -2.186676 | 9.983978  | 5.776378  |
| C | -2.479884 | 5.913031  | 1.553209  |
| C | -3.767781 | 7.897327  | 0.052906  |
| C | -2.733100 | 7.189203  | 2.125324  |
| C | -2.827943 | 5.667230  | 0.195936  |
| C | -3.476036 | 6.661038  | -0.524576 |
| C | -3.392647 | 8.162211  | 1.348965  |
| H | -3.779647 | 6.495235  | -1.550718 |
| H | -3.625748 | 9.134415  | 1.762019  |
| H | -4.285561 | 8.652983  | -0.527883 |
| C | -1.059789 | 1.026857  | -2.555106 |
| C | -0.896919 | -0.484575 | -4.925869 |
| C | -1.635250 | 1.453333  | -3.762969 |
| C | -0.166450 | -0.062758 | -2.608474 |
| C | -0.194270 | -0.888418 | -3.758596 |
| C | -1.571624 | 0.749403  | -4.936792 |
| H | -2.074815 | 1.137458  | -5.811650 |
| C | -0.890222 | -1.346160 | -6.091976 |
| C | -0.961086 | -3.063725 | -8.297239 |
| C | -1.447074 | -0.928549 | -7.312488 |
| C | -0.327232 | -2.647358 | -5.998776 |
| C | -0.414180 | -3.528373 | -7.106981 |
| C | -1.464497 | -1.768743 | -8.403123 |
| H | -1.854179 | 0.068081  | -7.423019 |
| H | -1.875037 | -1.426461 | -9.346857 |
| H | -0.991547 | -3.694243 | -9.176667 |
| C | 0.359790  | -3.054226 | -4.806433 |
| C | 1.866873  | -3.824495 | -2.516661 |
| C | 0.940130  | -4.368753 | -4.719491 |
| C | 0.486369  | -2.160072 | -3.729752 |
| C | 1.254223  | -2.529634 | -2.591041 |

|   |           |           |           |
|---|-----------|-----------|-----------|
| C | 1.670892  | -4.749462 | -3.556192 |
| C | 0.075800  | -4.901871 | -6.975606 |
| C | 1.048085  | -7.524671 | -6.726085 |
| C | -0.136064 | -5.841540 | -7.974784 |
| C | 0.768518  | -5.294274 | -5.791783 |
| C | 1.274477  | -6.624507 | -5.678771 |
| C | 0.346290  | -7.141215 | -7.850631 |
| H | -0.694402 | -5.587892 | -8.866602 |
| H | 0.168733  | -7.857508 | -8.645855 |
| H | 1.412146  | -8.541769 | -6.673867 |
| C | 1.470611  | -1.583288 | -1.551459 |
| C | 2.229004  | 0.474344  | 0.238747  |
| C | 2.383769  | -1.853136 | -0.496094 |
| C | 0.834198  | -0.318519 | -1.593953 |
| C | 1.254665  | 0.690416  | -0.725555 |
| C | 2.743327  | -0.823566 | 0.360482  |
| H | 0.838455  | 1.679463  | -0.847485 |
| H | 3.492780  | -1.005130 | 1.120557  |
| C | 2.661398  | -4.169214 | -1.372028 |
| C | 4.166089  | -4.873169 | 0.885441  |
| C | 3.192232  | -5.479625 | -1.248478 |
| C | 2.923252  | -3.206517 | -0.359667 |
| C | 3.655663  | -3.581354 | 0.758111  |
| C | 3.946347  | -5.803437 | -0.102886 |
| H | 3.832983  | -2.878627 | 1.563024  |
| H | 4.366918  | -6.792064 | 0.021838  |
| H | 4.739867  | -5.141940 | 1.765919  |
| C | 2.219774  | -6.075519 | -3.449705 |
| C | 3.240695  | -8.679247 | -3.210784 |
| C | 2.011657  | -7.016646 | -4.486392 |
| C | 2.955142  | -6.449565 | -2.298070 |
| C | 3.452832  | -7.763412 | -2.202982 |
| C | 2.528747  | -8.308228 | -4.343997 |
| H | 4.013603  | -8.080821 | -1.334091 |
| H | 2.385927  | -9.051116 | -5.117615 |
| H | 3.630784  | -9.687157 | -3.122393 |
| C | 2.776637  | 1.594668  | 1.126032  |
| C | 2.058788  | 2.929008  | 0.883232  |
| H | 2.197312  | 3.289167  | -0.141778 |
| H | 2.468343  | 3.690028  | 1.554580  |
| H | 0.985403  | 2.854555  | 1.085313  |
| C | 2.606492  | 1.216360  | 2.608951  |
| H | 3.143516  | 0.298704  | 2.868973  |
| H | 1.551828  | 1.071084  | 2.855708  |
| H | 2.999790  | 2.016677  | 3.244535  |
| C | 4.274109  | 1.781572  | 0.808807  |
| H | 4.423432  | 2.041535  | -0.244112 |
| H | 4.853028  | 0.876554  | 1.018703  |
| H | 4.687338  | 2.589536  | 1.421688  |
| C | -1.754625 | -2.902695 | 0.637743  |
| C | -2.953088 | -3.450162 | 1.437529  |
| H | -2.745511 | -3.481792 | 2.512139  |
| H | -3.186985 | -4.470126 | 1.114601  |
| H | -3.843133 | -2.831334 | 1.284089  |
| C | -2.099756 | -2.964816 | -0.856678 |
| H | -1.288636 | -2.573875 | -1.479993 |
| H | -3.015174 | -2.410318 | -1.090170 |
| H | -2.267313 | -4.006057 | -1.148569 |
| C | -0.520606 | -3.788067 | 0.887061  |
| H | -0.241903 | -3.825031 | 1.945041  |
| H | 0.342777  | -3.423239 | 0.324955  |
| H | -0.726795 | -4.814980 | 0.567538  |
| O | -2.284531 | 2.646988  | -3.618561 |

[csA]<sup>2+</sup> C<sub>92</sub>H<sub>48</sub>O

|   | X         | Y         | Z         |
|---|-----------|-----------|-----------|
| C | -1.658175 | 3.542986  | 1.761111  |
| C | -1.023877 | 3.956928  | 4.499482  |
| C | -1.241935 | 2.457556  | 2.569456  |
| C | -1.817394 | 4.823152  | 2.328376  |
| C | -1.493749 | 5.039413  | 3.698853  |
| C | -0.929240 | 2.665452  | 3.949752  |
| C | -1.869594 | 3.342396  | 0.355670  |
| C | -2.227995 | 3.018711  | -2.388274 |
| C | -2.363764 | 4.412805  | -0.454822 |
| C | -1.620406 | 2.071389  | -0.206294 |
| C | -1.583828 | 1.976909  | -1.640969 |
| C | -2.611019 | 4.196004  | -1.850919 |
| H | -3.035922 | 4.954390  | -2.491912 |
| C | -1.195414 | 1.151221  | 2.020485  |
| C | -1.489403 | -1.472740 | 0.968678  |
| C | -1.470718 | 0.937998  | 0.641555  |
| C | -0.911383 | 0.020472  | 2.836808  |
| C | -1.074751 | -1.242015 | 2.300329  |
| C | -1.651305 | -0.373037 | 0.158506  |
| H | -0.933188 | -2.105276 | 2.938789  |
| H | -1.979012 | -0.505090 | -0.862370 |
| C | -0.505841 | 1.551597  | 4.759429  |
| C | 0.385863  | -0.594871 | 6.316840  |
| C | -0.480386 | 0.237099  | 4.219978  |
| C | -0.100969 | 1.768450  | 6.099614  |
| C | 0.336084  | 0.673376  | 6.858305  |
| C | -0.016635 | -0.812367 | 5.004842  |
| H | 0.645418  | 0.801683  | 7.886896  |
| H | 0.053029  | -1.816479 | 4.604313  |
| H | 0.738021  | -1.426007 | 6.918587  |
| C | -0.643355 | 4.184076  | 5.873052  |
| C | 0.195139  | 4.643457  | 8.503372  |
| C | -0.153970 | 3.113133  | 6.660212  |
| C | -0.734873 | 5.482056  | 6.430186  |
| C | -0.302486 | 5.688694  | 7.741041  |
| C | 0.262816  | 3.370034  | 7.972110  |
| H | -0.338469 | 6.673000  | 8.189038  |
| H | 0.651536  | 2.576258  | 8.596293  |
| H | 0.529171  | 4.826208  | 9.518908  |
| C | -1.638117 | 6.348217  | 4.271876  |
| C | -1.948865 | 8.890769  | 5.394166  |
| C | -1.275666 | 6.577437  | 5.626863  |
| C | -2.151131 | 7.418767  | 3.488340  |
| C | -2.290720 | 8.678818  | 4.069238  |
| C | -1.450151 | 7.853442  | 6.163548  |
| H | -2.666411 | 9.519335  | 3.500576  |
| H | -1.204089 | 8.058673  | 7.196723  |
| H | -2.072156 | 9.875684  | 5.831784  |
| C | -2.312002 | 5.896527  | 1.522843  |
| C | -3.394308 | 7.972749  | -0.038201 |
| C | -2.513447 | 7.178693  | 2.092552  |
| C | -2.626184 | 5.681787  | 0.145072  |
| C | -3.174988 | 6.745595  | -0.610456 |
| C | -3.059728 | 8.184917  | 1.299870  |
| H | -3.436910 | 6.611933  | -1.651145 |
| H | -3.245331 | 9.167875  | 1.713126  |
| H | -3.822509 | 8.780350  | -0.621089 |
| C | -1.061277 | 1.105803  | -2.598687 |
| C | -0.979889 | -0.519491 | -4.900145 |
| C | -1.654061 | 1.511496  | -3.841056 |
| C | -0.152852 | -0.008942 | -2.630510 |
| C | -0.240057 | -0.887465 | -3.732259 |
| C | -1.634454 | 0.755267  | -4.958851 |
| H | -2.154620 | 1.102827  | -5.839270 |
| C | -1.037997 | -1.421165 | -6.005830 |
| C | -1.224746 | -3.219523 | -8.130686 |
| C | -1.710880 | -1.067591 | -7.200009 |
| C | -0.432698 | -2.711844 | -5.903272 |
| C | -0.555903 | -3.626575 | -6.979033 |
| C | -1.793620 | -1.950363 | -8.246668 |
| H | -2.168034 | -0.094241 | -7.314246 |
| H | -2.303270 | -1.669701 | -9.161547 |
| H | -1.313222 | -3.886831 | -8.978241 |
| C | 0.309489  | -3.073230 | -4.735293 |
| C | 1.866670  | -3.750815 | -2.456608 |
| C | 0.908161  | -4.361857 | -4.630382 |
| C | 0.454033  | -2.142937 | -3.686417 |
| C | 1.248277  | -2.464922 | -2.559110 |

|   |           |           |           |
|---|-----------|-----------|-----------|
| C | 1.668377  | -4.703098 | -3.473103 |
| C | 0.018541  | -4.965755 | -6.862329 |
| C | 1.134234  | -7.521771 | -6.619994 |
| C | -0.132023 | -5.911351 | -7.876253 |
| C | 0.740521  | -5.318223 | -5.688502 |
| C | 1.300204  | -6.619219 | -5.569041 |
| C | 0.424385  | -7.173482 | -7.756423 |
| H | -0.687584 | -5.684567 | -8.776759 |
| H | 0.303011  | -7.894307 | -8.558017 |
| H | 1.560028  | -8.514854 | -6.570826 |
| C | 1.479804  | -1.484784 | -1.560882 |
| C | 2.212936  | 0.629356  | 0.191088  |
| C | 2.380221  | -1.729686 | -0.486190 |
| C | 0.845092  | -0.214172 | -1.636039 |
| C | 1.258616  | 0.825834  | -0.779949 |
| C | 2.726568  | -0.679053 | 0.340661  |
| H | 0.849342  | 1.813724  | -0.933735 |
| H | 3.469525  | -0.841673 | 1.111490  |
| C | 2.673467  | -4.063741 | -1.304714 |
| C | 4.178955  | -4.700649 | 0.966403  |
| C | 3.210949  | -5.365558 | -1.152586 |
| C | 2.926122  | -3.077700 | -0.313204 |
| C | 3.660833  | -3.420085 | 0.816325  |
| C | 3.965077  | -5.655572 | -0.006639 |
| H | 3.831916  | -2.699299 | 1.606779  |
| H | 4.393722  | -6.638060 | 0.138871  |
| H | 4.755562  | -4.950084 | 1.850892  |
| C | 2.236370  | -6.023768 | -3.342558 |
| C | 3.263214  | -8.611736 | -3.047407 |
| C | 2.037470  | -6.986447 | -4.360876 |
| C | 2.976099  | -6.367837 | -2.184775 |
| C | 3.476816  | -7.669689 | -2.059965 |
| C | 2.552441  | -8.272274 | -4.188061 |
| H | 4.040059  | -7.966245 | -1.184999 |
| H | 2.403068  | -9.036498 | -4.939386 |
| H | 3.653364  | -9.617296 | -2.932092 |
| C | 2.769028  | 1.759645  | 1.059227  |
| C | 2.050262  | 3.090004  | 0.799898  |
| H | 2.187412  | 3.436823  | -0.230101 |
| H | 2.459967  | 3.860427  | 1.459949  |
| H | 0.977424  | 3.017819  | 1.006460  |
| C | 2.608024  | 1.404638  | 2.549085  |
| H | 3.142245  | 0.489182  | 2.822336  |
| H | 1.555449  | 1.269413  | 2.809290  |
| H | 3.010203  | 2.212784  | 3.168722  |
| C | 4.265013  | 1.937596  | 0.729671  |
| H | 4.408054  | 2.186564  | -0.326700 |
| H | 4.843198  | 1.033310  | 0.945182  |
| H | 4.685267  | 2.749804  | 1.331756  |
| C | -1.791244 | -2.900964 | 0.510755  |
| C | -2.975808 | -3.436617 | 1.340135  |
| H | -2.746931 | -3.466386 | 2.410250  |
| H | -3.220616 | -4.456482 | 1.025977  |
| H | -3.865534 | -2.814165 | 1.201988  |
| C | -2.168293 | -2.959915 | -0.975282 |
| H | -1.364132 | -2.578271 | -1.613131 |
| H | -3.083574 | -2.397307 | -1.189274 |
| H | -2.350877 | -3.999331 | -1.263891 |
| C | -0.557930 | -3.795764 | 0.733188  |
| H | -0.254979 | -3.839319 | 1.784008  |
| H | 0.296233  | -3.439152 | 0.152170  |
| H | -0.780585 | -4.819793 | 0.416041  |
| O | -2.308946 | 2.696585  | -3.707783 |

[B] C<sub>93</sub>H<sub>48</sub>O

|   | X         | Y         | Z         |
|---|-----------|-----------|-----------|
| C | -1.667560 | 3.498793  | 1.791013  |
| C | -0.914204 | 3.839528  | 4.495018  |
| C | -1.203280 | 2.397934  | 2.546193  |
| C | -1.813189 | 4.760656  | 2.409749  |
| C | -1.426664 | 4.932782  | 3.760327  |
| C | -0.840749 | 2.560999  | 3.898087  |
| C | -1.937310 | 3.345814  | 0.374961  |
| C | -2.196162 | 3.132157  | -2.355120 |
| C | -2.424250 | 4.444555  | -0.369789 |
| C | -1.654016 | 2.097079  | -0.257190 |
| C | -1.599790 | 2.069294  | -1.656458 |
| C | -2.629099 | 4.281791  | -1.747351 |
| H | -3.077584 | 5.047898  | -2.368119 |
| C | -1.175814 | 1.085244  | 1.948286  |
| C | -1.567540 | -1.498913 | 0.868275  |
| C | -1.489592 | 0.919537  | 0.587105  |
| C | -0.910472 | -0.057966 | 2.730910  |
| C | -1.116320 | -1.320069 | 2.174477  |
| C | -1.727157 | -0.361098 | 0.086816  |
| H | -0.971744 | -2.198272 | 2.792023  |
| H | -2.068979 | -0.457574 | -0.933986 |
| C | -0.392081 | 1.418300  | 4.666392  |
| C | 0.490579  | -0.785830 | 6.147607  |
| C | -0.428871 | 0.118765  | 4.101305  |
| C | 0.087339  | 1.596700  | 5.985366  |
| C | 0.509979  | 0.479130  | 6.710282  |
| C | 0.031715  | -0.963572 | 4.853525  |
| H | 0.856205  | 0.582600  | 7.731059  |
| H | 0.051670  | -1.958987 | 4.426462  |
| H | 0.836074  | -1.639476 | 6.722480  |
| C | -0.437404 | 4.028922  | 5.847902  |
| C | 0.674850  | 4.444052  | 8.380950  |
| C | 0.117585  | 2.941330  | 6.566629  |
| C | -0.482718 | 5.313132  | 6.441099  |
| C | 0.091049  | 5.499026  | 7.701637  |
| C | 0.677684  | 3.176273  | 7.824443  |
| H | 0.109032  | 6.479897  | 8.160047  |
| H | 1.142265  | 2.371317  | 8.380057  |
| H | 1.129789  | 4.610220  | 9.352504  |
| C | -1.565939 | 6.227413  | 4.392951  |
| C | -1.912047 | 8.704766  | 5.650313  |
| C | -1.124166 | 6.417426  | 5.725100  |
| C | -2.159564 | 7.304673  | 3.690334  |
| C | -2.318928 | 8.531946  | 4.338859  |
| C | -1.319955 | 7.658639  | 6.335805  |
| H | -2.767817 | 9.373437  | 3.826599  |
| H | -1.025764 | 7.818756  | 7.365569  |
| H | -2.057077 | 9.662137  | 6.141087  |
| C | -2.365763 | 5.870624  | 1.665733  |
| C | -3.545153 | 7.978080  | 0.250057  |
| C | -2.580068 | 7.118862  | 2.299453  |
| C | -2.710983 | 5.708753  | 0.301637  |
| C | -3.304075 | 6.772571  | -0.383977 |
| C | -3.178557 | 8.151855  | 1.574239  |
| H | -3.591833 | 6.666998  | -1.422486 |
| H | -3.370279 | 9.112013  | 2.036180  |
| H | -4.015934 | 8.791574  | -0.292940 |
| C | -1.108379 | 1.083767  | -2.675838 |
| C | -0.908165 | -0.572480 | -4.953127 |
| C | -1.703881 | 1.421531  | -3.902423 |
| C | -0.184250 | 0.030680  | -2.667303 |
| C | -0.195261 | -0.875888 | -3.770397 |
| C | -1.596703 | 0.646738  | -5.027459 |
| H | -2.090118 | 0.988068  | -5.929295 |
| C | -0.906279 | -1.515902 | -6.066634 |
| C | -0.970333 | -3.358916 | -8.164683 |
| C | -1.512856 | -1.195744 | -7.284324 |
| C | -0.300143 | -2.786075 | -5.907031 |
| C | -0.359212 | -3.726999 | -6.963706 |
| C | -1.533765 | -2.104337 | -8.326712 |
| H | -1.970455 | -0.226007 | -7.434080 |
| H | -1.998344 | -1.836661 | -9.270484 |
| H | -1.010973 | -4.048743 | -8.998063 |
| C | 0.389241  | -3.111358 | -4.677822 |
| C | 1.832035  | -3.709663 | -2.319487 |
| C | 0.969014  | -4.391543 | -4.505713 |
| C | 0.494818  | -2.145865 | -3.651167 |
| C | 1.232710  | -2.444198 | -2.482860 |

|   |           |           |           |
|---|-----------|-----------|-----------|
| C | 1.668107  | -4.698490 | -3.315915 |
| C | 0.210380  | -5.063020 | -6.773828 |
| C | 1.287638  | -7.616995 | -6.398096 |
| C | 0.125305  | -6.035220 | -7.773475 |
| C | 0.848774  | -5.386350 | -5.551048 |
| C | 1.380775  | -6.685307 | -5.360862 |
| C | 0.664818  | -7.296439 | -7.591090 |
| H | -0.366150 | -5.819698 | -8.713679 |
| H | 0.598324  | -8.034692 | -8.384151 |
| H | 1.712641  | -8.606893 | -6.290167 |
| C | 1.441233  | -1.416412 | -1.491353 |
| C | 2.193176  | 0.747059  | 0.168212  |
| C | 2.330362  | -1.622754 | -0.415847 |
| C | 0.820992  | -0.161310 | -1.628279 |
| C | 1.242043  | 0.904521  | -0.832326 |
| C | 2.688499  | -0.537439 | 0.383205  |
| H | 0.827322  | 1.883585  | -1.025314 |
| H | 3.419513  | -0.680527 | 1.169766  |
| C | 2.604392  | -3.991999 | -1.126948 |
| C | 4.057015  | -4.549442 | 1.199490  |
| C | 3.111649  | -5.293438 | -0.902829 |
| C | 2.852797  | -2.968278 | -0.178284 |
| C | 3.563707  | -3.274104 | 0.983728  |
| C | 3.842798  | -5.544867 | 0.261428  |
| H | 3.723038  | -2.518286 | 1.743414  |
| H | 4.258407  | -6.526398 | 0.451232  |
| H | 4.612605  | -4.770285 | 2.105711  |
| C | 2.201877  | -6.027254 | -3.104965 |
| C | 3.086102  | -8.640164 | -2.631241 |
| C | 2.023189  | -7.027699 | -4.090465 |
| C | 2.871213  | -6.343300 | -1.896398 |
| C | 3.295510  | -7.656361 | -1.680197 |
| C | 2.463008  | -8.327667 | -3.826346 |
| H | 3.786338  | -7.932462 | -0.755499 |
| H | 2.308598  | -9.119976 | -4.547785 |
| H | 3.411560  | -9.657807 | -2.439085 |
| C | 2.724996  | 1.922374  | 0.996440  |
| C | 1.976087  | 3.227496  | 0.694889  |
| H | 2.101769  | 3.540684  | -0.347367 |
| H | 2.367529  | 4.029808  | 1.329064  |
| H | 0.905924  | 3.137390  | 0.902900  |
| C | 2.572377  | 1.618015  | 2.496978  |
| H | 3.153417  | 0.742307  | 2.804097  |
| H | 1.527188  | 1.430139  | 2.749578  |
| H | 2.918127  | 2.470084  | 3.092963  |
| C | 4.215026  | 2.126734  | 0.662168  |
| H | 4.349909  | 2.345034  | -0.402786 |
| H | 4.808020  | 1.237174  | 0.900478  |
| H | 4.620633  | 2.966051  | 1.238987  |
| C | -1.902545 | -2.905866 | 0.360027  |
| C | -3.100517 | -3.445023 | 1.165098  |
| H | -2.872494 | -3.507561 | 2.234528  |
| H | -3.368679 | -4.449950 | 0.818693  |
| H | -3.974719 | -2.795964 | 1.045403  |
| C | -2.275625 | -2.909058 | -1.128589 |
| H | -1.463819 | -2.519221 | -1.749817 |
| H | -3.177565 | -2.319578 | -1.326682 |
| H | -2.475234 | -3.935292 | -1.454335 |
| C | -0.693303 | -3.837913 | 0.551916  |
| H | -0.410985 | -3.941584 | 1.604519  |
| H | 0.176168  | -3.462614 | 0.008679  |
| H | -0.924690 | -4.839235 | 0.171587  |
| C | -2.355572 | 2.755515  | -3.786599 |
| O | -2.897044 | 3.393326  | -4.664407 |

[B]<sup>+</sup> C<sub>93</sub>H<sub>48</sub>O

|   | X         | Y         | Z         |
|---|-----------|-----------|-----------|
| C | -1.624791 | 3.483305  | 1.756577  |
| C | -0.900239 | 3.778398  | 4.476626  |
| C | -1.176661 | 2.367897  | 2.499546  |
| C | -1.772085 | 4.736448  | 2.390103  |
| C | -1.409372 | 4.885797  | 3.752138  |
| C | -0.816135 | 2.511998  | 3.860937  |
| C | -1.879506 | 3.348552  | 0.343966  |
| C | -2.202616 | 3.162732  | -2.403065 |
| C | -2.346597 | 4.465976  | -0.397809 |
| C | -1.644158 | 2.095761  | -0.291078 |
| C | -1.596445 | 2.077410  | -1.708663 |
| C | -2.587370 | 4.310014  | -1.788754 |
| H | -3.028656 | 5.091428  | -2.394005 |
| C | -1.162125 | 1.071661  | 1.889943  |
| C | -1.587607 | -1.502010 | 0.782459  |
| C | -1.501820 | 0.917211  | 0.527014  |
| C | -0.871932 | -0.083655 | 2.651535  |
| C | -1.100026 | -1.332419 | 2.085775  |
| C | -1.753509 | -0.362917 | 0.014433  |
| H | -0.952975 | -2.216813 | 2.693553  |
| H | -2.123409 | -0.447697 | -0.998031 |
| C | -0.348283 | 1.364243  | 4.604900  |
| C | 0.634279  | -0.842614 | 6.014918  |
| C | -0.359505 | 0.075776  | 4.012698  |
| C | 0.141708  | 1.528114  | 5.922264  |
| C | 0.619668  | 0.406978  | 6.608712  |
| C | 0.151513  | -1.007629 | 4.726226  |
| H | 0.988583  | 0.496523  | 7.622308  |
| H | 0.196141  | -1.992064 | 4.275562  |
| H | 1.023635  | -1.695773 | 6.560870  |
| C | -0.446047 | 3.946492  | 5.838538  |
| C | 0.607078  | 4.324515  | 8.400933  |
| C | 0.124990  | 2.855422  | 6.538458  |
| C | -0.533862 | 5.214202  | 6.461247  |
| C | 0.012021  | 5.382978  | 7.735330  |
| C | 0.652229  | 3.071849  | 7.814531  |
| H | -0.001268 | 6.351817  | 8.218329  |
| H | 1.118380  | 2.264622  | 8.364853  |
| H | 1.036641  | 4.477091  | 9.385603  |
| C | -1.574907 | 6.162222  | 4.406130  |
| C | -2.040673 | 8.584799  | 5.724225  |
| C | -1.185504 | 6.320808  | 5.759406  |
| C | -2.155903 | 7.251443  | 3.709201  |
| C | -2.384628 | 8.449136  | 4.390862  |
| C | -1.440743 | 7.534948  | 6.399117  |
| H | -2.847601 | 9.292278  | 3.894424  |
| H | -1.192939 | 7.670493  | 7.444197  |
| H | -2.240985 | 9.516984  | 6.242174  |
| C | -2.286089 | 5.858309  | 1.650436  |
| C | -3.316923 | 8.030755  | 0.202929  |
| C | -2.494907 | 7.102089  | 2.294051  |
| C | -2.590928 | 5.723238  | 0.268086  |
| C | -3.108063 | 6.825896  | -0.433716 |
| C | -3.008367 | 8.166339  | 1.550303  |
| H | -3.349619 | 6.751332  | -1.485793 |
| H | -3.170872 | 9.131509  | 2.012534  |
| H | -3.715844 | 8.875466  | -0.348205 |
| C | -1.082066 | 1.146591  | -2.699467 |
| C | -0.929238 | -0.575221 | -4.931449 |
| C | -1.661843 | 1.485247  | -3.955000 |
| C | -0.158708 | 0.068937  | -2.671749 |
| C | -0.207565 | -0.866838 | -3.743779 |
| C | -1.582600 | 0.681088  | -5.044787 |
| H | -2.065572 | 1.005684  | -5.957456 |
| C | -0.974653 | -1.539683 | -6.003112 |
| C | -1.124166 | -3.436085 | -8.042828 |
| C | -1.642219 | -1.252109 | -7.206185 |
| C | -0.359258 | -2.810451 | -5.833113 |
| C | -0.452821 | -3.773995 | -6.866016 |
| C | -1.708596 | -2.188154 | -8.215537 |
| H | -2.116379 | -0.292258 | -7.362388 |
| H | -2.221991 | -1.954706 | -9.142047 |
| H | -1.203384 | -4.148033 | -8.854122 |
| C | 0.358573  | -3.110876 | -4.622576 |
| C | 1.830000  | -3.675407 | -2.267821 |
| C | 0.949437  | -4.387346 | -4.440768 |
| C | 0.477165  | -2.129691 | -3.613617 |
| C | 1.226906  | -2.406225 | -2.447804 |

|   |           |           |           |
|---|-----------|-----------|-----------|
| C | 1.664484  | -4.675553 | -3.250046 |
| C | 0.145761  | -5.095439 | -6.679860 |
| C | 1.282429  | -7.622093 | -6.304243 |
| C | 0.058024  | -6.076714 | -7.669792 |
| C | 0.822357  | -5.393156 | -5.469572 |
| C | 1.386982  | -6.679438 | -5.279505 |
| C | 0.625324  | -7.324818 | -7.485629 |
| H | -0.453248 | -5.881145 | -8.603465 |
| H | 0.554733  | -8.072561 | -8.268691 |
| H | 1.721956  | -8.605195 | -6.197983 |
| C | 1.440735  | -1.369028 | -1.482295 |
| C | 2.195744  | 0.821283  | 0.152924  |
| C | 2.306396  | -1.570125 | -0.382687 |
| C | 0.837430  | -0.101244 | -1.644362 |
| C | 1.261140  | 0.977125  | -0.855065 |
| C | 2.668324  | -0.476071 | 0.394068  |
| H | 0.868922  | 1.960270  | -1.074392 |
| H | 3.393347  | -0.614809 | 1.186637  |
| C | 2.589210  | -3.944488 | -1.066772 |
| C | 3.954406  | -4.494757 | 1.312845  |
| C | 3.097947  | -5.242888 | -0.827333 |
| C | 2.810130  | -2.916757 | -0.114780 |
| C | 3.475770  | -3.216583 | 1.073067  |
| C | 3.777954  | -5.491155 | 0.369670  |
| H | 3.609250  | -2.458879 | 1.836104  |
| H | 4.174852  | -6.474440 | 0.585673  |
| H | 4.469954  | -4.715180 | 2.241974  |
| C | 2.223536  | -5.992217 | -3.037119 |
| C | 3.227962  | -8.565441 | -2.590684 |
| C | 2.068413  | -6.996077 | -4.023208 |
| C | 2.907836  | -6.289320 | -1.832389 |
| C | 3.400521  | -7.581760 | -1.633503 |
| C | 2.570029  | -8.275332 | -3.773332 |
| H | 3.926923  | -7.840032 | -0.723799 |
| H | 2.447328  | -9.069729 | -4.497915 |
| H | 3.610912  | -9.565416 | -2.415350 |
| C | 2.755237  | 1.997336  | 0.958925  |
| C | 2.017429  | 3.307591  | 0.652788  |
| H | 2.131849  | 3.608982  | -0.394203 |
| H | 2.429574  | 4.112078  | 1.269887  |
| H | 0.949517  | 3.232991  | 0.881225  |
| C | 2.624518  | 1.713152  | 2.465892  |
| H | 3.202717  | 0.837853  | 2.778336  |
| H | 1.582161  | 1.541968  | 2.742469  |
| H | 2.991720  | 2.569499  | 3.041372  |
| C | 4.242415  | 2.173133  | 0.595039  |
| H | 4.363189  | 2.379047  | -0.473786 |
| H | 4.825933  | 1.277637  | 0.833670  |
| H | 4.670721  | 3.011040  | 1.155966  |
| C | -1.966233 | -2.901494 | 0.288973  |
| C | -3.182469 | -3.386089 | 1.102443  |
| H | -2.956253 | -3.441516 | 2.172486  |
| H | -3.483812 | -4.386000 | 0.771152  |
| H | -4.034827 | -2.710864 | 0.972694  |
| C | -2.338769 | -2.905912 | -1.199718 |
| H | -1.513348 | -2.549140 | -1.823846 |
| H | -3.223098 | -2.292480 | -1.404166 |
| H | -2.572030 | -3.927672 | -1.515254 |
| C | -0.790689 | -3.873644 | 0.493936  |
| H | -0.524599 | -3.991900 | 1.548893  |
| H | 0.098983  | -3.532495 | -0.039976 |
| H | -1.055544 | -4.865163 | 0.111752  |
| C | -2.332075 | 2.810209  | -3.843321 |
| O | -2.861380 | 3.450884  | -4.721042 |

[osB]<sup>2+</sup> C<sub>93</sub>H<sub>48</sub>O

|   | X         | Y         | Z         |
|---|-----------|-----------|-----------|
| C | -1.619102 | 3.538054  | 1.769156  |
| C | -0.909971 | 3.849124  | 4.509958  |
| C | -1.138553 | 2.422618  | 2.538303  |
| C | -1.807241 | 4.782529  | 2.393651  |
| C | -1.462214 | 4.951195  | 3.768291  |
| C | -0.785412 | 2.587916  | 3.901030  |
| C | -1.865997 | 3.384501  | 0.360636  |
| C | -2.130930 | 3.163425  | -2.369217 |
| C | -2.324081 | 4.495254  | -0.393783 |
| C | -1.598508 | 2.125828  | -0.267308 |
| C | -1.546697 | 2.087557  | -1.661054 |
| C | -2.537520 | 4.322273  | -1.778282 |
| H | -2.990844 | 5.081935  | -2.402694 |
| C | -1.092397 | 1.129311  | 1.945661  |
| C | -1.538481 | -1.460934 | 0.904154  |
| C | -1.441216 | 0.953847  | 0.585098  |
| C | -0.801441 | -0.017143 | 2.731096  |
| C | -1.035979 | -1.282044 | 2.190000  |
| C | -1.707400 | -0.321554 | 0.110820  |
| H | -0.888995 | -2.155978 | 2.812103  |
| H | -2.080259 | -0.428678 | -0.897996 |
| C | -0.288828 | 1.463771  | 4.651997  |
| C | 0.748514  | -0.709301 | 6.089164  |
| C | -0.284421 | 0.168782  | 4.079079  |
| C | 0.206429  | 1.653443  | 5.963270  |
| C | 0.718890  | 0.545883  | 6.663158  |
| C | 0.249306  | -0.897279 | 4.806713  |
| H | 1.094570  | 0.656794  | 7.671874  |
| H | 0.298843  | -1.887904 | 4.370871  |
| H | 1.156138  | -1.548701 | 6.641673  |
| C | -0.469984 | 4.039201  | 5.860238  |
| C | 0.595259  | 4.472739  | 8.411026  |
| C | 0.152790  | 2.972659  | 6.563774  |
| C | -0.615708 | 5.305021  | 6.484029  |
| C | -0.061237 | 5.505786  | 7.741418  |
| C | 0.687667  | 3.223534  | 7.840571  |
| H | -0.109446 | 6.476575  | 8.219005  |
| H | 1.193524  | 2.442178  | 8.392103  |
| H | 1.029172  | 4.656573  | 9.387974  |
| C | -1.687088 | 6.200953  | 4.415572  |
| C | -2.357366 | 8.562047  | 5.754597  |
| C | -1.334505 | 6.371396  | 5.787135  |
| C | -2.314123 | 7.272278  | 3.710836  |
| C | -2.649295 | 8.435142  | 4.409777  |
| C | -1.695917 | 7.544371  | 6.435427  |
| H | -3.161566 | 9.250642  | 3.916743  |
| H | -1.492624 | 7.680173  | 7.489989  |
| H | -2.643939 | 9.463621  | 6.285312  |
| C | -2.330913 | 5.893813  | 1.646216  |
| C | -3.316115 | 8.065767  | 0.168484  |
| C | -2.584070 | 7.130466  | 2.287180  |
| C | -2.587038 | 5.756825  | 0.260693  |
| C | -3.079109 | 6.862035  | -0.459477 |
| C | -3.069536 | 8.199049  | 1.530418  |
| H | -3.275071 | 6.788058  | -1.521073 |
| H | -3.249119 | 9.163328  | 1.987842  |
| H | -3.689418 | 8.911216  | -0.398578 |
| C | -1.084562 | 1.087093  | -2.674166 |
| C | -0.937390 | -0.587134 | -4.947008 |
| C | -1.688646 | 1.428700  | -3.905636 |
| C | -0.181755 | 0.021328  | -2.667779 |
| C | -0.215193 | -0.893372 | -3.766682 |
| C | -1.608892 | 0.651806  | -5.022888 |
| H | -2.095355 | 1.002730  | -5.924243 |
| C | -0.958956 | -1.525043 | -6.045557 |
| C | -1.054127 | -3.369015 | -8.138765 |
| C | -1.598878 | -1.207854 | -7.258666 |
| C | -0.344882 | -2.792610 | -5.895849 |
| C | -0.413486 | -3.731369 | -6.953542 |
| C | -1.636643 | -2.115065 | -8.293503 |
| H | -2.067205 | -0.243022 | -7.401461 |
| H | -2.124527 | -1.857761 | -9.227218 |
| H | -1.112047 | -4.058162 | -8.971052 |
| C | 0.349911  | -3.116430 | -4.678848 |
| C | 1.803824  | -3.752532 | -2.308449 |
| C | 0.935160  | -4.412825 | -4.514340 |
| C | 0.457782  | -2.161749 | -3.654255 |
| C | 1.208073  | -2.471538 | -2.469877 |

|   |           |           |           |
|---|-----------|-----------|-----------|
| C | 1.639804  | -4.732482 | -3.302782 |
| C | 0.175247  | -5.054760 | -6.781348 |
| C | 1.300758  | -7.601056 | -6.423608 |
| C | 0.112687  | -6.015358 | -7.790847 |
| C | 0.824367  | -5.384606 | -5.551871 |
| C | 1.377532  | -6.689514 | -5.376235 |
| C | 0.674312  | -7.267839 | -7.616628 |
| H | -0.371953 | -5.802074 | -8.733941 |
| H | 0.624545  | -7.996477 | -8.418828 |
| H | 1.736804  | -8.587332 | -6.336353 |
| C | 1.419430  | -1.461404 | -1.489268 |
| C | 2.238666  | 0.699988  | 0.142558  |
| C | 2.306504  | -1.680511 | -0.401438 |
| C | 0.827211  | -0.183392 | -1.637441 |
| C | 1.282773  | 0.872668  | -0.861379 |
| C | 2.695438  | -0.594417 | 0.381038  |
| H | 0.899482  | 1.862596  | -1.063550 |
| H | 3.430642  | -0.743846 | 1.161526  |
| C | 2.554849  | -4.044038 | -1.114555 |
| C | 3.947191  | -4.638147 | 1.247889  |
| C | 3.049187  | -5.350997 | -0.891100 |
| C | 2.797833  | -3.029332 | -0.155819 |
| C | 3.477379  | -3.349738 | 1.019557  |
| C | 3.746000  | -5.620992 | 0.302614  |
| H | 3.634376  | -2.599144 | 1.784775  |
| H | 4.138964  | -6.609147 | 0.500711  |
| H | 4.475527  | -4.868411 | 2.166550  |
| C | 2.174921  | -6.049521 | -3.106416 |
| C | 3.112009  | -8.653954 | -2.665326 |
| C | 2.018194  | -7.039536 | -4.109455 |
| C | 2.841300  | -6.375241 | -1.894279 |
| C | 3.299211  | -7.692262 | -1.700269 |
| C | 2.477806  | -8.328757 | -3.863170 |
| H | 3.801817  | -7.974774 | -0.785150 |
| H | 2.344403  | -9.115060 | -4.594585 |
| H | 3.460624  | -9.667288 | -2.498927 |
| C | 2.819301  | 1.876007  | 0.932235  |
| C | 2.093469  | 3.193789  | 0.627469  |
| H | 2.204222  | 3.493722  | -0.419788 |
| H | 2.519796  | 3.993947  | 1.239932  |
| H | 1.025082  | 3.132639  | 0.860809  |
| C | 2.708847  | 1.605744  | 2.443602  |
| H | 3.262221  | 0.713470  | 2.752437  |
| H | 1.665940  | 1.475549  | 2.742626  |
| H | 3.120019  | 2.452876  | 3.002251  |
| C | 4.303520  | 2.029315  | 0.542295  |
| H | 4.410978  | 2.216369  | -0.531043 |
| H | 4.881890  | 1.133045  | 0.788802  |
| H | 4.747122  | 2.872883  | 1.081553  |
| C | -1.935172 | -2.859104 | 0.422632  |
| C | -3.151030 | -3.320300 | 1.252050  |
| H | -2.913026 | -3.380940 | 2.318898  |
| H | -3.474350 | -4.313566 | 0.923106  |
| H | -3.992892 | -2.630796 | 1.132040  |
| C | -2.321807 | -2.872789 | -1.062963 |
| H | -1.504295 | -2.517300 | -1.699193 |
| H | -3.209244 | -2.263770 | -1.264574 |
| H | -2.557043 | -3.896959 | -1.368004 |
| C | -0.769974 | -3.844435 | 0.625059  |
| H | -0.480851 | -3.943476 | 1.675663  |
| H | 0.112017  | -3.530452 | 0.061197  |
| H | -1.061672 | -4.839481 | 0.273651  |
| C | -2.313731 | 2.777888  | -3.797921 |
| O | -2.848806 | 3.416128  | -4.672346 |



[csB]<sup>2+</sup> C<sub>93</sub>H<sub>48</sub>O

|   | X         | Y         | Z         |
|---|-----------|-----------|-----------|
| C | -1.609181 | 3.481791  | 1.752386  |
| C | -0.922373 | 3.768930  | 4.495070  |
| C | -1.193599 | 2.358209  | 2.505458  |
| C | -1.737947 | 4.740195  | 2.377745  |
| C | -1.393469 | 4.889694  | 3.753965  |
| C | -0.849493 | 2.501423  | 3.884547  |
| C | -1.852402 | 3.343807  | 0.344141  |
| C | -2.251212 | 3.149183  | -2.411338 |
| C | -2.321762 | 4.463501  | -0.400435 |
| C | -1.647938 | 2.083685  | -0.283269 |
| C | -1.619065 | 2.053321  | -1.720370 |
| C | -2.598393 | 4.297148  | -1.800809 |
| H | -3.036908 | 5.083194  | -2.401345 |
| C | -1.184189 | 1.074838  | 1.900334  |
| C | -1.590647 | -1.502423 | 0.775636  |
| C | -1.518098 | 0.917745  | 0.525865  |
| C | -0.884392 | -0.088111 | 2.660183  |
| C | -1.105946 | -1.327912 | 2.090873  |
| C | -1.757483 | -0.371084 | 0.009293  |
| H | -0.962154 | -2.213834 | 2.696887  |
| H | -2.131523 | -0.457912 | -1.001349 |
| C | -0.404481 | 1.352714  | 4.631244  |
| C | 0.583624  | -0.853961 | 6.038734  |
| C | -0.387088 | 0.066934  | 4.027736  |
| C | 0.045389  | 1.507590  | 5.965621  |
| C | 0.533078  | 0.384464  | 6.647303  |
| C | 0.126859  | -1.013310 | 4.736519  |
| H | 0.887913  | 0.467204  | 7.665863  |
| H | 0.195837  | -1.993362 | 4.279521  |
| H | 0.979234  | -1.706209 | 6.580987  |
| C | -0.517249 | 3.927868  | 5.871380  |
| C | 0.350654  | 4.256797  | 8.511895  |
| C | -0.011665 | 2.821159  | 6.596841  |
| C | -0.603451 | 5.196091  | 6.493483  |
| C | -0.154643 | 5.337863  | 7.807975  |
| C | 0.415820  | 3.011576  | 7.915846  |
| H | -0.184434 | 6.298973  | 8.304249  |
| H | 0.807047  | 2.187506  | 8.497608  |
| H | 0.693576  | 4.388337  | 9.532427  |
| C | -1.522204 | 6.171384  | 4.389954  |
| C | -1.836230 | 8.649534  | 5.647783  |
| C | -1.153449 | 6.329623  | 5.752976  |
| C | -2.032393 | 7.283303  | 3.664604  |
| C | -2.178226 | 8.508761  | 4.313343  |
| C | -1.330362 | 7.574760  | 6.358088  |
| H | -2.564091 | 9.376124  | 3.794030  |
| H | -1.083701 | 7.724886  | 7.400637  |
| H | -1.965472 | 9.608114  | 6.138866  |
| C | -2.215084 | 5.860011  | 1.629638  |
| C | -3.226544 | 8.033894  | 0.155553  |
| C | -2.388261 | 7.119715  | 2.256576  |
| C | -2.536174 | 5.714655  | 0.245119  |
| C | -3.045580 | 6.826920  | -0.468974 |
| C | -2.895589 | 8.175677  | 1.504930  |
| H | -3.300017 | 6.747441  | -1.516929 |
| H | -3.048285 | 9.147043  | 1.957242  |
| H | -3.620912 | 8.881141  | -0.394013 |
| C | -1.089722 | 1.165228  | -2.690963 |
| C | -0.966287 | -0.592636 | -4.910308 |
| C | -1.665766 | 1.503752  | -3.968205 |
| C | -0.163524 | 0.065115  | -2.663086 |
| C | -0.236034 | -0.881181 | -3.722186 |
| C | -1.610656 | 0.685865  | -5.035346 |
| H | -2.100288 | 1.000117  | -5.947713 |
| C | -1.031364 | -1.550210 | -5.961714 |
| C | -1.213161 | -3.457856 | -7.986069 |
| C | -1.725477 | -1.267567 | -7.163622 |
| C | -0.409409 | -2.825657 | -5.796180 |
| C | -0.523352 | -3.794387 | -6.824823 |
| C | -1.807274 | -2.205898 | -8.159548 |
| H | -2.204956 | -0.310798 | -7.318089 |
| H | -2.335297 | -1.983292 | -9.079933 |
| H | -1.303625 | -4.170202 | -8.795930 |
| C | 0.331981  | -3.115071 | -4.609480 |
| C | 1.861934  | -3.670544 | -2.280915 |
| C | 0.945863  | -4.391788 | -4.439303 |
| C | 0.459548  | -2.132137 | -3.604752 |
| C | 1.237610  | -2.396648 | -2.452713 |

|   |           |           |           |
|---|-----------|-----------|-----------|
| C | 1.691291  | -4.670876 | -3.258649 |
| C | 0.081353  | -5.112929 | -6.648083 |
| C | 1.247782  | -7.630871 | -6.289015 |
| C | -0.039642 | -6.102780 | -7.622222 |
| C | 0.803495  | -5.396974 | -5.456121 |
| C | 1.390183  | -6.678854 | -5.278178 |
| C | 0.540871  | -7.347253 | -7.444428 |
| H | -0.588882 | -5.924453 | -8.537398 |
| H | 0.440378  | -8.104196 | -8.214931 |
| H | 1.689938  | -8.613257 | -6.192611 |
| C | 1.449982  | -1.366334 | -1.499970 |
| C | 2.183652  | 0.832694  | 0.143929  |
| C | 2.317781  | -1.564551 | -0.391954 |
| C | 0.832674  | -0.093417 | -1.656528 |
| C | 1.249966  | 0.987838  | -0.855407 |
| C | 2.668112  | -0.472806 | 0.380071  |
| H | 0.858927  | 1.971230  | -1.075159 |
| H | 3.396874  | -0.604182 | 1.170247  |
| C | 2.635203  | -3.930896 | -1.093483 |
| C | 4.019583  | -4.476198 | 1.275634  |
| C | 3.173773  | -5.221834 | -0.869246 |
| C | 2.840938  | -2.906135 | -0.131423 |
| C | 3.513386  | -3.202587 | 1.049094  |
| C | 3.861706  | -5.466715 | 0.326746  |
| H | 3.639468  | -2.450796 | 1.819158  |
| H | 4.277363  | -6.443327 | 0.535326  |
| H | 4.543183  | -4.693272 | 2.200694  |
| C | 2.280494  | -5.974608 | -3.064359 |
| C | 3.390103  | -8.514635 | -2.669912 |
| C | 2.126247  | -6.977467 | -4.051157 |
| C | 3.002428  | -6.259739 | -1.879420 |
| C | 3.549881  | -7.536199 | -1.707136 |
| C | 2.684305  | -8.238114 | -3.829445 |
| H | 4.114068  | -7.783164 | -0.817477 |
| H | 2.576522  | -9.029558 | -4.559210 |
| H | 3.819355  | -9.499259 | -2.519498 |
| C | 2.749939  | 2.001814  | 0.951576  |
| C | 2.027870  | 3.318794  | 0.638561  |
| H | 2.151347  | 3.616877  | -0.408285 |
| H | 2.446887  | 4.119888  | 1.254677  |
| H | 0.957923  | 3.256639  | 0.863090  |
| C | 2.605017  | 1.716247  | 2.457759  |
| H | 3.171870  | 0.835547  | 2.775137  |
| H | 1.558417  | 1.557443  | 2.727833  |
| H | 2.979217  | 2.567777  | 3.035018  |
| C | 4.241819  | 2.160361  | 0.596039  |
| H | 4.372270  | 2.366381  | -0.471308 |
| H | 4.817977  | 1.261703  | 0.839735  |
| H | 4.673239  | 2.993979  | 1.159850  |
| C | -1.962670 | -2.905547 | 0.293621  |
| C | -3.159611 | -3.400807 | 1.130223  |
| H | -2.917373 | -3.456246 | 2.196544  |
| H | -3.453809 | -4.403829 | 0.803979  |
| H | -4.022412 | -2.737078 | 1.013577  |
| C | -2.361265 | -2.916721 | -1.187881 |
| H | -1.550434 | -2.553374 | -1.827850 |
| H | -3.256138 | -2.314026 | -1.377515 |
| H | -2.590131 | -3.941206 | -1.496222 |
| C | -0.769919 | -3.861064 | 0.482141  |
| H | -0.479196 | -3.969603 | 1.531442  |
| H | 0.103891  | -3.513984 | -0.074494 |
| H | -1.032171 | -4.858292 | 0.114423  |
| C | -2.364210 | 2.813352  | -3.856580 |
| O | -2.897102 | 3.450639  | -4.730817 |

[2A] C<sub>168</sub>H<sub>64</sub>O<sub>2</sub>

|   | X          | Y          | Z          |
|---|------------|------------|------------|
| O | 0.653032   | 6.018693   | 3.783840   |
| C | 4.747915   | 3.349228   | 2.966787   |
| H | 4.536718   | 4.403688   | 3.158743   |
| C | 1.894745   | 6.242928   | 4.471422   |
| C | 2.430314   | 7.422829   | 5.015087   |
| H | 1.870999   | 8.359324   | 4.907883   |
| C | 3.665714   | 7.399329   | 5.679788   |
| C | 4.366115   | 8.627830   | 6.052188   |
| C | 3.906114   | 9.869330   | 5.638688   |
| H | 2.975368   | 9.927331   | 5.060071   |
| C | 4.580115   | 11.049131  | 5.910888   |
| C | 5.740215   | 10.959531  | 6.669688   |
| H | 6.270234   | 11.883764  | 6.927200   |
| C | 6.282015   | 9.738530   | 7.078788   |
| C | 7.589316   | 9.661730   | 7.746088   |
| C | 8.368016   | 10.800131  | 7.968988   |
| H | 7.963792   | 11.780938  | 7.696118   |
| C | 9.649016   | 10.727631  | 8.499789   |
| C | 10.118817  | 9.486130   | 8.878789   |
| H | 11.119045  | 9.423359   | 9.328468   |
| C | 9.390116   | 8.318130   | 8.700789   |
| C | 8.112316   | 8.390130   | 8.079288   |
| C | 7.406016   | 7.176529   | 7.747488   |
| C | 6.150815   | 7.258529   | 7.095388   |
| C | 5.588715   | 8.541430   | 6.767988   |
| C | 5.480215   | 6.067729   | 6.720788   |
| C | 4.241714   | 6.132229   | 5.974288   |
| C | 3.651514   | 4.927528   | 5.490388   |
| C | 2.613214   | 5.032429   | 4.549887   |
| C | 4.125614   | 3.647528   | 6.006588   |
| C | 5.363415   | 3.594028   | 6.686288   |
| C | 6.058215   | 4.811028   | 7.010788   |
| C | 7.319316   | 4.735128   | 7.660188   |
| C | 7.996816   | 5.918829   | 8.011288   |
| C | 9.293816   | 5.840929   | 8.642589   |
| C | 9.963117   | 7.021729   | 9.038289   |
| C | 11.193617  | 6.911629   | 9.699689   |
| H | 11.688481  | 7.828071   | 10.042647  |
| C | 11.814417  | 5.698929   | 9.916389   |
| C | 11.169117  | 4.558128   | 9.471089   |
| H | 11.656397  | 3.587298   | 9.623607   |
| C | 9.924217   | 4.589728   | 8.844489   |
| C | 9.239616   | 3.363128   | 8.419889   |
| C | 7.922416   | 3.450128   | 7.896688   |
| C | 9.832216   | 2.111927   | 8.539589   |
| H | 10.862376  | 2.047697   | 8.910023   |
| C | 9.169916   | 0.926627   | 8.229789   |
| C | 7.868416   | 1.021727   | 7.769988   |
| H | 7.323557   | 0.102085   | 7.528183   |
| C | 7.228016   | 2.249728   | 7.602488   |
| C | 5.867815   | 2.332228   | 7.073688   |
| C | 5.063015   | 1.197227   | 6.922888   |
| H | 5.450608   | 0.225269   | 7.244659   |
| C | 3.775314   | 1.262327   | 6.395488   |
| C | 3.337714   | 2.489328   | 5.931788   |
| H | 2.327684   | 2.554604   | 5.514635   |
| C | 1.924114   | 4.073328   | 3.632787   |
| C | 0.670168   | 4.647468   | 3.350275   |
| C | -0.334587  | 3.861828   | 2.769387   |
| H | -1.319035  | 4.311271   | 2.584158   |
| C | -0.096387  | 2.522928   | 2.452786   |
| C | -1.172288  | 1.583627   | 2.128086   |
| C | -2.512988  | 1.977827   | 2.270186   |
| H | -2.739560  | 3.012225   | 2.546435   |
| C | -3.560188  | 1.088327   | 2.089786   |
| C | -3.249188  | -0.203773  | 1.696486   |
| H | -4.073097  | -0.906783  | 1.519994   |
| C | -1.940088  | -0.657874  | 1.518686   |
| C | -1.639188  | -2.041574  | 1.141986   |
| C | -2.638288  | -2.993774  | 0.909586   |
| H | -3.685782  | -2.671559  | 0.967581   |
| C | -2.368788  | -4.320275  | 0.629786   |
| C | -1.034087  | -4.692975  | 0.520686   |
| H | -0.799731  | -5.737079  | 0.284384   |
| C | 0.005713   | -3.786075  | 0.695986   |
| C | -0.280587  | -2.450474  | 1.050586   |
| C | 0.784113   | -1.529074  | 1.365786   |
| C | 0.495713   | -0.188673  | 1.713786   |
| C | -0.876987  | 0.258627   | 1.768186   |
| C | 1.540414   | 0.702227   | 2.070386   |
| C | 1.246813   | 2.046627   | 2.488886   |
| C | 2.293214   | 2.881528   | 2.999287   |
| C | 3.681114   | 2.441628   | 2.830187   |
| C | 3.945114   | 1.120527   | 2.457886   |
| C | 2.881214   | 0.216927   | 2.099386   |
| C | 3.162914   | -1.113074  | 1.752086   |
| C | 2.121914   | -1.997474  | 1.382586   |
| C | 2.425814   | -3.350275  | 1.003186   |
| C | 1.407213   | -4.231875  | 0.583386   |
| C | 1.743514   | -5.484675  | 0.085586   |
| H | 0.946048   | -6.141872  | -0.284917  |
| C | 3.054414   | -5.950575  | 0.035086   |
| C | 4.037414   | -5.101775  | 0.545986   |
| H | 5.073213   | -5.462027  | 0.551085   |
| C | 3.769614   | -3.831975  | 1.036486   |
| C | 4.804315   | -2.964374  | 1.576086   |
| C | 4.521315   | -1.613974  | 1.853386   |
| C | 5.566315   | -0.751574  | 2.248286   |
| C | 5.293715   | 0.671127   | 2.435086   |
| C | 6.314115   | 1.607827   | 2.600186   |
| H | 7.354628   | 1.268197   | 2.543399   |
| C | 6.069115   | 2.950928   | 2.834487   |
| C | 6.096015   | -3.452575  | 1.842586   |
| H | 6.304183   | -4.512103  | 1.661176   |
| C | 7.100115   | -2.646874  | 2.342186   |
| C | 6.825115   | -1.299174  | 2.501786   |
| H | 7.626019   | -0.637946  | 2.852052   |
| O | -0.652896  | -6.018722  | -3.783786  |
| C | -4.747989  | -3.349274  | -2.966615  |
| H | -4.536768  | -4.403759  | -3.158524  |
| C | -1.894565  | -6.243034  | -4.471212  |
| C | -2.430388  | -7.422776  | -5.014916  |
| H | -1.871574  | -8.359429  | -4.907969  |
| C | -3.665788  | -7.399376  | -5.679616  |
| C | -4.366289  | -8.627876  | -6.052017  |
| C | -3.906189  | -9.869277  | -5.638517  |
| H | -2.975376  | -9.927725  | -5.059884  |
| C | -4.580189  | -11.049077 | -5.910717  |
| C | -5.740289  | -10.959577 | -6.669517  |
| H | -6.269955  | -11.884019 | -6.927149  |
| C | -6.282089  | -9.738577  | -7.078617  |
| C | -7.589490  | -9.661777  | -7.745917  |
| C | -8.368090  | -10.800177 | -7.968817  |
| H | -7.963811  | -11.781036 | -7.695928  |
| C | -9.649191  | -10.727677 | -8.499618  |
| C | -10.118991 | -9.486177  | -8.878618  |
| H | -11.119149 | -9.423409  | -9.328315  |
| C | -9.390290  | -8.318076  | -8.700618  |
| C | -8.112390  | -8.390176  | -8.079117  |
| C | -7.406190  | -7.176576  | -7.747317  |
| C | -6.150989  | -7.258576  | -7.095217  |
| C | -5.588789  | -8.541476  | -6.767817  |
| C | -5.480289  | -6.067775  | -6.720617  |
| C | -4.241789  | -6.132276  | -5.974117  |
| C | -3.651588  | -4.927575  | -5.490216  |
| C | -2.613288  | -5.032475  | -4.549716  |
| C | -4.125689  | -3.647575  | -6.006417  |
| C | -5.363489  | -3.593975  | -6.686117  |
| C | -6.058289  | -4.811075  | -7.010617  |
| C | -7.319490  | -4.735175  | -7.660017  |
| C | -7.996990  | -5.918875  | -8.011117  |
| C | -9.293890  | -5.840975  | -8.642418  |
| C | -9.963191  | -7.021776  | -9.038118  |
| C | -11.193691 | -6.911676  | -9.699518  |
| H | -11.688423 | -7.828130  | -10.042532 |
| C | -11.814591 | -5.698975  | -9.916218  |
| C | -11.169291 | -4.558175  | -9.470918  |
| H | -11.656637 | -3.587361  | -9.623579  |
| C | -9.924391  | -4.589675  | -8.844318  |
| C | -9.239690  | -3.363175  | -8.419717  |
| C | -7.922590  | -3.450175  | -7.896517  |
| C | -9.832391  | -2.111974  | -8.539418  |
| H | -10.862442 | -2.047945  | -8.909742  |
| C | -9.170090  | -0.926674  | -8.229617  |
| C | -7.868590  | -1.021774  | -7.769817  |
| H | -7.323535  | -0.102247  | -7.527975  |
| C | -7.228090  | -2.249774  | -7.602317  |
| C | -5.867989  | -2.332274  | -7.073517  |

|   |            |            |            |
|---|------------|------------|------------|
| C | -5.063189  | -1.197274  | -6.922717  |
| H | -5.450536  | -0.225232  | -7.244389  |
| C | -3.775388  | -1.262374  | -6.395317  |
| C | -3.337888  | -2.489374  | -5.931617  |
| H | -2.327872  | -2.554480  | -5.514537  |
| C | -1.924188  | -4.073375  | -3.632616  |
| C | -0.670259  | -4.647479  | -3.350180  |
| C | 0.334513   | -3.861875  | -2.769215  |
| H | 1.318955   | -4.311267  | -2.583941  |
| C | 0.096213   | -2.522974  | -2.452615  |
| C | 1.172213   | -1.583674  | -2.127915  |
| C | 2.512914   | -1.977774  | -2.270015  |
| H | 2.739270   | -3.012197  | -2.546141  |
| C | 3.560114   | -1.088374  | -2.089615  |
| C | 3.249114   | 0.203827   | -1.696315  |
| H | 4.072967   | 0.906795   | -1.519692  |
| C | 1.939914   | 0.657827   | -1.518515  |
| C | 1.639114   | 2.041527   | -1.141815  |
| C | 2.638214   | 2.993728   | -0.909415  |
| H | 3.685545   | 2.671490   | -0.967445  |
| C | 2.368614   | 4.320228   | -0.629615  |
| C | 1.034013   | 4.692928   | -0.520515  |
| H | 0.799829   | 5.737275   | -0.284308  |
| C | -0.005887  | 3.786028   | -0.695815  |
| C | 0.280413   | 2.450428   | -1.050415  |
| C | -0.784187  | 1.529027   | -1.365615  |
| C | -0.495787  | 0.188627   | -1.713615  |
| C | 0.876813   | -0.258673  | -1.768015  |
| C | -1.540588  | -0.702274  | -2.070215  |
| C | -1.246887  | -2.046674  | -2.488715  |
| C | -2.293288  | -2.881574  | -2.999116  |
| C | -3.681188  | -2.441574  | -2.830015  |
| C | -3.945289  | -1.120574  | -2.457715  |
| C | -2.881388  | -0.216973  | -2.099215  |
| C | -3.163088  | 1.113027   | -1.751915  |
| C | -2.121988  | 1.997527   | -1.382415  |
| C | -2.425988  | 3.350228   | -1.003015  |
| C | -1.407388  | 4.231828   | -0.583215  |
| C | -1.743688  | 5.484629   | -0.085414  |
| H | -0.945965  | 6.141513   | 0.285108   |
| C | -3.054488  | 5.950529   | -0.034914  |
| C | -4.037589  | 5.101729   | -0.545815  |
| H | -5.073308  | 5.461766   | -0.550556  |
| C | -3.769688  | 3.832028   | -1.036315  |
| C | -4.804389  | 2.964328   | -1.575915  |
| C | -4.521489  | 1.613927   | -1.853215  |
| C | -5.566389  | 0.751527   | -2.248115  |
| C | -5.293789  | -0.671174  | -2.434915  |
| C | -6.314189  | -1.607874  | -2.600015  |
| H | -7.354889  | -1.268313  | -2.543072  |
| C | -6.069189  | -2.950974  | -2.834315  |
| C | -6.096189  | 3.452528   | -1.842415  |
| H | -6.304171  | 4.511947   | -1.661050  |
| C | -7.100190  | 2.646828   | -2.342015  |
| C | -6.825190  | 1.299127   | -2.501615  |
| H | -7.626036  | 0.637740   | -2.851886  |
| H | 4.205254   | 12.009358  | 5.563675   |
| H | 10.252625  | 11.624381  | 8.628606   |
| H | 12.777562  | 5.638817   | 10.420591  |
| H | 9.662713   | -0.036125  | 8.343898   |
| H | 8.082540   | -3.051022  | 2.579640   |
| H | 6.884765   | 3.665588   | 2.930292   |
| H | 3.169034   | 5.042674   | -0.486203  |
| H | 3.147375   | 0.375508   | 6.334372   |
| H | -3.169160  | -5.042845  | 0.487409   |
| H | -6.884776  | -3.665448  | -2.930197  |
| H | -4.205287  | -12.009318 | -5.563583  |
| H | -10.252527 | -11.624442 | -8.628654  |
| H | -12.777917 | -5.639008  | -10.420047 |
| H | -3.147228  | -0.375575  | -6.334104  |
| H | -8.082702  | 3.050896   | -2.579071  |
| H | -3.297857  | 6.927641   | 0.371077   |
| H | 4.593917   | -1.399305  | -2.229934  |
| H | 3.297921   | -6.927704  | -0.371474  |
| H | -4.593674  | 1.399628   | 2.228343   |
| H | -9.662684  | 0.035932   | -8.343504  |

[2B] C<sub>170</sub>H<sub>64</sub>O<sub>2</sub>

|   | X         | Y         | Z         |
|---|-----------|-----------|-----------|
| O | -0.253129 | 6.852945  | 3.590201  |
| C | 0.636471  | 6.037545  | 3.767801  |
| C | 4.747973  | 3.349244  | 2.966701  |
| H | 4.536776  | 4.403704  | 3.158657  |
| C | 1.935172  | 6.266745  | 4.466102  |
| C | 2.430372  | 7.422845  | 5.015002  |
| H | 1.871057  | 8.359340  | 4.907798  |
| C | 3.665772  | 7.399345  | 5.679702  |
| C | 4.366172  | 8.627846  | 6.052102  |
| C | 3.906172  | 9.869346  | 5.638602  |
| H | 2.975426  | 9.927347  | 5059986   |
| C | 4.580173  | 11.049146 | 5.910802  |
| C | 5.740273  | 10.959546 | 6.669602  |
| H | 6.270292  | 11.883780 | 6.927114  |
| C | 6.282073  | 9.738546  | 7.078702  |
| C | 7.589373  | 9.661746  | 7.746002  |
| C | 8.368074  | 10.800146 | 7.968903  |
| H | 7.963850  | 11.780954 | 7.696033  |
| C | 9.649074  | 10.727646 | 8.499703  |
| C | 10.118874 | 9.486146  | 8.878703  |
| H | 11.119102 | 9.423374  | 9.328382  |
| C | 9.390174  | 8.318146  | 8.700703  |
| C | 8.112374  | 8.390146  | 8.079203  |
| C | 7.406073  | 7.176545  | 7.747402  |
| C | 6.150873  | 7.258545  | 7.095302  |
| C | 5.588773  | 8.541446  | 6.767902  |
| C | 5.480273  | 6.067745  | 6.720702  |
| C | 4.241772  | 6.132245  | 5.974202  |
| C | 3.651572  | 4.927545  | 5.490302  |
| C | 2.613272  | 5.032445  | 4.549802  |
| C | 4.125672  | 3.647544  | 6.006502  |
| C | 5.363473  | 3.594044  | 6.686202  |
| C | 6.058273  | 4.811045  | 7.010702  |
| C | 7.319373  | 4.735145  | 7.660102  |
| C | 7.996874  | 5.918845  | 8.011203  |
| C | 9.293874  | 5.840945  | 8.642503  |
| C | 9.963174  | 7.021745  | 9.038203  |
| C | 11.193674 | 6.911645  | 9.699603  |
| H | 11.688539 | 7.828087  | 10.042561 |
| C | 11.814475 | 5.698945  | 9.916303  |
| C | 11.169174 | 4.558145  | 9.471003  |
| H | 11.656455 | 3.587315  | 9.623521  |
| C | 9.924274  | 4.589745  | 8.844403  |
| C | 9.239674  | 3.363144  | 8.419803  |
| C | 7.922473  | 3.450144  | 7.896603  |
| C | 9.832274  | 2.111944  | 8.539503  |
| H | 10.862434 | 2.047714  | 8.909937  |
| C | 9.169974  | 0.926644  | 8.229703  |
| C | 7.868473  | 1.021744  | 7.769902  |
| H | 7.323615  | 0.102101  | 7.528097  |
| C | 7.228073  | 2.249744  | 7.602402  |
| C | 5.867873  | 2.332244  | 7.073602  |
| C | 5.063073  | 1.197244  | 6.922802  |
| H | 5.450666  | 0.225285  | 7.244573  |
| C | 3.775372  | 1.262344  | 6.395402  |
| C | 3.337772  | 2.489344  | 5.931702  |
| H | 2.327742  | 2.554621  | 5.514549  |
| C | 1.924172  | 4.073344  | 6.332701  |
| C | 0.657671  | 4.609845  | 3.351901  |
| C | -0.334529 | 3.861844  | 2.769301  |
| H | -1.318977 | 4.311287  | 2.584073  |
| C | -0.096329 | 2.522944  | 2.452701  |
| C | -1.172229 | 1.583644  | 2.128001  |
| C | -2.512930 | 1.977844  | 2.270101  |
| H | -2.739502 | 3.012241  | 2.546349  |
| C | -3.560130 | 1.088344  | 2.089701  |
| C | -3.249130 | -0.203757 | 1.696401  |
| H | -4.073038 | -0.906766 | 1.519909  |
| C | -1.940029 | -0.657857 | 1.518601  |
| C | -1.639129 | -2.041557 | 1.141901  |
| C | -2.638230 | -2.993758 | 0.909501  |
| H | -3.685724 | -2.671542 | 0.967496  |
| C | -2.368729 | -4.320258 | 0.629700  |
| C | -1.034029 | -4.692958 | 0.520600  |
| H | -0.799673 | -5.737062 | 0.284299  |
| C | 0.005771  | -3.786058 | 0.695900  |
| C | -0.280529 | -2.450457 | 1.050501  |
| C | 0.784171  | -1.529057 | 1.365701  |

|   |            |            |            |
|---|------------|------------|------------|
| C | 0.495771   | -0.188657  | 1.713701   |
| C | -0.876929  | 0.258643   | 1.768101   |
| C | 1.540472   | 0.702243   | 2.070301   |
| C | 1.246872   | 2.046644   | 2.488801   |
| C | 2.293272   | 2.881544   | 2.999201   |
| C | 3.681172   | 2.441644   | 2.830101   |
| C | 3.945172   | 1.120544   | 2.457801   |
| C | 2.881272   | 0.216943   | 2.099301   |
| C | 3.162972   | -1.113057  | 1.752001   |
| C | 2.121972   | -1.997457  | 1.382501   |
| C | 2.425872   | -3.350258  | 1.003101   |
| C | 1.407272   | -4.231858  | 0.583300   |
| C | 1.743572   | -5.484658  | 0.085500   |
| H | 0.946106   | -6.141855  | -0.285002  |
| C | 3.054472   | -5.950558  | 0.035000   |
| C | 4.037472   | -5.101758  | 0.545900   |
| H | 5.073271   | -5.462010  | 0.551000   |
| C | 3.769672   | -3.831958  | 1.036401   |
| C | 4.804373   | -2.964358  | 1.576001   |
| C | 4.521373   | -1.613957  | 1.853301   |
| C | 5.566373   | -0.751557  | 2.248201   |
| C | 5.293773   | 0.671143   | 2.435001   |
| C | 6.314173   | 1.607844   | 2.600101   |
| H | 7.354686   | 1.268214   | 2.543313   |
| C | 6.069173   | 2.950944   | 2.834401   |
| C | 6.096073   | -3.452558  | 1.842501   |
| H | 6.304240   | -4.512086  | 1.661091   |
| C | 7.100173   | -2.646857  | 2.342101   |
| C | 6.825173   | -1.299157  | 2.501701   |
| H | 7.626077   | -0.637929  | 2.851967   |
| O | 0.253171   | -6.852859  | -3.590201  |
| C | -0.636429  | -6.037458  | -3.767801  |
| C | -4.747930  | -3.349258  | -2.966701  |
| H | -4.536710  | -4.403742  | -3.158609  |
| C | -1.935229  | -6.266759  | -4.466101  |
| C | -2.430330  | -7.422759  | -5.015001  |
| H | -1.871515  | -8.359412  | -4.908054  |
| C | -3.665730  | -7.399359  | -5.679701  |
| C | -4.366230  | -8.627859  | -6.052102  |
| C | -3.906130  | -9.869260  | -5.638601  |
| H | -2.975317  | -9.927708  | -5.059969  |
| C | -4.580130  | -11.049060 | -5.910801  |
| C | -5.740230  | -10.959560 | -6.669602  |
| H | -6.269896  | -11.884001 | -6.927233  |
| C | -6.282031  | -9.738560  | -7.078702  |
| C | -7.589431  | -9.661760  | -7.746002  |
| C | -8.368031  | -10.800160 | -7.968902  |
| H | -7.963752  | -11.781019 | -7.696013  |
| C | -9.649132  | -10.727660 | -8.499702  |
| C | -10.118932 | -9.486159  | -8.878702  |
| H | -11.119090 | -9.423392  | -9.328400  |
| C | -9.390232  | -8.318059  | -8.700702  |
| C | -8.112331  | -8.390159  | -8.079202  |
| C | -7.406131  | -7.176559  | -7.747402  |
| C | -6.150931  | -7.258559  | -7.095302  |
| C | -5.588730  | -8.541459  | -6.767902  |
| C | -5.480230  | -6.067758  | -6.720702  |
| C | -4.241730  | -6.132259  | -5.974201  |
| C | -3.651530  | -4.927558  | -5.490301  |
| C | -2.613230  | -5.032458  | -4.549801  |
| C | -4.125630  | -3.647558  | -6.006501  |
| C | -5.363430  | -3.593958  | -6.686202  |
| C | -6.058231  | -4.811058  | -7.010702  |
| C | -7.319431  | -4.735158  | -7.660102  |
| C | -7.996931  | -5.918858  | -8.011202  |
| C | -9.293831  | -5.840958  | -8.642502  |
| C | -9.963132  | -7.021759  | -9.038202  |
| C | -11.193632 | -6.911659  | -9.699603  |
| H | -11.688364 | -7.828113  | -10.042617 |
| C | -11.814532 | -5.698958  | -9.916303  |
| C | -11.169232 | -4.558158  | -9.471002  |
| H | -11.656578 | -3.587345  | -9.623664  |
| C | -9.924332  | -4.589658  | -8.844402  |
| C | -9.239631  | -3.363158  | -8.419802  |
| C | -7.922531  | -3.450158  | -7.896602  |
| C | -9.832332  | -2.111957  | -8.539502  |
| H | -10.862383 | -2.047928  | -8.909826  |
| C | -9.170031  | -0.926657  | -8.229702  |
| C | -7.868531  | -1.021757  | -7.769902  |
| H | -7.323476  | -0.102230  | -7.528060  |

|   |            |            |            |
|---|------------|------------|------------|
| C | -7.228031  | -2.249757  | -7.602402  |
| C | -5.867930  | -2.332257  | -7.073602  |
| C | -5.063130  | -1.197257  | -6.922802  |
| H | -5.450478  | -0.225215  | -7.244474  |
| C | -3.775330  | -1.262357  | -6.395402  |
| C | -3.337830  | -2.489357  | -5.931701  |
| H | -2.327813  | -2.554464  | -5.514622  |
| C | -1.924129  | -4.073358  | -3.632701  |
| C | -0.657629  | -4.609858  | -3.351901  |
| C | 0.334571   | -3.861858  | -2.769301  |
| H | 1.319014   | -4.311250  | -2.584027  |
| C | 0.096271   | -2.522957  | -2.452700  |
| C | 1.172272   | -1.583657  | -2.128000  |
| C | 2.512972   | -1.977757  | -2.270100  |
| H | 2.739328   | -3.012180  | -2.546226  |
| C | 3.560172   | -1.088357  | -2.089700  |
| C | 3.249172   | 0.203843   | -1.696400  |
| H | 4.073025   | 0.906812   | -1.519778  |
| C | 1.939972   | 0.657844   | -1.518600  |
| C | 1.639172   | 2.041544   | -1.141900  |
| C | 2.638272   | 2.993744   | -0.909500  |
| H | 3.685603   | 2.671506   | -0.967530  |
| C | 2.368672   | 4.320245   | -0.629700  |
| C | 1.034072   | 4.692945   | -0.520600  |
| H | 0.799887   | 5.737291   | -0.284394  |
| C | -0.005829  | 3.786044   | -0.695900  |
| C | 0.280471   | 2.450444   | -1.050500  |
| C | -0.784129  | 1.529044   | -1.365700  |
| C | -0.495729  | 0.188643   | -1.713700  |
| C | 0.876871   | -0.258657  | -1.768100  |
| C | -1.540529  | -0.702257  | -2.070300  |
| C | -1.246829  | -2.046657  | -2.488800  |
| C | -2.293229  | -2.881558  | -2.999201  |
| C | -3.681130  | -2.441557  | -2.830101  |
| C | -3.945230  | -1.120557  | -2.457800  |
| C | -2.881330  | -0.216957  | -2.099300  |
| C | -3.163030  | 1.113044   | -1.752000  |
| C | -2.121929  | 1.997544   | -1.382500  |
| C | -2.425930  | 3.350244   | -1.003100  |
| C | -1.407329  | 4.231845   | -0.583300  |
| C | -1.743629  | 5.484645   | -0.085500  |
| H | -0.945907  | 6.141529   | 0.285023   |
| C | -3.054430  | 5.950545   | -0.035000  |
| C | -4.037530  | 5.101745   | -0.545900  |
| H | -5.073249  | 5.461782   | -0.550642  |
| C | -3.769630  | 3.832044   | -1.036400  |
| C | -4.804330  | 2.964344   | -1.576000  |
| C | -4.521430  | 1.613944   | -1.853300  |
| C | -5.566330  | 0.751544   | -2.248200  |
| C | -5.293730  | -0.671157  | -2.435000  |
| C | -6.314131  | -1.607857  | -2.600100  |
| H | -7.354830  | -1.268296  | -2.543157  |
| C | -6.069131  | -2.950958  | -2.834401  |
| C | -6.096131  | 3.452544   | -1.842500  |
| H | -6.304112  | 4.511964   | -1.661135  |
| C | -7.100131  | 2.646844   | -2.342100  |
| C | -6.825131  | 1.299144   | -2.501700  |
| H | -7.625977  | 0.637757   | -2.851971  |
| H | 4.205312   | 12.009373  | 5.563589   |
| H | 10.252682  | 11.624397  | 8.628520   |
| H | 12.777619  | 5.638833   | 10.420504  |
| H | 9.662771   | -0.036109  | 8.343812   |
| H | 8.082598   | -3.051005  | 2.579554   |
| H | 6.884823   | 3.665604   | 2.930207   |
| H | 3.169092   | 5.042690   | -0.486288  |
| H | 3.147433   | 0.375524   | 6.334286   |
| H | -3.169102  | -5.042829  | 0.487323   |
| H | -6.884717  | -3.665431  | -2.930282  |
| H | -4.205228  | -12.009301 | -5.563668  |
| H | -10.252468 | -11.624425 | -8.628739  |
| H | -12.777857 | -5.638991  | -10.420132 |
| H | -3.147169  | -0.375558  | -6.334189  |
| H | -8.082643  | 3.050912   | -2.579156  |
| H | -3.297798  | 6.927657   | 0.370992   |
| H | 4.593975   | -1.399289  | -2.230019  |
| H | 3.297979   | -6.927687  | -0.371559  |
| H | -4.593615  | 1.399645   | 2.228257   |
| H | -9.662625  | 0.035949   | -8.343589  |

[AB] C<sub>169</sub>H<sub>64</sub>O<sub>2</sub>

|   | X          | Y          | Z          |
|---|------------|------------|------------|
| O | -0.252060  | 6.823790   | 3.574925   |
| C | 0.637540   | 6.008390   | 3.752525   |
| C | 4.749042   | 3.320089   | 2.951425   |
| H | 4.537845   | 4.374549   | 3.143380   |
| C | 1.936241   | 6.237590   | 4.450825   |
| C | 2.431441   | 7.393690   | 4.999725   |
| H | 1.872126   | 8.330185   | 4.892521   |
| C | 3.666841   | 7.370190   | 5.664425   |
| C | 4.367242   | 8.598691   | 6.036825   |
| C | 3.907241   | 9.840191   | 5.623325   |
| H | 2.976495   | 9.898192   | 5.044709   |
| C | 4.581242   | 11.019991  | 5.895525   |
| C | 5.741342   | 10.930391  | 6.654326   |
| H | 6.271361   | 11.854625  | 6.911837   |
| C | 6.283142   | 9.709391   | 7.063426   |
| C | 7.590442   | 9.632591   | 7.730726   |
| C | 8.369143   | 10.770991  | 7.953626   |
| H | 7.964919   | 11.751799  | 7.680756   |
| C | 9.650143   | 10.698491  | 8.484426   |
| C | 10.119943  | 9.456991   | 8.863426   |
| H | 11.120171  | 9.394219   | 9.313105   |
| C | 9.391243   | 8.288991   | 8.685426   |
| C | 8.113443   | 8.360991   | 8.063926   |
| C | 7.407142   | 7.147390   | 7.732126   |
| C | 6.151942   | 7.229390   | 7.080026   |
| C | 5.589842   | 8.512291   | 6.752626   |
| C | 5.481342   | 6.038590   | 6.705426   |
| C | 4.242841   | 6.103090   | 5.958925   |
| C | 3.652641   | 4.898390   | 5.475025   |
| C | 2.614341   | 5.003290   | 4.534525   |
| C | 4.126741   | 3.618389   | 5.991225   |
| C | 5.364542   | 3.564889   | 6.670926   |
| C | 6.059342   | 4.781890   | 6.995426   |
| C | 7.320442   | 4.705990   | 7.644826   |
| C | 7.997943   | 5.889690   | 7.995926   |
| C | 9.294943   | 5.811790   | 8.627226   |
| C | 9.964243   | 6.992590   | 9.022926   |
| C | 11.194744  | 6.882490   | 9.684326   |
| H | 11.689608  | 7.798932   | 10.027284  |
| C | 11.815544  | 5.669790   | 9.901027   |
| C | 11.170244  | 4.528990   | 9.455726   |
| H | 11.657524  | 3.558160   | 9.608244   |
| C | 9.925343   | 4.560590   | 8.829126   |
| C | 9.240743   | 3.333989   | 8.404526   |
| C | 7.923543   | 3.420989   | 7.881326   |
| C | 9.833343   | 2.082789   | 8.524226   |
| H | 10.863503  | 2.018559   | 8.894661   |
| C | 9.171043   | 0.897489   | 8.214426   |
| C | 7.869543   | 0.992589   | 7.754626   |
| H | 7.324684   | 0.072946   | 7.512821   |
| C | 7.229142   | 2.220589   | 7.587126   |
| C | 5.868942   | 2.303089   | 7.058326   |
| C | 5.064142   | 1.168089   | 6.907526   |
| H | 5.451735   | 0.196130   | 7.229297   |
| C | 3.776441   | 1.233189   | 6.380126   |
| C | 3.338841   | 2.460189   | 5.916425   |
| H | 2.328811   | 2.525466   | 5.499273   |
| C | 1.925241   | 4.044189   | 3.617425   |
| C | 0.658741   | 4.580690   | 3.336625   |
| C | -0.333460  | 3.832689   | 2.754025   |
| H | -1.317908  | 4.282132   | 2.568796   |
| C | -0.095260  | 2.493789   | 2.437424   |
| C | -1.171160  | 1.554489   | 2.112724   |
| C | -2.511860  | 1.948689   | 2.254824   |
| H | -2.738433  | 2.983086   | 2.531073   |
| C | -3.559061  | 1.059189   | 2.074424   |
| C | -3.248061  | -0.232912  | 1.681124   |
| H | -4.071969  | -0.935921  | 1.504632   |
| C | -1.938960  | -0.687012  | 1.503324   |
| C | -1.638060  | -2.070712  | 1.126624   |
| C | -2.637160  | -3.022913  | 0.894224   |
| H | -3.684655  | -2.700697  | 0.952219   |
| C | -2.367660  | -4.349413  | 0.614424   |
| C | -1.032960  | -4.722113  | 0.505324   |
| H | -0.798604  | -5.766217  | 0.269022   |
| C | 0.006840   | -3.815213  | 0.680624   |
| C | -0.279460  | -2.479612  | 1.035224   |
| C | 0.785241   | -1.558212  | 1.350424   |
| C | 0.496840   | -0.217812  | 1.698424   |
| C | -0.875860  | 0.229488   | 1.752824   |
| C | 1.541541   | 0.673089   | 2.055024   |
| C | 1.247941   | 2.017489   | 2.473524   |
| C | 2.294341   | 2.852389   | 2.983925   |
| C | 3.682241   | 2.412489   | 2.814825   |
| C | 3.946241   | 1.091389   | 2.442524   |
| C | 2.882341   | 0.187788   | 2.084024   |
| C | 3.164041   | -1.142212  | 1.736724   |
| C | 2.123041   | -2.026612  | 1.367224   |
| C | 2.426941   | -3.379413  | 0.987824   |
| C | 1.408341   | -4.261013  | 0.568024   |
| C | 1.744641   | -5.513813  | 0.070224   |
| H | 0.947175   | -6.171010  | -0.300279  |
| C | 3.055541   | -5.979713  | 0.019724   |
| C | 4.038541   | -5.130913  | 0.530624   |
| H | 5.074340   | -5.491165  | 0.535723   |
| C | 3.770741   | -3.861113  | 1.021124   |
| C | 4.805442   | -2.993513  | 1.560724   |
| C | 4.522442   | -1.643112  | 1.838024   |
| C | 5.567442   | -0.780712  | 2.232924   |
| C | 5.294842   | 0.641989   | 2.419724   |
| C | 6.315242   | 1.578689   | 2.584824   |
| H | 7.355755   | 1.239059   | 2.528037   |
| C | 6.070242   | 2.921789   | 2.819125   |
| C | 6.097142   | -3.481713  | 1.827224   |
| H | 6.305310   | -4.541241  | 1.645814   |
| C | 7.101242   | -2.676012  | 2.326824   |
| C | 6.826242   | -1.328312  | 2.486424   |
| H | 7.627146   | -0.667084  | 2.836690   |
| O | -0.651816  | -6.047662  | -3.799087  |
| C | -4.746861  | -3.378413  | -2.981977  |
| H | -4.535641  | -4.432897  | -3.173886  |
| C | -1.893562  | -6.272047  | -4.486614  |
| C | -2.429260  | -7.451914  | -5.030278  |
| H | -1.870446  | -8.388567  | -4.923331  |
| C | -3.664661  | -7.428514  | -5.694978  |
| C | -4.365161  | -8.657014  | -6.067378  |
| C | -3.905061  | -9.898415  | -5.653878  |
| H | -2.974248  | -9.956863  | -5.075245  |
| C | -4.579061  | -11.078215 | -5.926078  |
| C | -5.739161  | -10.988715 | -6.684878  |
| H | -6.268827  | -11.913156 | -6.942510  |
| C | -6.280961  | -9.767715  | -7.093978  |
| C | -7.588362  | -9.690914  | -7.761279  |
| C | -8.366962  | -10.829315 | -7.984179  |
| H | -7.962683  | -11.810174 | -7.711290  |
| C | -9.648063  | -10.756815 | -8.514979  |
| C | -10.117863 | -9.515314  | -8.893979  |
| H | -11.118021 | -9.452547  | -9.343676  |
| C | -9.389162  | -8.347214  | -8.715979  |
| C | -8.111262  | -8.419314  | -8.094479  |
| C | -7.405062  | -7.205714  | -7.762679  |
| C | -6.149862  | -7.287714  | -7.110578  |
| C | -5.587661  | -8.570614  | -6.783178  |
| C | -5.479161  | -6.096913  | -6.735978  |
| C | -4.240661  | -6.161414  | -5.989478  |
| C | -3.650461  | -4.956713  | -5.505578  |
| C | -2.612160  | -5.061613  | -4.565078  |
| C | -4.124561  | -3.676713  | -6.021778  |
| C | -5.362361  | -3.623113  | -6.701478  |
| C | -6.057161  | -4.840213  | -7.025978  |
| C | -7.318362  | -4.764313  | -7.675379  |
| C | -7.995862  | -5.948013  | -8.026479  |
| C | -9.292762  | -5.870113  | -8.657779  |
| C | -9.962063  | -7.050914  | -9.053479  |
| C | -11.192563 | -6.940814  | -9.714879  |
| H | -11.687295 | -7.857268  | -10.057879 |
| C | -11.813463 | -5.728113  | -9.931579  |
| C | -11.168163 | -4.587313  | -9.486279  |
| H | -11.655509 | -3.616499  | -9.638941  |
| C | -9.923263  | -4.618813  | -8.859679  |
| C | -9.238562  | -3.392313  | -8.435079  |
| C | -7.921462  | -3.479313  | -7.911879  |
| C | -9.831263  | -2.141112  | -8.554779  |
| H | -10.861314 | -2.077083  | -8.925103  |
| C | -9.168962  | -0.955812  | -8.244979  |
| C | -7.867462  | -1.050912  | -7.785179  |
| H | -7.322407  | -0.131385  | -7.543337  |
| C | -7.226962  | -2.278912  | -7.617679  |

|   |            |            |            |
|---|------------|------------|------------|
| C | -5.866861  | -2.361412  | -7.088878  |
| C | -5.062061  | -1.226412  | -6.938078  |
| H | -5.449409  | -0.254370  | -7.259750  |
| C | -3.774261  | -1.291512  | -6.410678  |
| C | -3.336761  | -2.518512  | -5.946978  |
| H | -2.326744  | -2.583619  | -5.529899  |
| C | -1.923060  | -4.102513  | -3.647977  |
| C | -0.668964  | -4.676427  | -3.365685  |
| C | 0.335640   | -3.891013  | -2.784577  |
| H | 1.320083   | -4.340405  | -2.599303  |
| C | 0.097340   | -2.552112  | -2.467977  |
| C | 1.173341   | -1.612812  | -2.143277  |
| C | 2.514041   | -2.006912  | -2.285377  |
| H | 2.740398   | -3.041335  | -2.561502  |
| C | 3.561241   | -1.117512  | -2.104977  |
| C | 3.250241   | 0.174688   | -1.711677  |
| H | 4.074094   | 0.877657   | -1.535054  |
| C | 1.941041   | 0.628689   | -1.533877  |
| C | 1.640241   | 2.012389   | -1.157177  |
| C | 2.639341   | 2.964589   | -0.924777  |
| H | 3.686672   | 2.642351   | -0.982807  |
| C | 2.369741   | 4.291090   | -0.644977  |
| C | 1.035141   | 4.663790   | -0.535876  |
| H | 0.800956   | 5.708136   | -0.299670  |
| C | -0.004760  | 3.756889   | -0.711176  |
| C | 0.281540   | 2.421289   | -1.065777  |
| C | -0.783060  | 1.499889   | -1.380977  |
| C | -0.494660  | 0.159488   | -1.728977  |
| C | 0.877941   | -0.287812  | -1.783377  |
| C | -1.539460  | -0.731412  | -2.085577  |
| C | -1.245760  | -2.075812  | -2.504077  |
| C | -2.292160  | -2.910713  | -3.014477  |
| C | -3.680061  | -2.470712  | -2.845377  |
| C | -3.944161  | -1.149712  | -2.473077  |
| C | -2.880261  | -0.246112  | -2.114577  |
| C | -3.161961  | 1.083889   | -1.767277  |
| C | -2.120860  | 1.968389   | -1.397777  |
| C | -2.424860  | 3.321089   | -1.018377  |
| C | -1.406260  | 4.202690   | -0.598576  |
| C | -1.742560  | 5.455490   | -0.100776  |
| H | -0.944838  | 6.112374   | 0.269746   |
| C | -3.053361  | 5.921390   | -0.050276  |
| C | -4.036461  | 5.072590   | -0.561176  |
| H | -5.072180  | 5.432627   | -0.565918  |
| C | -3.768561  | 3.802889   | -1.051677  |
| C | -4.803261  | 2.935189   | -1.591277  |
| C | -4.520361  | 1.584789   | -1.868577  |
| C | -5.565261  | 0.722389   | -2.263477  |
| C | -5.292661  | -0.700312  | -2.450277  |
| C | -6.313062  | -1.637012  | -2.615377  |
| H | -7.353761  | -1.297451  | -2.558433  |
| C | -6.068061  | -2.980113  | -2.849677  |
| C | -6.095061  | 3.423389   | -1.857777  |
| H | -6.303043  | 4.482809   | -1.676412  |
| C | -7.099062  | 2.617689   | -2.357377  |
| C | -6.824062  | 1.269989   | -2.516977  |
| H | -7.624908  | 0.608602   | -2.867248  |
| H | 4.206381   | 11.980218  | 5.548313   |
| H | 10.253751  | 11.595242  | 8.613244   |
| H | 12.778689  | 5.609678   | 10.405228  |
| H | 9.663840   | -0.065264  | 8.328535   |
| H | 8.083667   | -3.080160  | 2.564278   |
| H | 6.885892   | 3.636449   | 2.914930   |
| H | 3.170161   | 5.013535   | -0.501565  |
| H | 3.148502   | 0.346369   | 6.319009   |
| H | -3.168033  | -5.071984  | 0.472047   |
| H | -6.883648  | -3.694586  | -2.945558  |
| H | -4.204159  | -12.038456 | -5.578945  |
| H | -10.251399 | -11.653580 | -8.644015  |
| H | -12.776788 | -5.668146  | -10.435409 |
| H | -3.146100  | -0.404713  | -6.349465  |
| H | -8.081574  | 3.021757   | -2.594433  |
| H | -3.296729  | 6.898502   | 0.355715   |
| H | 4.595044   | -1.428444  | -2.245296  |
| H | 3.299048   | -6.956842  | -0.386835  |
| H | -4.592546  | 1.370490   | 2.212981   |
| H | -9.661556  | 0.006794   | -8.358866  |

### Alternative packing Structure 1

|   | X          | Y         | Z         |
|---|------------|-----------|-----------|
| O | -9.924981  | 3.723258  | 2.510458  |
| C | -8.970772  | 2.995452  | 2.418587  |
| C | -4.806279  | 0.826881  | 0.539454  |
| H | -5.051283  | 1.842541  | 0.855814  |
| C | -7.587209  | 3.215488  | 2.957424  |
| C | -7.111193  | 4.304835  | 3.641148  |
| H | -7.748662  | 5.177463  | 3.810470  |
| C | -5.769921  | 4.284273  | 4.105674  |
| C | -5.167213  | 5.487229  | 4.679680  |
| C | -5.926672  | 6.652597  | 4.892915  |
| H | -6.993243  | 6.658224  | 4.658844  |
| C | -5.331629  | 7.802465  | 5.403517  |
| C | -3.965649  | 7.819038  | 5.692805  |
| H | -3.512281  | 8.733773  | 6.079208  |
| C | -3.176416  | 6.676994  | 5.492199  |
| C | -1.732872  | 6.695367  | 5.757270  |
| C | -1.089820  | 7.870484  | 6.178241  |
| H | -1.670287  | 8.781507  | 6.335348  |
| C | 0.287205   | 7.889845  | 6.398424  |
| C | 1.044760   | 6.738318  | 6.194621  |
| H | 2.122841   | 6.767265  | 6.365773  |
| C | 0.436622   | 5.542175  | 5.777393  |
| C | -0.967974  | 5.513674  | 5.568864  |
| C | -1.619937  | 4.279504  | 5.162390  |
| C | -3.006947  | 4.271434  | 4.862247  |
| C | -3.786624  | 5.487857  | 5.007613  |
| C | -3.630007  | 3.078288  | 4.425019  |
| C | -5.019865  | 3.093891  | 3.996286  |
| C | -5.590632  | 1.906581  | 3.412048  |
| C | -6.789302  | 2.047877  | 2.716697  |
| C | -4.909509  | 0.626081  | 3.642056  |
| C | -3.548293  | 0.625536  | 4.040485  |
| C | -2.884318  | 1.873135  | 4.376021  |
| C | -1.510249  | 1.873510  | 4.702933  |
| C | -0.867666  | 3.087043  | 5.057241  |
| C | 0.569841   | 3.108529  | 5.264913  |
| C | 1.230958   | 4.327791  | 5.556206  |
| C | 2.634294   | 4.358112  | 5.606987  |
| H | 3.146644   | 5.302001  | 5.806712  |
| C | 3.397385   | 3.208876  | 5.381041  |
| C | 2.731009   | 1.991504  | 5.176839  |
| H | 3.324955   | 1.084812  | 5.039523  |
| C | 1.333357   | 1.919892  | 5.123242  |
| C | 0.643906   | 0.640187  | 4.906156  |
| C | -0.756833  | 0.631409  | 4.680908  |
| C | 1.346133   | -0.572580 | 4.924310  |
| H | 2.423127   | -0.569777 | 5.108356  |
| C | 0.700716   | -1.797275 | 4.707910  |
| C | -0.678898  | -1.795517 | 4.478121  |
| H | -1.188839  | -2.747003 | 4.309409  |
| C | -1.418133  | -0.601967 | 4.452130  |
| C | -2.860619  | -0.606906 | 4.175049  |
| C | -3.576276  | -1.806234 | 4.042416  |
| H | -3.056932  | -2.760127 | 4.160077  |
| C | -4.952148  | -1.813527 | 3.778879  |
| C | -5.602316  | -0.590260 | 3.569684  |
| H | -6.673155  | -0.597138 | 3.357991  |
| C | -7.541255  | 1.183248  | 1.771867  |
| C | -8.893088  | 1.659951  | 1.736086  |
| C | -9.896530  | 0.978759  | 1.096507  |
| H | -10.917481 | 1.372118  | 1.087837  |
| C | -9.588050  | -0.252886 | 0.461207  |
| C | -10.655944 | -1.085334 | -0.091700 |
| C | -11.995669 | -0.654979 | -0.070778 |
| H | -12.247165 | 0.323594  | 0.344026  |
| C | -13.008931 | -1.464743 | -0.574779 |
| C | -12.706436 | -2.722481 | -1.099380 |
| H | -13.513687 | -3.349740 | -1.482581 |
| C | -11.382391 | -3.184524 | -1.137460 |
| C | -11.060012 | -4.512182 | -1.672250 |
| C | -12.071938 | -5.364178 | -2.143173 |
| H | -13.113260 | -5.036172 | -2.120343 |
| C | -11.764595 | -6.630005 | -2.640699 |
| C | -10.441472 | -7.064334 | -2.673908 |
| H | -10.213048 | -8.058442 | -3.063727 |
| C | -9.401466  | -6.238737 | -2.212837 |
| C | -9.708573  | -4.947444 | -1.709066 |
| C | -8.644869  | -4.074232 | -1.238889 |

|   |            |           |           |
|---|------------|-----------|-----------|
| C | -8.957291  | -2.794712 | -0.708477 |
| C | -10.340080 | -2.353959 | -0.643597 |
| C | -7.922130  | -1.945498 | -0.247892 |
| C | -8.242109  | -0.666643 | 0.370589  |
| C | -7.182544  | 0.137386  | 0.924519  |
| C | -5.804986  | -0.156967 | 0.512227  |
| C | -5.502853  | -1.435212 | -0.020642 |
| C | -6.570548  | -2.357134 | -0.368277 |
| C | -6.257876  | -3.629639 | -0.898578 |
| C | -7.297803  | -4.499696 | -1.313701 |
| C | -6.972924  | -5.826146 | -1.814296 |
| C | -8.008025  | -6.694987 | -2.247880 |
| C | -7.680590  | -7.983158 | -2.705175 |
| H | -8.471217  | -8.659067 | -3.036665 |
| C | -6.355216  | -8.410969 | -2.738550 |
| C | -5.333708  | -7.558002 | -2.322550 |
| H | -4.298659  | -7.904474 | -2.356450 |
| C | -5.621525  | -6.262989 | -1.861950 |
| C | -4.545907  | -5.353994 | -1.446900 |
| C | -4.870315  | -4.044982 | -1.014504 |
| C | -3.823090  | -3.142810 | -0.689751 |
| C | -4.153382  | -1.768072 | -0.295982 |
| C | -3.169372  | -0.772308 | -0.213260 |
| H | -2.132841  | -1.015039 | -0.456720 |
| C | -3.492452  | 0.543906  | 0.142885  |
| C | -3.200784  | -5.758662 | -1.483268 |
| H | -2.951859  | -6.773386 | -1.803096 |
| C | -2.167271  | -4.890203 | -1.123486 |
| C | -2.494465  | -3.581386 | -0.738646 |
| H | -1.687727  | -2.894096 | -0.473918 |
| O | 8.944961   | -2.631515 | -2.238463 |
| C | 4.712996   | -0.489782 | -0.526831 |
| H | 4.952585   | -1.503041 | -0.857555 |
| C | 7.679090   | -2.906981 | -2.790703 |
| C | 7.375410   | -4.091731 | -3.429069 |
| H | 8.114790   | -4.884688 | -3.528025 |
| C | 6.062595   | -4.226207 | -3.921875 |
| C | 5.611377   | -5.512416 | -4.462897 |
| C | 6.498918   | -6.595038 | -4.591485 |
| H | 7.550366   | -6.471793 | -4.322531 |
| C | 6.053284   | -7.828965 | -5.060471 |
| C | 4.710486   | -8.008010 | -5.392090 |
| H | 4.371729   | -8.984330 | -5.745259 |
| C | 3.794757   | -6.949590 | -5.279067 |
| C | 2.375744   | -7.139474 | -5.599634 |
| C | 1.879281   | -8.401132 | -5.967105 |
| H | 2.556705   | -9.254452 | -6.031389 |
| C | 0.526088   | -8.578450 | -6.251511 |
| C | -0.354008  | -7.500808 | -6.169968 |
| H | -1.411185  | -7.653258 | -6.394992 |
| C | 0.105774   | -6.223500 | -5.808370 |
| C | 1.485396   | -6.036026 | -5.526198 |
| C | 1.985070   | -4.719333 | -5.162938 |
| C | 3.341483   | -4.548831 | -4.789370 |
| C | 4.252764   | -5.679270 | -4.837350 |
| C | 3.812439   | -3.275398 | -4.384470 |
| C | 5.169707   | -3.118691 | -3.884753 |
| C | 5.570226   | -1.860195 | -3.335487 |
| C | 6.764496   | -1.824529 | -2.599434 |
| C | 4.768268   | -0.671338 | -3.640560 |
| C | 3.450854   | -0.831208 | -4.138542 |
| C | 2.944601   | -2.156709 | -4.446190 |
| C | 1.602956   | -2.316874 | -4.864343 |
| C | 1.111048   | -3.606551 | -5.181372 |
| C | -0.297578  | -3.787726 | -5.486206 |
| C | -0.816151  | -5.084114 | -5.727006 |
| C | -2.202533  | -5.258291 | -5.872073 |
| H | -2.605384  | -6.260174 | -6.036229 |
| C | -3.086010  | -4.178100 | -5.792390 |
| C | -2.555251  | -2.889193 | -5.635121 |
| H | -3.240746  | -2.038572 | -5.608819 |
| C | -1.178507  | -2.674295 | -5.491794 |
| C | -0.629296  | -1.320270 | -5.336971 |
| C | 0.735710   | -1.157913 | -4.992268 |
| C | -1.431839  | -0.186807 | -5.544977 |
| H | -2.480135  | -0.313260 | -5.824348 |
| C | -0.915813  | 1.105657  | -5.415622 |
| C | 0.424050   | 1.256571  | -5.028336 |
| H | 0.824574   | 2.265011  | -4.902658 |
| C | 1.256458   | 0.150049  | -4.809445 |



|   |            |           |           |
|---|------------|-----------|-----------|
| C | 2.655768   | 0.316603  | -4.393961 |
| C | 3.227153   | 1.588257  | -4.251468 |
| H | 2.625130   | 2.476558  | -4.458561 |
| C | 4.565297   | 1.755015  | -3.866159 |
| C | 5.317691   | 0.618329  | -3.553944 |
| H | 6.360531   | 0.746039  | -3.254644 |
| C | 7.443395   | -0.907757 | -1.688729 |
| C | 8.789630   | -1.383056 | -1.608269 |
| C | 9.823515   | -0.716082 | -0.983978 |
| H | 10.832037  | -1.126464 | -0.971719 |
| C | 9.511626   | 0.519286  | -0.382848 |
| C | 10.580174  | 1.351321  | 0.179019  |
| C | 11.912838  | 0.904010  | 0.186354  |
| H | 12.156937  | -0.085461 | -0.206915 |
| C | 12.932088  | 1.709075  | 0.690178  |
| C | 12.638232  | 2.979272  | 1.184237  |
| H | 13.447428  | 3.605380  | 1.566870  |
| C | 11.318564  | 3.459718  | 1.194681  |
| C | 11.009058  | 4.801979  | 1.697927  |
| C | 12.029070  | 5.654382  | 2.152666  |
| H | 13.066912  | 5.315998  | 2.139477  |
| C | 11.732639  | 6.933224  | 2.620591  |
| C | 10.413252  | 7.381457  | 2.641714  |
| H | 10.194333  | 8.385913  | 3.009295  |
| C | 9.366764   | 6.556309  | 2.196705  |
| C | 9.662484   | 5.251446  | 1.720650  |
| C | 8.592065   | 4.379019  | 1.262516  |
| C | 8.893943   | 3.091789  | 0.750731  |
| C | 10.272410  | 2.633404  | 0.704538  |
| C | 7.852629   | 2.246298  | 0.292693  |
| C | 8.160934   | 0.961283  | -0.317498 |
| C | 7.100155   | 0.174751  | -0.866218 |
| C | 5.722704   | 0.484333  | -0.475919 |
| C | 5.429300   | 1.758853  | 0.067006  |
| C | 6.505653   | 2.670664  | 0.410964  |
| C | 6.201536   | 3.951260  | 0.931117  |
| C | 7.247124   | 4.818124  | 1.331953  |
| C | 6.934213   | 6.155025  | 1.809995  |
| C | 7.977157   | 7.025577  | 2.221545  |
| C | 7.661037   | 8.326317  | 2.648420  |
| H | 8.457776   | 9.003982  | 2.961141  |
| C | 6.338746   | 8.765557  | 2.676148  |
| C | 5.310030   | 7.909813  | 2.286049  |
| H | 4.277342   | 8.263855  | 2.316375  |
| C | 5.586281   | 6.601557  | 1.855719  |
| C | 4.502265   | 5.689910  | 1.469591  |
| C | 4.816088   | 4.374161  | 1.050186  |
| C | 3.760546   | 3.474114  | 0.744045  |
| C | 4.080462   | 2.098322  | 0.344546  |
| C | 3.090687   | 1.110482  | 0.248709  |
| H | 2.055773   | 1.357199  | 0.496628  |
| C | 3.402825   | -0.204039 | -0.128904 |
| C | 3.158957   | 6.100020  | 1.520339  |
| H | 2.918767   | 7.119865  | 1.829888  |
| C | 2.117170   | 5.230771  | 1.188453  |
| C | 2.434404   | 3.917327  | 0.809756  |
| H | 1.621468   | 3.230966  | 0.564007  |
| H | -5.932330  | 8.696120  | 5.573897  |
| H | 0.771320   | 8.807948  | 6.729790  |
| H | 12.533964  | 7.584131  | 2.969739  |
| H | -12.560722 | -7.279875 | -3.002809 |
| H | 6.754008   | -8.657010 | -5.164485 |
| H | 0.155800   | -9.562328 | -6.538260 |
| H | 6.108673   | 9.778445  | 3.004580  |
| H | 13.959922  | 1.347538  | 0.694762  |
| H | -6.115939  | -9.414092 | -3.090894 |
| H | -14.042457 | -1.118468 | -0.557260 |
| H | 1.260383   | -2.728497 | 4.723998  |
| H | 4.483729   | 3.252015  | 5.381995  |
| H | 1.081802   | 5.559258  | 1.230749  |
| H | 5.003919   | 2.747312  | -3.798148 |
| H | -1.540518  | 1.975787  | -5.597586 |
| H | -4.159763  | -4.328611 | -5.868677 |
| H | -5.502035  | -2.749618 | 3.721389  |
| H | -2.733814  | 1.321942  | 0.143843  |
| H | 2.636725   | -0.974137 | -0.143420 |
| H | -1.130350  | -5.215524 | -1.152054 |

### Alternative packing Structure 2

|   | X         | Y          | Z         |
|---|-----------|------------|-----------|
| O | -5.177314 | 0.783477   | 3.837701  |
| C | -4.273360 | 0.027037   | 3.591585  |
| C | -0.547260 | -2.197652  | 1.052069  |
| H | -0.714556 | -1.187270  | 1.430815  |
| C | -2.813202 | 0.206311   | 3.887769  |
| C | -2.188068 | 1.280046   | 4.468241  |
| H | -2.754636 | 2.176898   | 4.735582  |
| C | -0.787354 | 1.214776   | 4.693034  |
| C | -0.051762 | 2.407701   | 5.114464  |
| C | -0.718039 | 3.617283   | 5.371741  |
| H | -1.807215 | 3.661647   | 5.294798  |
| C | -0.018570 | 4.779589   | 5.710240  |
| C | 1.377781  | 4.716684   | 5.804513  |
| H | 1.928999  | 5.624865   | 6.062154  |
| C | 2.078146  | 3.527258   | 5.562029  |
| C | 3.544732  | 3.483493   | 5.635783  |
| C | 4.286896  | 4.647865   | 5.891211  |
| H | 3.765286  | 5.597654   | 6.036199  |
| C | 5.683245  | 4.627006   | 5.948647  |
| C | 6.340192  | 3.402165   | 5.727276  |
| H | 7.430949  | 3.377647   | 5.831089  |
| C | 5.634893  | 2.218081   | 5.513261  |
| C | 4.218812  | 2.252598   | 5.431660  |
| C | 3.472221  | 1.042207   | 5.132879  |
| C | 2.058027  | 1.093734   | 5.015945  |
| C | 1.360220  | 2.347895   | 5.230332  |
| C | 1.330582  | -0.075787  | 4.688883  |
| C | -0.108664 | -0.004678  | 4.481912  |
| C | -0.811157 | -1.168364  | 4.004831  |
| C | -2.103437 | -0.983772  | 3.518938  |
| C | -0.145979 | -2.472762  | 4.104709  |
| C | 1.261472  | -2.523291  | 4.271086  |
| C | 2.015278  | -1.307088  | 4.525379  |
| C | 3.420852  | -1.364102  | 4.664554  |
| C | 4.153512  | -0.182993  | 4.948214  |
| C | 5.604030  | -0.235270  | 5.046408  |
| C | 6.341687  | 0.946597   | 5.319510  |
| C | 7.743440  | 0.880233   | 5.399119  |
| H | 8.317855  | 1.784754   | 5.608716  |
| C | 8.411655  | -0.327850  | 5.213299  |
| C | 7.691346  | -1.491570  | 4.947330  |
| H | 8.226875  | -2.432228  | 4.805193  |
| C | 6.289829  | -1.465796  | 4.862722  |
| C | 5.528172  | -2.692587  | 4.595971  |
| C | 4.114240  | -2.633096  | 4.518918  |
| C | 6.180894  | -3.924400  | 4.424015  |
| H | 7.271259  | -3.967262  | 4.477463  |
| C | 5.468192  | -5.101697  | 4.179329  |
| C | 4.069090  | -5.040191  | 4.138622  |
| H | 3.505707  | -5.960104  | 3.965051  |
| C | 3.381632  | -3.830038  | 4.305985  |
| C | 1.915452  | -3.780208  | 4.256492  |
| C | 1.148489  | -4.953862  | 4.211617  |
| H | 1.647742  | -5.925363  | 4.212092  |
| C | -0.251365 | -4.913367  | 4.187449  |
| C | -0.883517 | -3.665347  | 4.126308  |
| H | -1.974457 | -3.632894  | 4.105275  |
| C | -3.026947 | -1.816801  | 2.708379  |
| C | -4.352300 | -1.308013  | 2.907492  |
| C | -5.465269 | -1.966024  | 2.450263  |
| H | -6.464013 | -1.553665  | 2.620113  |
| C | -5.296458 | -3.199476  | 1.767516  |
| C | -6.458487 | -4.017555  | 1.422922  |
| C | -7.765523 | -3.572724  | 1.695462  |
| H | -7.923636 | -2.590143  | 2.145102  |
| C | -8.864078 | -4.373087  | 1.397052  |
| C | -8.678962 | -5.636520  | 0.833182  |
| H | -9.550244 | -6.257074  | 0.614736  |
| C | -7.390749 | -6.112266  | 0.546257  |
| C | -7.188730 | -7.446415  | -0.029622 |
| C | -8.277918 | -8.299643  | -0.269087 |
| H | -9.290846 | -7.968383  | -0.030917 |
| C | -8.083296 | -9.570810  | -0.808056 |
| C | -6.797399 | -10.007668 | -1.117810 |
| H | -6.656962 | -11.004754 | -1.540304 |
| C | -5.683136 | -9.180343  | -0.894681 |
| C | -5.875287 | -7.886298  | -0.343497 |
| C | -4.734247 | -7.016952  | -0.103651 |

|   |           |            |           |
|---|-----------|------------|-----------|
| C | -4.925654 | -5.740629  | 0.488403  |
| C | -6.265536 | -5.289705  | 0.824193  |
| C | -3.812568 | -4.904200  | 0.745187  |
| C | -3.996187 | -3.632339  | 1.429910  |
| C | -2.841667 | -2.854474  | 1.797140  |
| C | -1.562013 | -3.160361  | 1.147995  |
| C | -1.386283 | -4.420032  | 0.520971  |
| C | -2.514090 | -5.320854  | 0.354131  |
| C | -2.325568 | -6.581221  | -0.258661 |
| C | -3.433837 | -7.442660  | -0.462652 |
| C | -3.227263 | -8.762414  | -1.038943 |
| C | -4.330150 | -9.634726  | -1.231544 |
| C | -4.108930 | -10.922583 | -1.749684 |
| H | -4.951145 | -11.602067 | -1.893387 |
| C | -2.824016 | -11.344428 | -2.083377 |
| C | -1.739750 | -10.483921 | -1.915701 |
| H | -0.738885 | -10.823895 | -2.188974 |
| C | -1.921773 | -9.189676  | -1.402389 |
| C | -0.785833 | -8.271726  | -1.251161 |
| C | -0.998994 | -6.986473  | -0.693094 |
| C | 0.097171  | -6.092580  | -0.577264 |
| C | -0.117770 | -4.754297  | -0.014677 |
| C | 0.901587  | -3.791169  | -0.022359 |
| H | 1.879647  | -4.042414  | -0.439570 |
| C | 0.689353  | -2.496144  | 0.467718  |
| C | 0.503543  | -8.643711  | -1.665531 |
| H | 0.666165  | -9.636219  | -2.091847 |
| C | 1.587826  | -7.767490  | -1.556837 |
| C | 1.369123  | -6.499744  | -1.003494 |
| H | 2.213478  | -5.812020  | -0.910259 |
| O | 4.768930  | 1.154902   | -2.983045 |
| C | 0.211859  | 2.369706   | -1.186249 |
| H | 0.600949  | 1.477845   | -1.682994 |
| C | 3.572637  | 0.803374   | -3.636816 |
| C | 3.456372  | -0.295159  | -4.462103 |
| H | 4.303543  | -0.953504  | -4.647538 |
| C | 2.187371  | -0.532395  | -5.026701 |
| C | 1.932305  | -1.782372  | -5.750081 |
| C | 2.945532  | -2.747299  | -5.895782 |
| H | 3.943561  | -2.544096  | -5.498861 |
| C | 2.705222  | -3.967918  | -6.528529 |
| C | 1.421790  | -4.213017  | -7.038584 |
| H | 1.228636  | -5.166956  | -7.536392 |
| C | 0.389253  | -3.273862  | -6.920277 |
| C | -0.950212 | -3.555387  | -7.448905 |
| C | -1.232716 | -4.778001  | -8.079786 |
| H | -0.447729 | -5.529343  | -8.185336 |
| C | -2.508169 | -5.048245  | -8.572842 |
| C | -3.521126 | -4.100833  | -8.442371 |
| H | -4.517200 | -4.324060  | -8.829797 |
| C | -3.274602 | -2.865893  | -7.818392 |
| C | -1.976980 | -2.583556  | -7.316553 |
| C | -1.702403 | -1.308527  | -6.670559 |
| C | -0.412575 | -1.042648  | -6.144334 |
| C | 0.640271  | -2.035781  | -6.271535 |
| C | -0.148897 | 0.187112   | -5.491665 |
| C | 1.149444  | 0.430341   | -4.879524 |
| C | 1.351752  | 1.621032   | -4.113683 |
| C | 2.505325  | 1.699782   | -3.318364 |
| C | 0.394084  | 2.720872   | -4.251462 |
| C | -0.875812 | 2.466117   | -4.827270 |
| C | -1.167883 | 1.170620   | -5.415625 |
| C | -2.449979 | 0.916070   | -5.959202 |
| C | -2.725065 | -0.334236  | -6.566970 |
| C | -4.057288 | -0.614986  | -7.079102 |
| C | -4.340522 | -1.868078  | -7.682536 |
| C | -5.641175 | -2.134679  | -8.142935 |
| H | -5.867524 | -3.099035  | -8.602409 |
| C | -6.650487 | -1.182232  | -8.018571 |
| C | -6.374745 | 0.055387   | -7.439613 |
| H | -7.172499 | 0.795786   | -7.352090 |
| C | -5.085955 | 0.357950   | -6.970046 |
| C | -4.788431 | 1.667770   | -6.380764 |
| C | -3.481813 | 1.940480   | -5.898156 |
| C | -5.776597 | 2.663198   | -6.298010 |
| H | -6.785536 | 2.458437   | -6.660950 |
| C | -5.484218 | 3.914610   | -5.758763 |
| C | -4.198549 | 4.194411   | -5.299093 |
| H | -3.979767 | 5.179613   | -4.883433 |
| C | -3.186421 | 3.222625   | -5.363703 |

|   |           |           |           |
|---|-----------|-----------|-----------|
| C | -1.832435 | 3.511501  | -4.879732 |
| C | -1.461926 | 4.804115  | -4.483088 |
| H | -2.191837 | 5.615452  | -4.536971 |
| C | -0.164925 | 5.091422  | -4.035474 |
| C | 0.746312  | 4.037520  | -3.913393 |
| H | 1.756883  | 4.256396  | -3.560723 |
| C | 3.014464  | 2.530597  | -2.230342 |
| C | 4.413189  | 2.240595  | -2.161350 |
| C | 5.322328  | 2.924703  | -1.382213 |
| H | 6.378956  | 2.661456  | -1.387112 |
| C | 4.817466  | 3.979022  | -0.596084 |
| C | 5.742141  | 4.841294  | 0.146116  |
| C | 7.127800  | 4.603004  | 0.118619  |
| H | 7.522021  | 3.749911  | -0.438607 |
| C | 8.009150  | 5.443830  | 0.793658  |
| C | 7.520827  | 6.539214  | 1.505238  |
| H | 8.222406  | 7.196603  | 2.023383  |
| C | 6.143203  | 6.803459  | 1.563405  |
| C | 5.628074  | 7.955756  | 2.311780  |
| C | 6.496019  | 8.818138  | 2.995296  |
| H | 7.571826  | 8.629799  | 2.973646  |
| C | 6.019389  | 9.922026  | 3.716708  |
| C | 4.645601  | 10.172080 | 3.720280  |
| H | 4.266485  | 11.040243 | 4.264438  |
| C | 3.743840  | 9.329247  | 3.048439  |
| C | 4.229804  | 8.198334  | 2.345810  |
| C | 3.309155  | 7.293505  | 1.677002  |
| C | 3.806385  | 6.182045  | 0.950229  |
| C | 5.238848  | 5.943195  | 0.884594  |
| C | 2.909782  | 5.300998  | 0.296082  |
| C | 3.415023  | 4.207062  | -0.521001 |
| C | 2.494093  | 3.392134  | -1.252578 |
| C | 1.075044  | 3.436829  | -0.889551 |
| C | 0.589150  | 4.531495  | -0.131695 |
| C | 1.512023  | 5.503266  | 0.427139  |
| C | 1.014032  | 6.606351  | 1.160845  |
| C | 1.914029  | 7.519811  | 1.762679  |
| C | 1.404340  | 8.687316  | 2.463562  |
| C | 2.302102  | 9.600761  | 3.075419  |
| C | 1.793903  | 10.751187 | 3.702360  |
| H | 2.479036  | 11.464140 | 4.165763  |
| C | 0.423073  | 10.997321 | 3.738368  |

|   |           |            |           |
|---|-----------|------------|-----------|
| C | -0.464666 | 10.090129  | 3.161602  |
| H | -1.537434 | 10.289141  | 3.204136  |
| C | 0.005708  | 8.927532   | 2.529613  |
| C | -0.927110 | 7.949686   | 1.958913  |
| C | -0.421368 | 6.795381   | 1.306100  |
| C | -1.323809 | 5.820104   | 0.804879  |
| C | -0.799333 | 4.621394   | 0.142329  |
| C | -1.639690 | 3.556431   | -0.210048 |
| H | -2.706486 | 3.609849   | 0.021146  |
| C | -1.141672 | 2.404183   | -0.834945 |
| C | -2.316664 | 8.126390   | 2.068292  |
| H | -2.714572 | 9.016984   | 2.557756  |
| C | -3.197867 | 7.172434   | 1.561706  |
| C | -2.706721 | 6.025069   | 0.941304  |
| H | -3.406887 | 5.281228   | 0.556125  |
| H | -8.938108 | -10.222372 | -0.987129 |
| H | -2.713155 | -6.001669  | -9.058903 |
| H | 0.043894  | 11.897968  | 4.220281  |
| H | 9.080434  | 5.247836   | 0.763518  |
| H | -2.665753 | -12.347233 | -2.479141 |
| H | -9.872000 | -4.015139  | 1.607409  |
| H | 9.498771  | -0.364095  | 5.276894  |
| H | -4.273432 | 7.322232   | 1.653762  |
| H | -6.261234 | 4.676215   | -5.698719 |
| H | -7.655642 | -1.404231  | -8.375395 |
| H | 6.246155  | 5.537882   | 6.131780  |
| H | 6.706384  | 10.573518  | 4.249404  |
| H | -0.545453 | 5.712082   | 5.895470  |
| H | 5.985589  | -6.045937  | 4.035733  |
| H | -0.834881 | -5.830375  | 4.200454  |
| H | 1.471328  | -1.742728  | 0.407186  |
| H | 2.578776  | -8.064549  | -1.887992 |
| H | 3.492101  | -4.709770  | -6.629186 |
| H | 0.120961  | 6.106677   | -3.773549 |
| H | -1.796454 | 1.565770   | -1.059667 |

## References

1. D. Reger, P. Haines, K. Y. Amsharov, J. A. Schmidt, T. Ullrich, S. Bönisch, F. Hampel, A. Görling, J. Nelson, K. E. Jelfs, D. M. Guldi and N. Jux, *Angew. Chem. Int. Ed.*, 2021, **60**, 18221-18229.
2. D. Douglas, *Journal of the american society for mass spectrometry*, 1998, **9**, 101-113.
3. Y. G. Shao, Z.; Epifanovsky, E.; Gilbert, A. T. B.; Wormit, M.; Kussmann, J.; Lange, A. W.; Behn, A.; Deng, J.; Feng, X.; Ghosh, D.; Goldey, M.; Horn, P. R.; Jacobson, L. D.; Kaliman, I.; Khaliullin, R. Z.; Kus, T.; Landau, A.; Liu, J.; Proynov, E. I.; Rhee, Y. M.; Richard, R. M.; Rohrdanz, M. A.; Steele, R. P.; Sundstrom, E. J.; Woodcock, H. L.; Zimmerman, P. M.; Zuev, D.; Albrecht, B.; Alguire, E.; Austin, B.; Beran, G. J. O.; Bernard, Y. A.; Berquist, E.; Brandhorst, K.; Bravaya, K. B.; Brown, S. T.; Casanova, D.; Chang, C.-M.; Chen, Y.; Chien, S. H.; Closser, K. D.; Crittenden, D. L.; Diedenhofen, M.; DiStasio, R. A.; Do, H.; Dutoi, A. D.; Edgar, R. G.; Fatehi, S.; Fusti-Molnar, L.; Ghysels, A.; Golubeva-Zadorozhnaya, A.; Gomes, J.; Hanson-Heine, M. W. D.; Harbach, P. H. P.; Hauser, A. W.; Hohenstein, E. G.; Holden, Z. C.; Jagau, T.-C.; Ji, H.; Kaduk, B.; Khistyayev, K.; Kim, J.; Kim, J.; King, R. A.; Klunzinger, P.; Kosenkov, D.; Kowalczyk, T.; Krauter, C. M.; Lao, K. U.; Laurent, A. D.; Lawler, K. V.; Levchenko, S. V.; Lin, C. Y.; Liu, F.; Livshits, E.; Lochan, R. C.; Luenser, A.; Manohar, P.; Manzer, S. F.; Mao, S.-P.; Mardirossian, N.; Marenich, A. V.; Maurer, S. A.; Mayhall, N. J.; Neuscammann, E.; Oana, C. M.; Olivares-Amaya, R.; O'Neill, D. P.; Parkhill, J. A.; Perrine, T. M.; Peverati, R.; Prociuk, A.; Rehn, D. R.; Rosta, E.; Russ, N. J.; Sharada, S. M.; Sharma, S.; Small, D. W.; Sodt, *Mol. Phys.*, 2015, **113**, 184-215.
4. E. Epifanovsky, A. T. B. Gilbert, X. Feng, J. Lee, Y. Mao, N. Mardirossian, P. Pokhilko, A. F. White, M. P. Coons, A. L. Dempwolff, Z. Gan, D. Hait, P. R. Horn, L. D. Jacobson, I. Kaliman, J. Kussmann, A. W. Lange, K. U. Lao, D. S. Levine, J. Liu, S. C. McKenzie, A. F. Morrison, K. D. Nanda, F. Plasser, D. R. Rehn, M. L. Vidal, Z.-Q. You, Y. Zhu, B. Alam, B. J. Albrecht, A. Aldossary, E. Alguire, J. H. Andersen, V. Athavale, D. Barton, K. Begam, A. Behn, N. Bellonzi, Y. A. Bernard, E. J. Berquist, H. G. A. Burton, A. Carreras, K. Carter-Fenk, R. Chakraborty, A. D. Chien, K. D. Closser, V. Cofer-Shabica, S. Dasgupta, M. d. Wergifosse, J. Deng, M. Diedenhofen, H. Do, S. Ehlert, P.-T. Fang, S. Fatehi, Q. Feng, T. Friedhoff, J. Gayvert, Q. Ge, G. Gidofalvi, M. Goldey, J. Gomes, C. E. González-Espinoza, S. Gulania, A. O. Gunina, M. W. D. Hanson-Heine, P. H. P. Harbach, A. Hauser, M. F. Herbst, M. H. Vera, M. Hodecker, Z. C. Holden, S. Houck, X. Huang, K. Hui, B. C. Huynh, M. Ivanov, Á. Jász, H. Ji, H. Jiang, B. Kaduk, S. Kähler, K. Khistyayev, J. Kim, G. Kis, P. Klunzinger, Z. Koczor-Benda, J. H. Koh, D. Kosenkov, L. Koulias, T. Kowalczyk, C. M. Krauter, K. Kue, A. Kunitsa, T. Kus, I. Ladjanszki, A. Landau, K. V. Lawler, D. Lefrancois, S. Lehtola, R. R. Li, Y.-P. Li, J. Liang, M. Liebenthal, H.-H. Lin, Y.-S. Lin, F. Liu, K.-Y. Liu, M. Loipersberger, A. Luenser, A. Manjanath, P. Manohar, E. Mansoor, S. F. Manzer, S.-P. Mao, A. V. Marenich, T. Markovich, S. Mason, S. A. Maurer, P. F. McLaughlin, M. F. S. J. Menger, J.-M. Mewes, S. A. Mewes, P. Morgante, J. W. Mullinax, K. J. Oosterbaan, G. Paran, A. C. Paul, S. K. Paul, F. Pavošević, Z. Pei, S. Prager, E. I. Proynov, Á. Rák, E. Ramos-Cordoba, B. Rana, A. E. Rask, A. Rettig, R. M. Richard, F. Rob, E. Rossomme, T. Scheele, M. Scheurer, M. Schneider, N. Sergueev, S. M. Sharada, W. Skomorowski, D. W. Small, C. J. Stein, Y.-C. Su, E. J. Sundstrom, Z. Tao, J. Thirman, G. J. Tornai, T. Tsuchimochi, N. M. Tubman, S. P. Veccham, O. Vydrov, J. Wenzel, J. Witte, A. Yamada, K. Yao, S. Yeganeh, S. R. Yost, A. Zech, I. Y. Zhang, X. Zhang, Y. Zhang, D. Zuev, A. Aspuru-Guzik, A. T. Bell, N. A. Besley, K. B. Bravaya, B. R. Brooks, D. Casanova, J.-D. Chai, S. Coriani, C. J. Cramer, G. Cserey, A. E. DePrinceIII, R. A. DiStasioJr., A. Dreuw, B. D. Dunietz, T. R. Furlani, W. A. GoddardIII, S. Hammes-Schiffer, T. Head-Gordon, W. J. Hehre, C.-P. Hsu, T.-C. Jagau, Y. Jung, A. Klamt, J. Kong, D. S. Lambrecht, W. Liang, N. J. Mayhall, C. W. McCurdy, J. B. Neaton, C. Ochsenfeld, J. A. Parkhill, R. Peverati, V. A. Rassolov, Y. Shao, L. V. Slipchenko, T. Stauch, R. P. Steele, J. E. Subotnik, A. J. W. Thom, A. Tkatchenko, D. G. Truhlar, T. V. Voorhis, T. A. Wesolowski, K.

- B. Whaley, H. L. WoodcockIII, P. M. Zimmerman, S. Faraji, P. M. W. Gill, M. Head-Gordon, J. M. Herbert and A. I. Krylov, *J. Chem. Phys.*, 2021, **155**, 084801.
5. J.-D. Chai and M. Head-Gordon, *Physical Chemistry Chemical Physics*, 2008, **10**, 6615-6620.
  6. M. Ernzerhof and G. E. Scuseria, *J. Chem. Phys.*, 1999, **110**, 5029-5036.
  7. S. Grimme, J. Antony, S. Ehrlich and H. Krieg, *The Journal of Chemical Physics*, 2010, **132**, 154104.
  8. A. D. Becke, *J. Chem. Phys.*, 1993, **98**, 1372-1377.
  9. P. J. Stephens, F. J. Devlin, C. F. Chabalowski and M. J. Frisch, *J. Phys. Chem.*, 1994, **98**, 11623-11627.
  10. T. Yanai, D. P. Tew and N. C. Handy, *Chem. Phys. Lett.*, 2004, **393**, 51-57.
  11. F. Weigend and R. Ahlrichs, *Physical Chemistry Chemical Physics*, 2005, **7**, 3297-3305.
